# Supplementary material for: Characterization of Candidate Factors Associated With the Metastasis and Progression of High Grade Serous Ovarian Cancer
Source: Research Square preprint supplement (doi:10.21203/rs.3.rs-497718/v1), 2021-05-11
Supplement: Supplementary file 1 [file 9573d8c6ed1575a9cbb40a37.xlsx]

## Sheet: 工作表1
STAR	6.68529	0.000161195		-6.68529
FOXL2	6.05034	0.00125831		-6.05034
GATA4	5.96774	0.00108076		-5.96774
DLK1	5.83792	0.000219846		-5.83792
KLHDC8A	5.03111	5.80759e-05		-5.03111
RPL31P12	4.95538	0.0206614		-4.95538
SPRR2F	4.90731	0.0189188		-4.90731
PROK1	4.88472	0.00287525		-4.88472
RP3-467K16.7	4.82979	0.0313093		-4.82979
C3orf72	4.77676	1.95805e-05		-4.77676
MIR4499	4.75667	1.04e-08		-4.75667
AC108051.2	4.73032	2.71691e-05		-4.73032
SIGLEC11	4.56421	0.000236267		-4.56421
RNASE4	4.56209	0.0316604		-4.56209
ARX	4.54801	0.00105882		-4.54801
RNU6-395P	4.53742	2.22491e-05		-4.53742
LINC00473	4.52747	0.00182882		-4.52747
MIR381	4.51566	0.0391758		-4.51566
TSPAN8	4.51493	3.2775e-05		-4.51493
MIR202HG	4.50145	0.0472451		-4.50145
MUM1L1	4.49606	0.000845136		-4.49606
TPT1P14	4.47362	1.09e-06		-4.47362
RN7SL783P	4.47207	0.0189803		-4.47207
MIR3938	4.45909	0.0370496		-4.45909
RP11-388E23.4	4.44104	0.0361898		-4.44104
SNORD114-24	4.3907	0.00272782		-4.3907
AC007551.1	4.38866	0.00325292		-4.38866
SAR1AP4	4.38681	0.0259665		-4.38681
MYOCD	4.34134	8.84541e-05		-4.34134
RP6-24A23.7	4.26809	0.00675483		-4.26809
RP11-35G9.5	4.24919	0.0266188		-4.24919
MIR1193	4.24775	0.00906173		-4.24775
CTD-2332E11.2	4.23783	0.0047575		-4.23783
AC008992.1	4.23742	0.0187578		-4.23742
RP11-548O1.3	4.20025	0.0108833		-4.20025
RNU7-163P	4.1606	0.000320591		-4.1606
FAM150B	4.15235	0.000924538		-4.15235
AC068831.12	4.08943	0.0486301		-4.08943
NR5A1	4.0821	0.000606289		-4.0821
MIR300	4.08047	0.0326717		-4.08047
RSL24D1P2	4.06329	0.00629031		-4.06329
CR381653.1	3.99939	0.00780838		-3.99939
RP11-498C9.16	3.98852	0.00621532		-3.98852
CTC-295J13.3	3.98371	0.0020896		-3.98371
RNU2-13P	3.96351	0.0157266		-3.96351
RP1-84O15.1	3.88558	0.0151765		-3.88558
FSHR	3.8613	0.0064207		-3.8613
NPY5R	3.82101	0.00143429		-3.82101
RP1-241P17.7	3.81694	0.046787		-3.81694
AP000797.4	3.79782	0.00107539		-3.79782
RP11-361K17.2	3.76791	0.00191996		-3.76791
RNU6-1244P	3.75834	0.0142061		-3.75834
AL133249.1	3.71337	0.000799022		-3.71337
RP11-844P9.4	3.69656	0.00109528		-3.69656
RP11-467C18.1	3.69422	0.034829		-3.69422
RP11-456O19.5	3.68276	0.0290381		-3.68276
RP11-52L11.6	3.67616	0.00220464		-3.67616
hsa-mir-3149	3.67451	0.00280101		-3.67451
LEFTY2	3.6366	0.000208531		-3.6366
RP11-744D14.1	3.62324	0.000826233		-3.62324
RP13-395E19.4	3.61791	0.0013102		-3.61791
RP11-87H9.3	3.58574	0.00365923		-3.58574
MIR548AA2	3.57945	0.000211491		-3.57945
FGG	3.57123	0.0289787		-3.57123
CDH19	3.5617	0.00721562		-3.5617
COLEC11	3.56169	0.00027123		-3.56169
SNORD114-19	3.54794	0.00549452		-3.54794
RP11-522B15.3	3.54642	0.00111855		-3.54642
AQP11	3.52516	0.00268057		-3.52516
RP11-475B2.1	3.52385	0.0382005		-3.52385
RP11-302F12.4	3.51298	0.00325379		-3.51298
AC009313.1	3.4836	0.027061		-3.4836
TMEM215	3.47745	0.0174179		-3.47745
PLA2G5	3.47254	0.00189816		-3.47254
CYP19A1	3.46346	0.0396755		-3.46346
DIRAS3	3.45536	6.79659e-05		-3.45536
RP11-143A22.1	3.44759	0.0172149		-3.44759
RP11-324L17.1	3.44507	0.00388933		-3.44507
RP11-478C6.4	3.43797	0.0023651		-3.43797
GSTA1	3.423	0.0031714		-3.423
MIR654	3.41544	0.0453808		-3.41544
LINC00670	3.41121	0.00201219		-3.41121
LEMD1-AS1	3.40666	0.00340724		-3.40666
RP11-5N11.7	3.38995	0.00245734		-3.38995
RP11-269F20.1	3.37992	0.0238184		-3.37992
TCF21	3.36664	0.000229546		-3.36664
AC025811.2	3.35721	0.00743265		-3.35721
RP11-513D4.2	3.33781	0.0266768		-3.33781
KRT8P42	3.33023	0.0263791		-3.33023
CASK-AS1	3.32928	0.0421171		-3.32928
RBAKDN	3.32584	0.0249208		-3.32584
AC006115.6	3.29349	0.0394001		-3.29349
PEG3	3.2798	0.0014671		-3.2798
RNU6-1056P	3.27238	0.0105322		-3.27238
RPL7AP58	3.26045	0.0358596		-3.26045
AC011994.1	3.24674	0.015438		-3.24674
RP11-60I3.4	3.23809	0.0195721		-3.23809
HM13-AS1	3.23027	0.0057292		-3.23027
RP3-507I15.1	3.22442	0.00662823		-3.22442
ATRNL1	3.2053	0.000560728		-3.2053
RP11-963H4.3	3.20351	0.00250231		-3.20351
AC079804.1	3.19494	0.0126322		-3.19494
RNU7-166P	3.19298	0.00357951		-3.19298
CTD-2651B20.5	3.18768	0.0193918		-3.18768
AC093817.1	3.18562	0.0101729		-3.18562
FGL1	3.18519	0.0171665		-3.18519
RNU6-971P	3.18042	0.0115333		-3.18042
MIR3153	3.17148	0.00272216		-3.17148
MIR127	3.16957	0.0173486		-3.16957
RP11-112J1.3	3.16724	0.00410245		-3.16724
RP11-320G24.1	3.14314	0.0161563		-3.14314
RP11-110I1.11	3.12744	0.0456544		-3.12744
RP11-103G8.1	3.12705	0.0486946		-3.12705
CTD-2544N14.3	3.12674	0.004513		-3.12674
MIR377	3.12578	0.0196866		-3.12578
CTD-2531D15.4	3.12389	0.0329872		-3.12389
RP11-663P9.2	3.11611	0.000722306		-3.11611
AC090952.5	3.10271	0.0211304		-3.10271
AP000797.3	3.0919	0.0412426		-3.0919
CTD-2589O24.1	3.08474	0.0117676		-3.08474
MIR329-1	3.08381	0.00401759		-3.08381
KB-1448A5.1	3.08139	0.0106843		-3.08139
RP11-364B14.3	3.07381	0.0496118		-3.07381
EIF2B5-IT1	3.0667	0.00268436		-3.0667
RP11-644K8.1	3.0517	0.0057692		-3.0517
GS1-590J6.2	3.05151	0.00108322		-3.05151
RP11-863P13.1	3.04763	0.0478089		-3.04763
INSL3	3.04105	0.00910808		-3.04105
SERF1B	3.03043	0.00906898		-3.03043
HSPB6	3.02808	5.93e-09		-3.02808
DACH2	3.02774	0.0173186		-3.02774
CTD-2256P15.4	3.02741	0.0054925		-3.02741
RP11-700J17.1	3.0206	0.0112802		-3.0206
RP11-307L14.2	3.01615	0.0418742		-3.01615
HNRNPA1P18	3.00381	0.0117739		-3.00381
SCN7A	2.99847	0.00159521		-2.99847
RP11-295P9.12	2.98951	0.000679488		-2.98951
HSBP1P1	2.98341	0.00217075		-2.98341
AP000221.1	2.98127	0.010315		-2.98127
PRSS35	2.98067	0.00547402		-2.98067
AC025811.1	2.97451	0.0116849		-2.97451
MT1DP	2.96875	0.0474255		-2.96875
AC116533.3	2.95579	0.00974305		-2.95579
GABRG1	2.95242	0.0448832		-2.95242
RP11-17E13.2	2.94746	0.0130761		-2.94746
PLCXD3	2.9449	0.00255954		-2.9449
MKX	2.94213	0.0138651		-2.94213
RP11-552M11.4	2.92457	0.00333325		-2.92457
CTD-2010I16.1	2.924	0.00825195		-2.924
RP11-14I17.1	2.922	0.0423337		-2.922
HMGN2P35	2.9207	0.0333322		-2.9207
AC005041.11	2.91484	0.0355105		-2.91484
RPL21P39	2.91115	0.0396972		-2.91115
OGN	2.90927	0.00121181		-2.90927
RP11-350N15.6	2.9069	0.0218057		-2.9069
DPY19L2P4	2.90149	0.00490198		-2.90149
GNG5P2	2.90033	0.00891053		-2.90033
HS6ST2	2.90018	0.00639572		-2.90018
MTRNR2L13	2.89817	0.00565878		-2.89817
SNORD113-1	2.89302	0.0107997		-2.89302
RP11-464D20.2	2.88655	0.00722701		-2.88655
DNM1P17	2.87744	0.0461759		-2.87744
ENPP6	2.87363	0.00588739		-2.87363
AC016909.2	2.86728	0.00983857		-2.86728
RP11-307L14.1	2.85308	0.00493875		-2.85308
LA16c-444G7.2	2.84849	0.0046635		-2.84849
RN7SL174P	2.84514	0.0489634		-2.84514
RP11-598D12.3	2.84109	0.0336749		-2.84109
LINC00908	2.83906	0.0186342		-2.83906
PGAM4P1	2.8374	0.013134		-2.8374
RP11-756G12.1	2.83597	0.0262892		-2.83597
RP11-535A5.1	2.82992	0.0104308		-2.82992
RP11-22N19.2	2.8298	0.00764241		-2.8298
RNY4P22	2.8273	0.014398		-2.8273
CTD-2626G11.2	2.82666	0.0476247		-2.82666
CTC-487M23.7	2.82413	0.00717524		-2.82413
RP11-6O2.3	2.82203	0.0113366		-2.82203
AC005786.3	2.8206	0.026522		-2.8206
SCUBE1	2.81834	0.00830944		-2.81834
FRRS1L	2.81721	0.0282742		-2.81721
CTC-398G3.1	2.81648	0.0248392		-2.81648
RN7SL854P	2.80105	0.0242155		-2.80105
RN7SL404P	2.78978	0.0103981		-2.78978
MIR136	2.78958	0.0125051		-2.78958
RP11-302B13.1	2.78269	0.0205843		-2.78269
RP11-210K20.2	2.78249	0.0120014		-2.78249
CTD-2199O4.6	2.774	0.0110984		-2.774
AC090427.1	2.77292	0.0346039		-2.77292
TRGV3	2.7708	0.0463069		-2.7708
GAPDHP62	2.76824	0.0082774		-2.76824
RP11-61L19.2	2.76814	0.00908761		-2.76814
MYH11	2.76622	0.000570305		-2.76622
ATP12A	2.7642	0.0320672		-2.7642
RNU6-259P	2.76181	0.0123587		-2.76181
MIR548V	2.75881	0.0215442		-2.75881
C7	2.75776	0.000481568		-2.75776
RNY4P1	2.75467	0.00749358		-2.75467
CTB-193M12.1	2.74945	0.00191896		-2.74945
RP1-12G14.7	2.7429	0.005605		-2.7429
WIPF3	2.72852	1.3434e-05		-2.72852
CTC-260E6.11	2.72222	0.0165594		-2.72222
RP1-251M9.2	2.71852	0.00478535		-2.71852
CTD-2228K2.1	2.71443	0.030389		-2.71443
ZBTB8OSP1	2.71275	0.0433422		-2.71275
RP11-797D24.4	2.71226	0.0014019		-2.71226
RP1-232L24.3	2.70795	0.0405628		-2.70795
PABPC5	2.7053	0.000873888		-2.7053
RPL15P1	2.70379	0.00858094		-2.70379
ECEL1	2.70312	0.00937574		-2.70312
RP11-170M17.2	2.70079	0.00651446		-2.70079
GPM6A	2.69778	0.00217664		-2.69778
KRT8P26	2.686	0.0436983		-2.686
RP11-368J22.2	2.67736	0.0248975		-2.67736
RP11-925D8.3	2.67587	0.034601		-2.67587
AL669831.1	2.67542	0.000962066		-2.67542
RPS4XP13	2.67438	0.00940567		-2.67438
AC002401.1	2.67054	0.038676		-2.67054
OR2D2	2.66986	0.0112172		-2.66986
RNY4P11	2.6601	0.0185808		-2.6601
TIMM8AP1	2.65564	0.0424622		-2.65564
CTC-260E6.2	2.65478	0.0176592		-2.65478
RPS2P28	2.65367	0.041985		-2.65367
RP11-77E14.2	2.65259	0.0365728		-2.65259
RP11-400L8.2	2.65225	0.00356218		-2.65225
LA16c-444G7.1	2.65213	0.00724091		-2.65213
TBC1D4-AS1	2.6516	0.00994086		-2.6516
TMSB15A	2.64825	0.0155718		-2.64825
SNORD115-38	2.64707	0.0480451		-2.64707
RP11-190C22.9	2.64591	0.0111656		-2.64591
RP11-52L11.7	2.63519	0.00236968		-2.63519
RN7SL208P	2.63455	0.0355148		-2.63455
RPL17P19	2.62903	0.0138184		-2.62903
RNU6-124P	2.62643	0.021114		-2.62643
RNY3P4	2.62631	0.00534958		-2.62631
RP11-119H12.1	2.62083	0.00937952		-2.62083
HLF	2.61619	0.000384814		-2.61619
MIR137HG	2.61559	0.042403		-2.61559
RP11-490H9.1	2.61268	0.0170039		-2.61268
TDGF1	2.60969	0.00619766		-2.60969
RP11-815N9.2	2.60915	0.00823599		-2.60915
RNU6-606P	2.60841	0.0230028		-2.60841
URAHP	2.60719	0.00691583		-2.60719
RP11-28H5.2	2.60457	0.00586159		-2.60457
NPY6R	2.60252	0.0328431		-2.60252
SNX6P1	2.60159	0.0263709		-2.60159
RP11-497H16.5	2.59599	0.0128204		-2.59599
GSTM5	2.59095	0.0273894		-2.59095
AP000857.2	2.59062	0.0160261		-2.59062
CCDC75P1	2.58937	0.00626655		-2.58937
LINC00704	2.58926	0.0327373		-2.58926
RP11-219D15.3	2.58901	0.0158222		-2.58901
RP4-735C1.4	2.58738	0.0306165		-2.58738
CTD-2536I1.1	2.5868	9.59744e-05		-2.5868
RP11-517B11.4	2.582	0.0117265		-2.582
RP1-127C7.6	2.58076	0.0169397		-2.58076
RNY4P6	2.57842	0.00403649		-2.57842
RP11-434O22.2	2.57589	0.00800751		-2.57589
MIR4306	2.57458	0.00680376		-2.57458
AC099535.4	2.5724	0.0222416		-2.5724
IFITM4P	2.57225	0.0167511		-2.57225
AC130888.1	2.57196	0.0151534		-2.57196
AC007557.1	2.5714	0.0176072		-2.5714
RP11-508N22.13	2.56811	0.0197477		-2.56811
RXRG	2.56804	0.036694		-2.56804
AC011385.2	2.56578	0.00623801		-2.56578
RP11-566K19.6	2.56362	0.0374072		-2.56362
RP11-629B11.4	2.56278	0.0033144		-2.56278
MIR3175	2.55877	0.014583		-2.55877
RP11-761I4.4	2.55179	0.014437		-2.55179
RP11-820I16.4	2.54785	0.0230658		-2.54785
MIR1-2	2.54641	0.0158833		-2.54641
JPH4	2.54556	0.00102068		-2.54556
ACADL	2.54239	0.0296942		-2.54239
CTD-2651B20.4	2.52551	0.0318793		-2.52551
LINC00890	2.52536	0.0250913		-2.52536
RP11-354A14.1	2.52035	0.0419328		-2.52035
RPL17P33	2.52027	0.00828617		-2.52027
RP11-227G15.9	2.51775	0.0116228		-2.51775
RPS15AP11	2.51282	0.00390896		-2.51282
RNU6-267P	2.50859	0.0380808		-2.50859
RP11-958F21.1	2.50536	0.0433831		-2.50536
ESR2	2.50536	0.000505061		-2.50536
MTND4P24	2.50322	0.00769371		-2.50322
FMO1	2.503	0.0199673		-2.503
EFCC1	2.49884	2.8044e-05		-2.49884
MIR561	2.49799	0.0296266		-2.49799
RNY4P25	2.49276	0.0195234		-2.49276
RNU6-375P	2.48883	0.0203648		-2.48883
RP5-1147A1.1	2.4888	0.0032924		-2.4888
RP11-239L20.6	2.48243	0.0274721		-2.48243
RP11-79P5.9	2.47972	0.00572151		-2.47972
LHX9	2.47868	0.00666014		-2.47868
RPS15P9	2.47608	0.0237268		-2.47608
COX7CP1	2.47158	0.0332325		-2.47158
AC005954.3	2.47064	0.00311129		-2.47064
RP11-346I3.2	2.46791	0.0119916		-2.46791
PABPC5-AS1	2.46719	0.0223406		-2.46719
RP11-798K3.4	2.46693	0.0118613		-2.46693
RP11-455F5.4	2.46304	0.011742		-2.46304
ARMCX3-AS1	2.46169	0.0234304		-2.46169
RP11-94C24.8	2.4577	0.00444553		-2.4577
RNU5F-6P	2.45716	0.0115483		-2.45716
RPL29P11	2.45023	0.0236889		-2.45023
IRS4	2.44988	0.0388638		-2.44988
RP11-365O10.1	2.44845	0.0131105		-2.44845
MIR621	2.4475	0.0151255		-2.4475
RP11-353H3.1	2.44249	0.0206837		-2.44249
RP11-299L17.3	2.44213	0.0440418		-2.44213
HINT1P1	2.43826	0.0381017		-2.43826
RP11-165A20.3	2.42931	0.0118093		-2.42931
CTD-2369P2.5	2.42744	0.0444876		-2.42744
RP3-363L9.1	2.42703	0.0361699		-2.42703
RNY4P18	2.42531	0.00363471		-2.42531
OR2X1P	2.42137	0.0238446		-2.42137
RP11-84A1.1	2.42096	0.00322355		-2.42096
ARPC3P2	2.42065	0.01599		-2.42065
CDHR1	2.41928	0.00456087		-2.41928
RP11-462G2.2	2.41719	0.00286319		-2.41719
FGF22	2.41642	0.0176407		-2.41642
RP11-101E13.5	2.4119	0.0141589		-2.4119
RP11-1058N17.1	2.41057	0.00971563		-2.41057
RP11-145M9.6	2.40923	0.0185055		-2.40923
RPS10L	2.40514	0.0240098		-2.40514
SIGLEC16	2.40337	0.0435143		-2.40337
DES	2.40266	0.00502634		-2.40266
RP11-351I24.1	2.40176	0.0306951		-2.40176
VWC2	2.39782	0.0136687		-2.39782
RNU6-1128P	2.39718	0.0379366		-2.39718
PTP4A1P6	2.38871	0.0252158		-2.38871
AC016251.1	2.38116	0.0421798		-2.38116
AC093390.1	2.38083	0.0452404		-2.38083
MIR571	2.38038	0.0464343		-2.38038
CASQ2	2.37713	0.00218269		-2.37713
RN7SKP195	2.37471	0.0123541		-2.37471
RP11-261C10.2	2.37401	0.0110553		-2.37401
MIR103A1	2.3727	0.0168006		-2.3727
RP5-855F14.1	2.36901	0.0435338		-2.36901
RP11-475J5.4	2.36888	0.0344576		-2.36888
RP11-255C15.3	2.36488	0.0143261		-2.36488
RP11-406H21.2	2.36257	0.0424406		-2.36257
RP11-522L3.5	2.36244	0.0221303		-2.36244
RP11-522L3.3	2.35904	0.00687352		-2.35904
RNY3P6	2.35761	0.0152067		-2.35761
HNRNPA1P42	2.35641	0.0212779		-2.35641
MIR5706	2.35509	0.00568137		-2.35509
TCEAL7	2.35481	0.0146454		-2.35481
GDNF-AS1	2.35281	0.0449502		-2.35281
RP11-141M1.1	2.34971	0.00199757		-2.34971
RP5-926E3.1	2.3497	0.0335544		-2.3497
STK4-AS1	2.34565	0.0317252		-2.34565
RPL17P22	2.3451	0.0283681		-2.3451
AC064875.2	2.3439	0.0122597		-2.3439
RP4-706A16.3	2.34361	0.00270873		-2.34361
RN7SL515P	2.34143	0.0337875		-2.34143
FAM131C	2.33822	0.0159929		-2.33822
RN7SL273P	2.33568	0.0312364		-2.33568
MIR545	2.33543	0.0154932		-2.33543
RNA5SP488	2.33316	0.0226029		-2.33316
NAP1L3	2.33065	0.0195289		-2.33065
RNU6-519P	2.32991	0.0240107		-2.32991
RP4-612B15.2	2.32806	0.00543046		-2.32806
AC022558.1	2.32786	0.039139		-2.32786
CTD-2270F17.1	2.32577	0.00467672		-2.32577
RP11-572P18.1	2.32374	0.00995469		-2.32374
MIR659	2.32161	0.00828695		-2.32161
RP11-999E24.3	2.31794	0.00398771		-2.31794
RP11-1260E13.4	2.31721	0.000240709		-2.31721
MIR548O2	2.3165	0.0135745		-2.3165
TCEAL3-AS1	2.31629	0.00249862		-2.31629
ZNF32-AS1	2.31622	0.0149443		-2.31622
RNY4P5	2.31274	0.00496968		-2.31274
RP11-57H12.2	2.31204	0.0221386		-2.31204
NIP7P3	2.30467	0.0410506		-2.30467
SALL1	2.3007	0.0201497		-2.3007
RP13-131K19.6	2.29965	0.0219593		-2.29965
CTD-2036P10.3	2.29928	0.018313		-2.29928
PGR	2.29617	0.0135979		-2.29617
RP11-477N3.1	2.29564	0.0232739		-2.29564
RP11-328D5.1	2.29531	0.0179255		-2.29531
RP11-407N17.5	2.29314	0.00697993		-2.29314
RP11-260M19.2	2.28999	0.0386776		-2.28999
FHL5	2.28845	0.0171365		-2.28845
RP11-157L3.4	2.28822	0.0104987		-2.28822
RNA5SP300	2.28776	0.00726553		-2.28776
CTD-2184D3.1	2.2848	0.0409909		-2.2848
RP11-74C13.4	2.28402	0.0286282		-2.28402
RPS2P35	2.28368	0.0143661		-2.28368
ADAMTS9-AS1	2.2806	0.0453865		-2.2806
RP5-857K21.11	2.28014	0.00394845		-2.28014
C14orf144	2.27765	0.0376706		-2.27765
RP11-564A8.4	2.27727	0.0289107		-2.27727
MIR4461	2.27709	0.0260578		-2.27709
AL137846.1	2.27529	0.00618567		-2.27529
UBE2MP1	2.27324	0.0178352		-2.27324
AC079922.2	2.27302	0.00550115		-2.27302
LINC01135	2.27224	0.00940907		-2.27224
AL583842.3	2.26613	0.0289568		-2.26613
MIR4796	2.26585	0.0151648		-2.26585
RP11-138H8.6	2.26478	0.0133777		-2.26478
RNU6-1199P	2.26403	0.00564671		-2.26403
RP11-367N14.3	2.26172	0.0495976		-2.26172
CTC-250I14.3	2.26083	0.0193657		-2.26083
TSLP	2.26027	0.0301141		-2.26027
RNU6-734P	2.25932	0.03259		-2.25932
RP11-269C4.1	2.25885	0.0194058		-2.25885
AK4P4	2.25806	0.00819694		-2.25806
SNORD112	2.25704	0.0366286		-2.25704
RP6-109B7.4	2.25414	0.00449969		-2.25414
GATM	2.25396	7.10136e-05		-2.25396
RP11-925D8.5	2.25178	0.0162837		-2.25178
CTD-2375G15.1	2.24942	0.0384307		-2.24942
LINC00924	2.24701	0.000971448		-2.24701
AC012531.25	2.24446	0.00274122		-2.24446
RP11-305O4.3	2.24099	0.0109013		-2.24099
MAP1LC3C	2.24001	0.00844895		-2.24001
PPP1R11P2	2.23934	0.0176143		-2.23934
VN2R10P	2.23754	0.0161074		-2.23754
SEMA3B-AS1	2.23664	0.0367839		-2.23664
WNT5A	2.23488	7.16975e-05		-2.23488
RP11-388C12.8	2.22886	0.0351913		-2.22886
ADAMTS19	2.22843	0.0312231		-2.22843
ISCA1P1	2.22743	0.0461172		-2.22743
MMRN1	2.22736	0.0107408		-2.22736
RN7SL62P	2.22723	0.0127071		-2.22723
RP11-164N3.2	2.227	0.0355559		-2.227
RNU6-879P	2.22644	0.0363519		-2.22644
RP11-626G11.1	2.22643	0.0261634		-2.22643
RNU2-22P	2.21842	0.0350132		-2.21842
GULOP	2.21778	0.0331922		-2.21778
BAMBI	2.21746	0.0232544		-2.21746
RNU6-762P	2.21557	0.0306326		-2.21557
OR51B2	2.21532	0.02474		-2.21532
OR7A19P	2.21462	0.0153419		-2.21462
MTND6P21	2.21303	0.00096646		-2.21303
PIGFP1	2.21275	0.00446998		-2.21275
RP11-45P15.4	2.21168	0.00799361		-2.21168
CLDN23	2.21109	0.0383027		-2.21109
RP11-179B15.5	2.20884	0.0334112		-2.20884
RP1-288H2.4	2.20591	0.0383479		-2.20591
RP11-178F10.1	2.20564	0.0250883		-2.20564
RPL7AP10	2.20493	0.0144269		-2.20493
RNU6-833P	2.20357	0.00260405		-2.20357
RP5-942I16.1	2.19435	0.0180435		-2.19435
RP11-397O4.1	2.19435	0.0338808		-2.19435
RP11-52L11.4	2.19248	0.0406535		-2.19248
RN7SL164P	2.19116	0.0318956		-2.19116
FAM153B	2.1906	0.0148471		-2.1906
RP11-371E8.4	2.19045	0.00169256		-2.19045
RP11-385J23.1	2.18969	0.0222843		-2.18969
RP11-538D16.2	2.1878	0.0207997		-2.1878
ACR	2.18724	0.0179923		-2.18724
RPS15AP38	2.18617	0.00393777		-2.18617
AC010761.6	2.18607	0.0478836		-2.18607
AF222686.1	2.18578	0.0312565		-2.18578
AB015752.3	2.17558	0.0360481		-2.17558
RASL11B	2.17408	0.00122092		-2.17408
RP11-446H18.6	2.17341	0.00617861		-2.17341
ZDHHC15	2.17299	0.0264971		-2.17299
CTD-3025N20.3	2.17158	0.0133678		-2.17158
CTD-2659N19.9	2.17152	0.0420377		-2.17152
RN7SL583P	2.17151	0.0213695		-2.17151
RP11-386I14.3	2.1692	0.00745693		-2.1692
LA16c-325D7.2	2.16355	0.0242017		-2.16355
AC092316.1	2.16308	0.0285858		-2.16308
RNU6-610P	2.16148	0.0262136		-2.16148
RP11-722E23.2	2.16058	0.000900251		-2.16058
RP11-680F20.6	2.16036	0.0484708		-2.16036
RP11-292F22.7	2.15818	0.0378293		-2.15818
AC078819.1	2.15704	0.0422809		-2.15704
U91328.20	2.15552	0.011793		-2.15552
AC114877.3	2.15249	0.0423475		-2.15249
MTND6P6	2.15149	0.00121913		-2.15149
ZFY	2.14962	0.0487083		-2.14962
RP11-505K9.3	2.14598	0.0216235		-2.14598
RP5-1052M9.1	2.14519	0.025117		-2.14519
RP11-84C13.2	2.1423	0.0118296		-2.1423
MTND1P32	2.13827	0.00040712		-2.13827
RP11-382D12.2	2.1362	0.00957276		-2.1362
RP3-340B19.2	2.13307	0.00608704		-2.13307
PTGES3P4	2.12922	0.0320675		-2.12922
FOXD4L4	2.12523	0.0448655		-2.12523
LOC100421166	2.12276	0.00607268		-2.12276
AC064836.3	2.12005	0.0230769		-2.12005
RP11-71E19.1	2.11895	0.0219987		-2.11895
CTD-2583A14.1	2.11068	0.0269433		-2.11068
AP002381.2	2.10839	0.0214871		-2.10839
AC026150.5	2.10838	0.00893901		-2.10838
MIR4473	2.10812	0.0487044		-2.10812
GPR88	2.1079	0.0364798		-2.1079
RP11-522L3.4	2.10421	0.0230309		-2.10421
RNU6-1155P	2.10395	0.0492286		-2.10395
RP11-524D16__A.3	2.10174	0.0451035		-2.10174
SFRP1	2.09814	0.0110777		-2.09814
RP11-111K18.2	2.09802	0.047426		-2.09802
AC004017.1	2.09613	0.0238198		-2.09613
RGS7	2.09567	0.00802643		-2.09567
RP11-279O9.4	2.09515	0.00786993		-2.09515
C2orf73	2.09295	0.0131289		-2.09295
RPS4XP3	2.09165	0.000207469		-2.09165
PPP1R3C	2.09072	0.0480691		-2.09072
SLC25A21-AS1	2.09018	0.0332096		-2.09018
RP11-207F8.1	2.08877	0.0286893		-2.08877
NUTM2A	2.08849	0.039684		-2.08849
RP11-38G5.4	2.08565	0.0337877		-2.08565
NDNF	2.08361	0.00964315		-2.08361
RNA5SP296	2.07986	0.00634599		-2.07986
AC004004.2	2.07778	0.018606		-2.07778
KCNMB2	2.07646	0.00755967		-2.07646
RP11-309L24.4	2.07593	0.0229655		-2.07593
RP11-326C3.7	2.0752	0.0418456		-2.0752
RGS7BP	2.07494	0.000974767		-2.07494
RPL34P1	2.07217	0.0204864		-2.07217
RNU6-853P	2.07198	0.0387479		-2.07198
PTPRZ1	2.07173	0.0355707		-2.07173
OR52T1P	2.07149	0.000272459		-2.07149
GS1-421I3.4	2.07042	0.0366868		-2.07042
EIF4BP4	2.07008	0.0177818		-2.07008
SNORD113	2.06993	0.0236599		-2.06993
NUDT19P5	2.06858	0.0180425		-2.06858
CST5	2.06778	0.0121543		-2.06778
PCP4L1	2.06776	0.0219374		-2.06776
RNU6-767P	2.0671	0.0479019		-2.0671
NR2F2-AS1	2.06378	0.00142279		-2.06378
RP11-113A11.1	2.06318	0.0259661		-2.06318
SNORD14	2.06232	0.0189612		-2.06232
AC007193.8	2.06014	0.0126479		-2.06014
RP11-522L3.11	2.06002	0.0177971		-2.06002
AC092295.4	2.05774	0.0480525		-2.05774
RP11-3B7.1	2.0568	0.0437696		-2.0568
CNTN1	2.05266	0.0156742		-2.05266
RP11-439K3.3	2.05252	0.0343882		-2.05252
AC007040.11	2.05137	0.0469904		-2.05137
ANG	2.05108	0.0456041		-2.05108
RNY4P31	2.051	0.0351408		-2.051
MTND4P9	2.05018	0.0386201		-2.05018
SBSPON	2.04818	0.00973667		-2.04818
PGM5P2	2.04812	0.0286228		-2.04812
COX7A2P1	2.04749	0.0137748		-2.04749
AC002066.1	2.04404	0.0278055		-2.04404
GAPDHP32	2.04395	0.0268901		-2.04395
RP11-192H23.6	2.04358	0.0476388		-2.04358
MTND1P11	2.03794	0.0156623		-2.03794
AP000344.3	2.03555	0.00718142		-2.03555
AC004854.4	2.03498	0.0169576		-2.03498
RNA5SP177	2.02933	0.0125685		-2.02933
LINC01116	2.02783	0.00190179		-2.02783
TRABD2A	2.0267	0.0040186		-2.0267
ADAMTS9-AS2	2.02504	0.0043633		-2.02504
RP4-630A11.3	2.02275	0.0383788		-2.02275
TPT1P4	2.0163	0.0298472		-2.0163
RP11-332H14.1	2.01372	0.0390636		-2.01372
RNU6-1112P	2.00799	0.00836835		-2.00799
RPL9P3	2.00793	0.032154		-2.00793
RP11-700J17.2	2.00779	0.0318792		-2.00779
SMAD9	2.00338	0.000202594		-2.00338
RP11-571L19.8	2.0024	0.0109094		-2.0024
RPS3P6	2.0021	0.00864186		-2.0021
CTC-457E21.1	2.00075	0.000677873		-2.00075
AC002553.1	1.99756	0.0233209		-1.99756
TNXB	1.99705	0.0031377		-1.99705
RP11-348H3.5	1.99652	0.03633		-1.99652
RP11-360P21.2	1.99349	0.0491061		-1.99349
GRPEL2-AS1	1.99279	0.0465199		-1.99279
RNU6-479P	1.99016	0.0140151		-1.99016
SYNPO2	1.98353	0.000787983		-1.98353
RERGL	1.97863	0.0455148		-1.97863
RNY4P14	1.97782	0.0338934		-1.97782
NPY1R	1.97633	0.025148		-1.97633
AC012065.7	1.97514	0.0262155		-1.97514
RP11-573G6.9	1.968	0.0408019		-1.968
RP11-322E11.5	1.96773	0.0243771		-1.96773
CTD-2256P15.5	1.96402	0.0341009		-1.96402
KRT18P55	1.96196	0.0248245		-1.96196
RPL7P47	1.96128	0.0266264		-1.96128
RP13-258O15.1	1.96093	0.00228655		-1.96093
MIR4794	1.96025	0.0331506		-1.96025
CAPN6	1.95971	0.0416981		-1.95971
RNY4P19	1.95624	0.0183039		-1.95624
C12orf68	1.95555	0.00598232		-1.95555
RNU6-807P	1.95401	0.0413103		-1.95401
RP11-587D21.4	1.95322	0.0465431		-1.95322
RP11-281O15.7	1.95307	0.0219077		-1.95307
AL355531.1	1.95216	0.0221421		-1.95216
RNU6-549P	1.95206	0.0157701		-1.95206
CSDC2	1.95072	0.0117893		-1.95072
RP11-320M16.1	1.95011	0.014949		-1.95011
FXYD2	1.94854	0.00653409		-1.94854
AC099048.1	1.94825	0.007377		-1.94825
RP11-712B9.5	1.94671	0.0349725		-1.94671
RP11-61L19.3	1.94656	0.0129793		-1.94656
RNU7-80P	1.94577	0.00832194		-1.94577
RP11-241I20.1	1.9455	0.0261725		-1.9455
RP11-265E18.1	1.94511	0.0115523		-1.94511
SERPINE2	1.94489	0.00735395		-1.94489
AL139333.1	1.94461	0.0288429		-1.94461
SERTM1	1.94365	0.0420542		-1.94365
NMUR1	1.93566	0.029622		-1.93566
MIR3128	1.93269	0.00639956		-1.93269
RNU6-875P	1.93234	0.0186204		-1.93234
HSD11B1	1.93112	0.00391769		-1.93112
MIR3671	1.92895	0.0245773		-1.92895
AL356756.1	1.92851	0.0460788		-1.92851
RP11-696L21.2	1.92832	0.0414864		-1.92832
RP11-219C20.3	1.92438	0.0438406		-1.92438
CTD-2267D19.2	1.92436	0.0293531		-1.92436
RNU6-1176P	1.92156	0.0206274		-1.92156
CTD-2340D6.1	1.91855	0.00723536		-1.91855
RAB1C	1.91813	0.0298516		-1.91813
SDCBPP3	1.9179	0.0370754		-1.9179
PRDX2P1	1.91645	0.0379733		-1.91645
MIR568	1.91278	0.00210151		-1.91278
RP11-245J9.4	1.91266	0.0490981		-1.91266
RP11-400K9.4	1.91203	0.00315956		-1.91203
RNY4P2	1.91158	0.00988009		-1.91158
NGF	1.91008	0.0238144		-1.91008
SNORD115-5	1.90837	0.0441866		-1.90837
ITM2A	1.90562	0.00863223		-1.90562
RP11-348F1.2	1.90547	0.0278394		-1.90547
RP11-204M4.2	1.90424	0.039024		-1.90424
CADPS	1.90377	0.0116294		-1.90377
MIR3162	1.90354	0.00837793		-1.90354
RP11-182J23.1	1.90132	0.0168669		-1.90132
RP11-159H22.2	1.90035	0.0344665		-1.90035
PSMA6P1	1.89547	0.0481754		-1.89547
RP1-120G22.11	1.894	0.0244382		-1.894
CNTNAP2	1.89125	0.0370464		-1.89125
F10	1.88876	0.00101634		-1.88876
CTA-14H9.5	1.88718	0.0167947		-1.88718
RP11-796G6.1	1.88449	0.00111132		-1.88449
RP11-25I15.1	1.88088	0.048441		-1.88088
FPGT-TNNI3K	1.88044	0.00140455		-1.88044
RN7SL812P	1.88038	0.0337319		-1.88038
RP11-362J17.1	1.87838	0.0419597		-1.87838
RNU7-113P	1.87837	0.0387549		-1.87837
AL591069.1	1.87578	0.0284122		-1.87578
LINC00167	1.87401	0.0446781		-1.87401
RP11-68I18.10	1.87296	0.0418989		-1.87296
RP11-231I16.1	1.87024	0.0485477		-1.87024
RP1-127D3.4	1.8681	0.0385035		-1.8681
WISP2	1.86767	0.0439343		-1.86767
IGFN1	1.86741	0.0346909		-1.86741
RP11-390K5.1	1.86571	0.0383994		-1.86571
MIR345	1.86549	0.037401		-1.86549
CTD-2553L13.4	1.86326	0.0393458		-1.86326
MIR887	1.86299	0.0418994		-1.86299
FNDC4	1.8531	0.00867333		-1.8531
LEPREL1	1.8526	0.00194943		-1.8526
RP11-532M24.1	1.85229	0.0396654		-1.85229
RNU4ATAC18P	1.84737	0.0309922		-1.84737
MCFD2P1	1.84361	0.0453083		-1.84361
TCF23	1.84168	0.0115993		-1.84168
TGFB2	1.84133	0.00149194		-1.84133
MT-ATP8	1.83661	3.67837e-05		-1.83661
AC109333.10	1.83571	0.0474182		-1.83571
LRRC70	1.83348	0.0356287		-1.83348
RP11-168F9.2	1.83307	0.0367803		-1.83307
HOXC6	1.83292	0.00944554		-1.83292
MIR370	1.83143	0.0366153		-1.83143
RNY3P1	1.82868	0.00041756		-1.82868
CTD-2302E22.4	1.82768	0.0416327		-1.82768
SEPT7P8	1.82434	0.0186543		-1.82434
MTND1P23	1.82172	0.0125892		-1.82172
RP11-395N3.1	1.81863	0.023559		-1.81863
PCP4	1.81858	0.0496725		-1.81858
RNU11-6P	1.81806	0.0385505		-1.81806
AP000344.4	1.81512	0.0213949		-1.81512
RP5-850O15.4	1.81349	0.0303894		-1.81349
NPB	1.81298	0.0338646		-1.81298
AC100830.4	1.81114	0.0171299		-1.81114
RN7SL23P	1.81027	0.00025286		-1.81027
MGARP	1.81018	0.0166803		-1.81018
RPL34P6	1.81003	0.0470803		-1.81003
CTC-451P13.1	1.80988	0.0365063		-1.80988
RP11-963H4.5	1.80934	0.0425218		-1.80934
NCAM1	1.80843	0.00721159		-1.80843
RP11-514F3.5	1.80641	0.028361		-1.80641
RPS6KA6	1.80606	0.0236415		-1.80606
RTN3P1	1.80485	0.0172513		-1.80485
RP11-24B19.3	1.80247	0.0212534		-1.80247
KANSL1-AS1	1.80242	0.0262165		-1.80242
OR7E100P	1.80217	0.0440139		-1.80217
RP11-141M1.3	1.80184	0.000534074		-1.80184
RNU6-581P	1.79483	0.0487057		-1.79483
RPS20P35	1.79352	0.0122105		-1.79352
RP11-389G6.3	1.79195	0.0154801		-1.79195
VN1R84P	1.78988	0.047638		-1.78988
RNY4	1.78941	0.000566342		-1.78941
RP5-916O11.2	1.78807	0.0375431		-1.78807
RP11-134G8.7	1.78608	0.0397768		-1.78608
AL132709.8	1.78421	0.0337157		-1.78421
RP11-888D10.3	1.7831	0.0213459		-1.7831
AC007292.1	1.78308	0.0130572		-1.78308
RP11-613D13.4	1.78059	0.0143966		-1.78059
PROX1	1.78048	0.00515866		-1.78048
RPL21P28	1.77629	0.0220998		-1.77629
ANGPTL1	1.7758	0.0021836		-1.7758
VSTM4	1.77043	0.0017923		-1.77043
SERPINA3	1.76914	0.0475627		-1.76914
MIR4642	1.76806	0.00864829		-1.76806
AC079250.1	1.76635	0.0315314		-1.76635
TMEM246	1.76412	0.0282266		-1.76412
LRRC2	1.76405	0.0028414		-1.76405
RP11-2E17.2	1.75803	0.0130847		-1.75803
MAOB	1.75637	0.00901481		-1.75637
CTC-268N12.3	1.75184	0.0273588		-1.75184
RNU6-603P	1.75178	0.0074703		-1.75178
RNU6-925P	1.75168	0.0100332		-1.75168
RP11-105N14.1	1.7516	0.0191838		-1.7516
RP11-685B14.1	1.74981	0.0464505		-1.74981
ADAM23	1.74874	0.000552314		-1.74874
RP11-118K6.3	1.74387	0.0428674		-1.74387
GPBAR1	1.74376	0.012933		-1.74376
LINC00896	1.7432	0.0376618		-1.7432
MIR4482-1	1.74285	0.0326918		-1.74285
MTND4P32	1.74166	0.00156892		-1.74166
RP5-855D21.2	1.7388	0.0376933		-1.7388
LRRC3B	1.73794	0.0133585		-1.73794
RNY1	1.73452	0.000560355		-1.73452
RP11-569A11.1	1.7332	0.0261164		-1.7332
ARHGAP31-AS1	1.73275	0.0394149		-1.73275
CTC-338M12.6	1.732	0.0454906		-1.732
RP11-49I11.2	1.72994	0.0016549		-1.72994
SCARA5	1.72829	0.00845018		-1.72829
RP11-190C22.1	1.72759	0.038886		-1.72759
AL441988.1	1.72682	3.78325e-05		-1.72682
RP11-32P22.1	1.72533	0.000864942		-1.72533
CD302	1.72045	0.000113056		-1.72045
AC023490.1	1.71618	0.0387252		-1.71618
RP11-434B12.1	1.71615	0.018802		-1.71615
MIR616	1.71352	0.0303982		-1.71352
FOXC2	1.71338	0.000941305		-1.71338
RP11-209D14.4	1.71129	0.000298035		-1.71129
RP11-153M7.5	1.70982	0.031399		-1.70982
CACNA1H	1.7096	0.00419133		-1.7096
NR2F2	1.70897	0.00195666		-1.70897
RP11-554A11.6	1.70827	0.0331862		-1.70827
RP3-452M16.1	1.70802	0.041214		-1.70802
RP3-327A19.5	1.70723	0.0338935		-1.70723
RNU7-124P	1.7044	0.0104816		-1.7044
RAB9B	1.70439	0.00734045		-1.70439
RP11-38P22.2	1.70386	0.000503883		-1.70386
RNU6-360P	1.7025	0.0193403		-1.7025
RNU6-703P	1.70229	0.00662411		-1.70229
PLN	1.69944	0.0200151		-1.69944
AC007966.1	1.69916	0.0360849		-1.69916
RNU6ATAC30P	1.69905	0.0416594		-1.69905
RP11-535K18.2	1.6961	0.0474239		-1.6961
NRG2	1.69498	0.00885037		-1.69498
RP11-231G3.1	1.69266	0.000765527		-1.69266
AC027307.3	1.69228	0.0404758		-1.69228
PCSK6	1.69038	0.0107696		-1.69038
TPT1P9	1.68973	0.00108607		-1.68973
RP11-720N19.2	1.6893	0.0230487		-1.6893
SLC7A2	1.68711	0.0261574		-1.68711
RP11-427M20.1	1.68687	0.0414256		-1.68687
CLEC3B	1.68625	0.0418046		-1.68625
PON3	1.68144	0.0301866		-1.68144
OR52H1	1.68043	0.000629796		-1.68043
RP11-90P5.5	1.68001	0.0143039		-1.68001
RP1-128M12.3	1.67903	0.0257881		-1.67903
CCDC3	1.67882	0.000548725		-1.67882
RNU6-789P	1.67873	0.0356411		-1.67873
FGF2	1.67603	0.00762864		-1.67603
RP11-156N15.1	1.67462	0.0294894		-1.67462
MORF4L2-AS1	1.67344	0.00421163		-1.67344
AC016700.5	1.67124	0.0416916		-1.67124
RNA5SP372	1.67051	0.0419077		-1.67051
CPED1	1.66975	0.00259937		-1.66975
U91328.22	1.66929	0.0435247		-1.66929
RN7SL786P	1.6681	0.0365602		-1.6681
RP11-206L10.8	1.66733	0.00428228		-1.66733
RPL39P3	1.66448	0.00555725		-1.66448
RP11-301G23.1	1.66408	0.0195807		-1.66408
RP11-843P14.2	1.66135	0.0312156		-1.66135
CTC-297N7.5	1.66031	0.0366867		-1.66031
CMBL	1.65575	0.00191512		-1.65575
GSTM3	1.65345	0.00919777		-1.65345
RP11-91P24.5	1.65215	0.00404154		-1.65215
CTD-2105E13.13	1.64958	0.0359523		-1.64958
WNT2B	1.64918	0.0251392		-1.64918
MPV17L	1.64814	0.00067261		-1.64814
GOLGA8M	1.64633	0.00612414		-1.64633
MTND5P26	1.64412	0.00403211		-1.64412
MIR103A2	1.64398	0.0196009		-1.64398
RP11-187O7.1	1.64367	0.0297185		-1.64367
AF129408.17	1.64208	0.0268359		-1.64208
RNU6ATAC14P	1.64061	0.0402969		-1.64061
OR7E47P	1.64033	0.0147642		-1.64033
ARHGAP6	1.63981	0.00193646		-1.63981
RP11-16E18.1	1.63947	0.0151619		-1.63947
RNY4P7	1.63904	0.00675067		-1.63904
RP1-40G4P.1	1.63486	0.0330497		-1.63486
ALG9-IT1	1.63138	0.0190507		-1.63138
AC009963.6	1.63136	0.0480409		-1.63136
SYPL2	1.62862	0.010605		-1.62862
UBXN8	1.62835	0.00515878		-1.62835
TMEM150C	1.62592	0.00148582		-1.62592
HTR2B	1.62368	0.00207773		-1.62368
RP11-712L6.5	1.62327	0.0272734		-1.62327
RP11-235E17.3	1.62302	0.0119746		-1.62302
RPL23AP69	1.62255	0.027896		-1.62255
KLHL4	1.61631	0.00941821		-1.61631
RP11-522L3.6	1.61585	0.0385351		-1.61585
EMILIN3	1.61493	0.0125689		-1.61493
RP11-498D10.3	1.61455	0.0382087		-1.61455
RP11-769N19.2	1.61447	0.00649731		-1.61447
PRELP	1.61382	0.00206286		-1.61382
MIR4767	1.6121	0.0188662		-1.6121
CDO1	1.60559	0.00621721		-1.60559
RP5-857K21.7	1.60515	0.0337213		-1.60515
SDPR	1.60208	0.00859669		-1.60208
MIR4803	1.5995	0.0427209		-1.5995
RP11-158M2.5	1.59925	0.0452462		-1.59925
RP11-206L10.10	1.59917	0.0424087		-1.59917
RP1-137D17.2	1.59334	0.00582819		-1.59334
RNU6-444P	1.59273	0.0421685		-1.59273
RP11-532F6.3	1.59256	0.00888802		-1.59256
RPL5P5	1.59028	0.0401569		-1.59028
SNRPGP10	1.59007	0.0438583		-1.59007
MYOZ2	1.58692	0.0407948		-1.58692
RP11-754B17.1	1.57923	0.0498023		-1.57923
ABCA10	1.5777	0.00957178		-1.5777
AC139768.1	1.57474	0.0324814		-1.57474
CAMK2N1	1.57213	0.00693068		-1.57213
ASXL3	1.56939	0.0300566		-1.56939
RP11-11C20.3	1.56849	0.0220884		-1.56849
RNU6-750P	1.56802	0.0380818		-1.56802
REEP6	1.56635	0.0164422		-1.56635
RP11-458D21.6	1.56385	0.00979644		-1.56385
RP11-49I11.1	1.56383	0.043198		-1.56383
RP4-717I23.2	1.56022	0.00247322		-1.56022
AC005534.6	1.56016	0.0239928		-1.56016
RP11-1136G11.6	1.55769	0.0370642		-1.55769
MIR3188	1.55763	0.0489623		-1.55763
CYP11A1	1.55734	0.042402		-1.55734
RP11-230C9.2	1.55681	0.01053		-1.55681
RP11-50B3.4	1.5553	0.0254348		-1.5553
USMG5P1	1.55256	0.0423526		-1.55256
CTD-3035D6.1	1.5512	0.00106181		-1.5512
NRXN2	1.55037	0.000431294		-1.55037
RNU6-1327P	1.54991	0.0131807		-1.54991
RN7SL20P	1.54947	0.0187737		-1.54947
ZHX1-C8ORF76	1.54887	0.0411757		-1.54887
SYTL4	1.54765	0.0115273		-1.54765
PDGFRA	1.54675	0.0141081		-1.54675
FAM133A	1.54593	0.0219029		-1.54593
BMP6	1.54293	0.0118118		-1.54293
MAMDC2	1.54255	0.0192115		-1.54255
SLC16A14	1.5418	0.000516207		-1.5418
TSPAN6	1.54068	3.36e-06		-1.54068
RP11-571M6.17	1.54005	0.0271243		-1.54005
DUSP26	1.53967	0.0156481		-1.53967
C10orf62	1.53535	0.0481029		-1.53535
TMEM220	1.53411	0.0029953		-1.53411
MTND2P28	1.53147	0.00396286		-1.53147
ABCG2	1.53128	0.000333659		-1.53128
AC022431.1	1.53103	0.000815867		-1.53103
RGS22	1.53077	0.0276072		-1.53077
SNCG	1.5278	0.0274745		-1.5278
RN7SKP97	1.52765	0.0439931		-1.52765
PRPH2	1.52687	0.00721079		-1.52687
RP3-486I3.4	1.52658	0.0122779		-1.52658
COX7A1	1.52647	0.0139793		-1.52647
RP11-443F16.1	1.52573	0.00710325		-1.52573
RUNDC3B	1.52429	0.00492518		-1.52429
RP11-333E13.2	1.52411	0.00961805		-1.52411
CLDN11	1.52287	0.00520631		-1.52287
VN1R82P	1.52156	0.00079122		-1.52156
C6orf52	1.52042	0.0037714		-1.52042
RP11-295M18.2	1.51905	0.0368399		-1.51905
RNY4P3	1.51724	0.0192793		-1.51724
PABPC1P1	1.51685	0.0386757		-1.51685
AC018755.16	1.51675	0.0348919		-1.51675
RP11-20O24.4	1.51672	0.00286648		-1.51672
RP11-151D14.1	1.51626	0.0112522		-1.51626
LGI4	1.5156	0.00331128		-1.5156
CSNK1A1P3	1.51498	0.0129759		-1.51498
RPL37P23	1.51479	0.00522721		-1.51479
AC138655.1	1.5117	0.0218661		-1.5117
RPL7AP26	1.50993	0.0377853		-1.50993
RP11-378J18.8	1.50602	0.0115144		-1.50602
TRPC4	1.50329	0.00360402		-1.50329
RN7SKP87	1.49657	0.0458275		-1.49657
FKBP7	1.49643	0.000194872		-1.49643
F8	1.49611	0.00124707		-1.49611
RP11-354E23.5	1.49578	0.047909		-1.49578
GNG11	1.49537	0.013085		-1.49537
SPARCL1	1.49501	0.0010844		-1.49501
RP11-549L6.2	1.49323	0.0149436		-1.49323
ALG3P1	1.49288	0.0309895		-1.49288
RP11-342K6.2	1.4926	0.00602247		-1.4926
LAMP5	1.4906	0.00382821		-1.4906
CALCRL	1.4901	0.00143551		-1.4901
AOX1	1.48798	0.0189146		-1.48798
PROS1	1.48696	0.00263492		-1.48696
RP11-46H11.3	1.48669	0.00664563		-1.48669
ELOVL4	1.48571	0.023646		-1.48571
HOXC5	1.48521	0.0454532		-1.48521
KB-1958F4.1	1.48511	0.0193357		-1.48511
TIMP1	1.48393	1.42063e-05		-1.48393
MT-ATP6	1.48267	0.000546117		-1.48267
MTND4P12	1.4815	0.00434466		-1.4815
AP000473.8	1.47891	0.0159118		-1.47891
CCDC36	1.4765	0.0344133		-1.4765
RP11-362K14.7	1.47608	0.0268542		-1.47608
SAMD5	1.47122	0.0496891		-1.47122
SLC9B1	1.46421	0.00782195		-1.46421
ANKRD26P4	1.46253	0.0388908		-1.46253
MIR3139	1.4617	0.0421325		-1.4617
MTND2P2	1.46042	0.0470052		-1.46042
RP1-283K11.2	1.45967	0.0100948		-1.45967
PKD1P1	1.45839	0.00582008		-1.45839
IL33	1.45769	0.01851		-1.45769
FXYD6	1.45544	0.00832733		-1.45544
RP11-666A8.7	1.45396	0.0425105		-1.45396
RPL7AP11	1.45389	0.0274813		-1.45389
VN1R81P	1.45381	0.00750457		-1.45381
RP11-225B17.2	1.45311	0.00876146		-1.45311
RNU7-57P	1.4527	0.0272412		-1.4527
RPL36AP13	1.45187	0.0192266		-1.45187
RPEL1	1.44987	0.0427671		-1.44987
RPS4XP14	1.44931	0.00965956		-1.44931
RP11-51L5.2	1.44745	0.0492243		-1.44745
RP11-110H1.4	1.44504	0.0239036		-1.44504
LINC01059	1.44456	0.000546091		-1.44456
IMPG2	1.44417	0.0107969		-1.44417
CCL14	1.44305	0.0319045		-1.44305
RP11-91J19.4	1.44238	0.01041		-1.44238
RP11-332P22.2	1.44188	0.0399102		-1.44188
CTC-575D19.1	1.44134	0.000764921		-1.44134
RP11-479O17.10	1.43745	0.0189415		-1.43745
RP11-436H11.5	1.43301	0.0174355		-1.43301
TSPAN5	1.43157	0.00240872		-1.43157
RP11-39K24.14	1.43045	0.0480366		-1.43045
SNX29P2	1.43009	0.00754381		-1.43009
BHMT2	1.42963	0.00209961		-1.42963
RP11-100N21.1	1.42866	0.0290767		-1.42866
ST3GAL4	1.4286	0.00317985		-1.4286
RP11-203F10.6	1.42768	0.0468472		-1.42768
GPRASP2	1.42723	0.00329232		-1.42723
RP11-283I3.6	1.42677	0.000386429		-1.42677
RP11-806O11.1	1.42616	0.0260699		-1.42616
RP1-7G5.5	1.42503	0.0311984		-1.42503
RP5-1136G13.2	1.42219	0.00299639		-1.42219
FAM19A5	1.41956	0.0136958		-1.41956
RP11-888D10.4	1.41715	0.0294791		-1.41715
RP11-477G18.2	1.41303	0.0415788		-1.41303
MIR2909	1.41153	0.0492938		-1.41153
RP11-950C14.7	1.41091	0.0352624		-1.41091
MIR145	1.40973	0.0194964		-1.40973
MEF2C-AS1	1.40899	0.0156071		-1.40899
RP11-112J1.1	1.40874	0.000585606		-1.40874
RP11-5C23.1	1.40872	0.00813526		-1.40872
RP4-575N6.4	1.40621	0.0385993		-1.40621
LYVE1	1.40526	0.0130726		-1.40526
CTD-2349P21.10	1.40477	0.0463716		-1.40477
RP11-541N10.3	1.40359	0.00538232		-1.40359
CTD-3193K9.3	1.40224	0.0241589		-1.40224
ATP5J2-PTCD1	1.40207	0.00728983		-1.40207
RP11-68L18.1	1.3982	0.0294884		-1.3982
CTB-92J24.2	1.39626	0.0168927		-1.39626
RP5-991G20.2	1.39414	0.0210685		-1.39414
TMED7	1.39368	0.000134978		-1.39368
TMED6	1.393	0.021037		-1.393
RP11-160O5.1	1.39151	0.0279987		-1.39151
SNRPEP4	1.38972	0.0289035		-1.38972
IGFBP5	1.38904	0.00692013		-1.38904
MICD	1.38847	0.0436777		-1.38847
LAMA2	1.3882	0.0106632		-1.3882
ANK2	1.38769	0.00403306		-1.38769
RN7SL529P	1.38701	0.0187624		-1.38701
RP11-218F10.3	1.38674	0.00989956		-1.38674
AC009093.1	1.38617	0.0465679		-1.38617
RHEBP2	1.38589	0.0148981		-1.38589
SERP2	1.38463	0.00157535		-1.38463
RAD21-AS1	1.38348	0.03579		-1.38348
RP11-96D1.9	1.38034	0.012193		-1.38034
HCG11	1.38006	0.00309982		-1.38006
RP3-466I7.1	1.37696	0.00788759		-1.37696
AP001468.1	1.37687	0.0132046		-1.37687
BMX	1.37624	0.0133542		-1.37624
DOC2A	1.37416	0.0428277		-1.37416
RNU6-1138P	1.37253	0.00390135		-1.37253
RP11-285J16.1	1.37065	0.016812		-1.37065
PRKAR2B	1.37031	0.0140593		-1.37031
RN7SKP151	1.36908	0.0201346		-1.36908
FHL2	1.36881	0.00680191		-1.36881
RP11-175B9.3	1.36774	0.0129811		-1.36774
RP11-231L11.3	1.36489	0.0031426		-1.36489
RP11-90L20.2	1.36454	0.0249081		-1.36454
RNY4P4	1.36451	0.00434326		-1.36451
RPL7AP30	1.36177	0.00105861		-1.36177
AC024257.1	1.36171	0.00506684		-1.36171
RNU6-249P	1.36068	0.0363924		-1.36068
RP11-434P11.2	1.36016	0.00578144		-1.36016
RP11-844P9.2	1.35938	0.0473162		-1.35938
AL592310.1	1.35823	0.0144022		-1.35823
PID1	1.35605	0.0186842		-1.35605
RP11-226L15.5	1.35586	0.0131894		-1.35586
TUBA8	1.35568	0.00778504		-1.35568
UQCRBP1	1.3547	0.0416283		-1.3547
SNURF	1.35467	0.0403696		-1.35467
NPM1P14	1.35282	0.030622		-1.35282
RP11-316E14.6	1.35159	0.0126584		-1.35159
CAV2	1.35074	0.00712781		-1.35074
COX7C	1.34685	0.000324822		-1.34685
ALDH1A1	1.34649	0.00933061		-1.34649
RCAN2	1.34623	0.000213299		-1.34623
SNORD108	1.34383	0.0420373		-1.34383
AC019097.7	1.34086	0.000251368		-1.34086
INHA	1.34001	0.0351594		-1.34001
MT-TR	1.33977	0.0223859		-1.33977
RNU6-968P	1.33897	0.0329024		-1.33897
CHL1	1.33399	0.0318632		-1.33399
SMOC2	1.33374	0.0106748		-1.33374
RP5-1042I8.7	1.33335	0.0247414		-1.33335
ABI3BP	1.3324	0.0448983		-1.3324
AC131025.8	1.33184	0.0261065		-1.33184
MT-CO3	1.3318	0.000826146		-1.3318
CTD-2651B20.1	1.3314	0.0103634		-1.3314
CTC-428G20.3	1.32992	0.0004061		-1.32992
APOD	1.32981	0.0134692		-1.32981
RP11-428J1.5	1.32709	0.0122399		-1.32709
MT-ND4	1.32698	0.00365856		-1.32698
CTD-3093M3.1	1.31985	0.0220565		-1.31985
RP11-6N17.6	1.31976	0.0386027		-1.31976
RNU6-1283P	1.31833	0.00959204		-1.31833
RP11-403E24.1	1.31741	0.0134425		-1.31741
MIR1205	1.31647	0.0499951		-1.31647
RPS3AP47	1.31371	0.042455		-1.31371
RNY3	1.31236	0.000538726		-1.31236
RP11-16B13.1	1.31138	0.0144674		-1.31138
RPL15P3	1.30853	0.0469691		-1.30853
ZCCHC18	1.30726	0.0230418		-1.30726
LDB3	1.30667	0.0173309		-1.30667
RP11-734J24.1	1.3065	0.0293103		-1.3065
UBQLN3	1.30623	0.0152737		-1.30623
Z98881.1	1.30504	0.032084		-1.30504
RP11-312J18.5	1.3031	0.00721953		-1.3031
RP11-715F3.2	1.30208	0.000356721		-1.30208
RP11-160A9.3	1.30049	0.0379772		-1.30049
MBLAC2	1.30042	0.00600056		-1.30042
WDFY3-AS2	1.30006	0.00184785		-1.30006
NDUFAF4P1	1.3	0.0312629		-1.3
PPT2	1.29886	0.00580308		-1.29886
CTD-2287O16.1	1.29704	0.0133837		-1.29704
RP11-466H18.1	1.29697	0.00130149		-1.29697
RP11-351M8.1	1.29473	0.0175989		-1.29473
RP11-384C4.3	1.29233	0.000479374		-1.29233
TMEM47	1.29223	0.00296971		-1.29223
CMYA5	1.29199	0.0486946		-1.29199
RPS7P10	1.29183	0.023482		-1.29183
IL17D	1.29044	0.00232293		-1.29044
RN7SL16P	1.28861	0.000906026		-1.28861
AL353763.1	1.28823	0.0186912		-1.28823
AC098820.3	1.28744	0.047296		-1.28744
RNU6-834P	1.28471	0.0282729		-1.28471
STARD13-IT1	1.28395	0.0149804		-1.28395
RP1-266L20.9	1.2832	0.0265397		-1.2832
AC007557.3	1.28246	0.0393867		-1.28246
NLGN4X	1.28216	0.0285687		-1.28216
CTC-510F12.2	1.2804	0.00352512		-1.2804
RP4-802A10.1	1.27985	0.0152813		-1.27985
CHST7	1.27879	0.0361103		-1.27879
SERHL2	1.27764	0.0225892		-1.27764
EGFL8	1.27723	0.000197077		-1.27723
RP5-1000K24.2	1.27699	0.010543		-1.27699
ITGB3	1.27555	0.0373701		-1.27555
RP11-774O3.3	1.27373	0.00968007		-1.27373
RP11-305K5.1	1.27291	0.0342618		-1.27291
AGPAT9	1.27185	0.0389887		-1.27185
RP11-553L6.5	1.27103	0.000104318		-1.27103
RP11-13N13.2	1.26761	0.0449249		-1.26761
CTD-2286N8.2	1.26682	0.048444		-1.26682
HFM1	1.26619	0.0153898		-1.26619
MTATP6P1	1.26613	0.00224736		-1.26613
ITM2B	1.26606	0.00112132		-1.26606
SYT15	1.26421	0.00828417		-1.26421
RNU6-786P	1.26414	0.0230584		-1.26414
KIAA1586	1.26358	0.000119649		-1.26358
RP11-523G9.3	1.26129	0.0383492		-1.26129
CTB-131B5.2	1.26067	0.00177156		-1.26067
RP11-498D10.6	1.25965	0.00551196		-1.25965
MT-ND3	1.25925	0.0100364		-1.25925
MROH7	1.25654	0.000721349		-1.25654
RP11-290D2.3	1.25595	0.00171302		-1.25595
RP11-632C17__A.1	1.25458	0.0202227		-1.25458
HSPE1P26	1.25438	0.0430341		-1.25438
SYNGR1	1.25437	0.0316161		-1.25437
THBS4	1.25143	0.00332696		-1.25143
RP11-196G11.4	1.25115	0.0440561		-1.25115
CAV1	1.25096	0.0116413		-1.25096
ZNF33BP1	1.25047	0.0335792		-1.25047
NTRK2	1.24765	0.0414798		-1.24765
RP11-16F15.1	1.24747	0.0145086		-1.24747
RP6-201G10.2	1.24589	0.0494862		-1.24589
COL14A1	1.24474	0.0226904		-1.24474
TGFBR3	1.24447	0.0120955		-1.24447
RP11-761N21.2	1.24308	0.00690635		-1.24308
RP11-48G14.2	1.24245	0.0352473		-1.24245
F8A1	1.24121	0.00766596		-1.24121
MTND4P14	1.24121	0.0187188		-1.24121
CHMP1B2P	1.23898	0.0228603		-1.23898
RP11-383B4.4	1.23859	0.00675617		-1.23859
RPL5P12	1.2365	0.0160738		-1.2365
RN7SL788P	1.23544	0.0214278		-1.23544
ZSWIM5	1.23325	0.0415529		-1.23325
RPL26P30	1.22863	0.0416794		-1.22863
RP13-487P22.1	1.22474	0.00224948		-1.22474
AL139099.1	1.22453	0.0319499		-1.22453
RFK	1.22405	0.000916725		-1.22405
AC012363.4	1.22338	0.00652536		-1.22338
GNG12	1.22161	0.00118535		-1.22161
HIF1AP1	1.22081	0.0108661		-1.22081
AC132192.1	1.22072	0.0108031		-1.22072
NAP1L4P3	1.22042	0.0316621		-1.22042
RP3-510L9.1	1.21987	0.016163		-1.21987
MIR143HG	1.2193	0.0289225		-1.2193
RP11-61L19.1	1.21927	0.00295234		-1.21927
CTC-462L7.1	1.21923	0.0145699		-1.21923
BDNF	1.21879	0.0285518		-1.21879
CTH	1.21861	0.00933481		-1.21861
RNU6-681P	1.2163	0.0394299		-1.2163
MLTK	1.21582	0.00285455		-1.21582
CTD-2002H8.2	1.2157	0.0200569		-1.2157
RP11-452K12.3	1.21138	0.043492		-1.21138
RNU6-828P	1.21129	0.00671198		-1.21129
RP11-686D22.4	1.21047	0.020902		-1.21047
RP4-614O4.12	1.2091	0.0308062		-1.2091
CYSTM1	1.20676	0.000673107		-1.20676
RP11-165H4.2	1.20631	0.0281754		-1.20631
KB-1562D12.1	1.20553	0.0364878		-1.20553
AC117395.1	1.20543	0.029842		-1.20543
BBS10	1.20455	0.0046231		-1.20455
RP1-145M24.1	1.20388	0.0254374		-1.20388
RPL39	1.20351	0.0022909		-1.20351
RP11-6N17.4	1.20321	0.0128131		-1.20321
PTCH2	1.20172	0.0251341		-1.20172
AP001429.1	1.2016	0.0024418		-1.2016
H3F3AP4	1.1972	0.0111963		-1.1972
RP11-48G14.1	1.19641	0.0159366		-1.19641
RP11-388M20.1	1.19543	0.0124261		-1.19543
DNAJC12	1.19235	0.0295319		-1.19235
RP4-539M6.20	1.19167	0.0135332		-1.19167
RP11-727A23.11	1.18932	0.029099		-1.18932
TCEAL1	1.18815	0.00192784		-1.18815
LINC00312	1.18768	0.013643		-1.18768
DKK3	1.18742	0.0014177		-1.18742
RPL36AP33	1.18699	0.0303376		-1.18699
LHFP	1.18685	0.00943221		-1.18685
VTRNA2-1	1.18603	0.0128069		-1.18603
SEC61G	1.18549	0.00303325		-1.18549
RP11-76N22.2	1.18293	0.00501783		-1.18293
SDC2	1.18214	0.0158668		-1.18214
RP11-820K3.2	1.18126	0.0222896		-1.18126
RP11-24C3.2	1.18066	0.00725423		-1.18066
YWHAZP3	1.18023	0.0137132		-1.18023
SUGT1P3	1.17893	0.00803661		-1.17893
MGP	1.17738	0.0463069		-1.17738
PEG10	1.17632	0.0313383		-1.17632
PYGO1	1.17619	0.0427146		-1.17619
CTC-366B18.4	1.16965	0.0148036		-1.16965
RP11-370I10.6	1.1686	0.0082527		-1.1686
FAM66B	1.16831	0.0249742		-1.16831
C10orf32	1.16809	0.0403224		-1.16809
SGCD	1.16794	0.0373554		-1.16794
FAM229B	1.1667	0.00464197		-1.1667
JAM2	1.16407	0.0135497		-1.16407
TRAM2-AS1	1.16357	0.00156771		-1.16357
FAM175A	1.16234	0.00351175		-1.16234
RP1-40E16.12	1.16033	0.0200411		-1.16033
PACRG	1.15956	0.00225422		-1.15956
RNU6-534P	1.15841	0.0282215		-1.15841
RP11-760H22.2	1.15752	0.0370782		-1.15752
SLC27A6	1.15641	0.0412784		-1.15641
RP4-714D9.5	1.15629	0.0184865		-1.15629
CTD-2006H14.2	1.15422	0.0356958		-1.15422
RP11-77K12.3	1.15097	0.0474946		-1.15097
ACSM3	1.15063	0.0305076		-1.15063
RP11-484D2.4	1.14957	0.0431042		-1.14957
WASF3	1.14863	0.0292516		-1.14863
MT-ND2	1.14851	0.0077964		-1.14851
RP11-597D13.9	1.14747	0.0265887		-1.14747
KL	1.14719	0.0404916		-1.14719
RPL6P27	1.14678	0.00205048		-1.14678
RP11-5C23.2	1.14583	0.0112598		-1.14583
RPL5P24	1.14557	0.0393739		-1.14557
SSPN	1.14367	0.00533712		-1.14367
MTCYBP3	1.14356	0.0151522		-1.14356
RP11-147L13.8	1.14332	0.00953193		-1.14332
ZDHHC2	1.1416	0.0163898		-1.1416
RP11-887P2.6	1.14126	0.0360613		-1.14126
RPL18AP3	1.14117	0.0320707		-1.14117
PELI2	1.14025	0.0167871		-1.14025
PTHLH	1.14013	0.0481621		-1.14013
RP11-423O2.5	1.13913	0.0476514		-1.13913
RPL15P2	1.13896	0.0375217		-1.13896
SLC16A9	1.13783	0.0194805		-1.13783
AC105020.1	1.13624	0.0449557		-1.13624
HSPA8P3	1.13613	0.0226969		-1.13613
AC139452.2	1.13543	0.000933938		-1.13543
TOPORS-AS1	1.13434	0.044009		-1.13434
RP11-83J16.1	1.13419	0.0295929		-1.13419
RP11-197M22.2	1.13245	0.000255255		-1.13245
ALDH6A1	1.13221	0.0051519		-1.13221
RP11-181C21.4	1.13157	0.00910768		-1.13157
HOXD9	1.13021	0.0477692		-1.13021
RPL5P34	1.12949	0.000141377		-1.12949
NACAP1	1.12883	0.00787148		-1.12883
AC074367.1	1.12725	0.00368547		-1.12725
RN7SL44P	1.12581	0.0451695		-1.12581
RNF180	1.12426	0.0327945		-1.12426
MT-CYB	1.12401	0.00659546		-1.12401
RP11-250B2.6	1.12398	0.0306204		-1.12398
AC005789.11	1.12328	0.00535452		-1.12328
RNU6-593P	1.12327	0.0249284		-1.12327
CTD-2313J17.1	1.11914	0.0266055		-1.11914
AC078899.3	1.11886	0.0382121		-1.11886
RBP7	1.11739	0.0468298		-1.11739
TM4SF18	1.11487	0.0136822		-1.11487
EID1	1.11354	0.000215237		-1.11354
RP11-39K24.4	1.1109	0.046312		-1.1109
RPL10P3	1.11066	0.0239689		-1.11066
WFDC1	1.10757	0.0420617		-1.10757
TAF9B	1.1073	0.00256506		-1.1073
GCSHP5	1.10723	0.00369308		-1.10723
RPS4X	1.10571	0.000315423		-1.10571
CCDC169	1.10516	0.045927		-1.10516
RP11-252K23.1	1.10465	0.00421479		-1.10465
VMA21	1.10403	0.0069395		-1.10403
FHL1	1.10042	0.0339203		-1.10042
RP11-517H2.6	1.09999	0.00935044		-1.09999
RNU6-107P	1.09867	0.0400417		-1.09867
FAM210B	1.09861	0.0136253		-1.09861
NUDT7	1.09801	0.0171325		-1.09801
RPS18P12	1.0974	0.00373652		-1.0974
RP4-680D5.2	1.09726	0.011917		-1.09726
HOXD8	1.09663	0.0468255		-1.09663
NR2F1-AS1	1.09636	0.0193297		-1.09636
JAM3	1.09379	0.011906		-1.09379
CTB-36H16.2	1.0923	0.0190224		-1.0923
PRTFDC1	1.09125	0.0196646		-1.09125
USMG5	1.09112	0.0141762		-1.09112
SFR1	1.09025	0.0313041		-1.09025
RPL36AP43	1.09014	0.0260138		-1.09014
GNA14	1.08976	0.0270227		-1.08976
SCML2P2	1.08972	0.0473539		-1.08972
RPS15A	1.08938	0.00102133		-1.08938
C11orf70	1.08769	0.0109565		-1.08769
RPS3AP6	1.08551	0.0025177		-1.08551
CPXM2	1.08452	0.0419168		-1.08452
MIR644A	1.08362	0.029405		-1.08362
C9orf147	1.08328	0.0227931		-1.08328
CDC42P6	1.08294	0.0313727		-1.08294
TRIM6	1.07936	0.0421377		-1.07936
RNU6-123P	1.07909	0.00848273		-1.07909
RPL5P30	1.07853	0.00801676		-1.07853
MIR553	1.0783	0.0391853		-1.0783
PCGF5	1.07566	0.000658611		-1.07566
ANKRD29	1.07557	0.029802		-1.07557
COMMD6	1.07459	0.0039922		-1.07459
FABP3	1.07431	0.0458041		-1.07431
GPX3	1.07374	0.0191556		-1.07374
TVP23BP2	1.07325	0.0432629		-1.07325
RPL12P4	1.07284	0.00173507		-1.07284
RP11-539L10.3	1.07266	0.0406287		-1.07266
AC007386.3	1.07124	0.0111765		-1.07124
MYRIP	1.06966	0.0399312		-1.06966
TMED10P1	1.06912	0.0328931		-1.06912
PPIAP11	1.06535	0.0420514		-1.06535
CAB39L	1.06313	0.0113953		-1.06313
HOPX	1.06289	0.0286314		-1.06289
RP11-304F15.3	1.06123	0.00959148		-1.06123
NID1	1.06074	0.0191255		-1.06074
GDI2P2	1.06017	0.0225302		-1.06017
LINC00515	1.06003	0.0464397		-1.06003
MRO	1.05988	0.0383867		-1.05988
RP11-519C12.1	1.05979	0.022092		-1.05979
RP11-56M3.1	1.0587	0.027814		-1.0587
RPL21P120	1.05797	0.0449935		-1.05797
RP11-162G10.5	1.05787	0.0110593		-1.05787
RPL5P18	1.0577	0.0493542		-1.0577
RP11-531F16.4	1.05764	0.00860019		-1.05764
RP11-390E23.6	1.05671	0.0185947		-1.05671
CCR10	1.05466	0.0231907		-1.05466
RN7SKP78	1.05459	0.000504356		-1.05459
RP11-95D17.1	1.05427	0.0171571		-1.05427
B3GNT1	1.05323	0.0208236		-1.05323
RP11-379F4.8	1.05154	0.0251316		-1.05154
SEPP1	1.05143	0.0344334		-1.05143
MMGT1	1.05107	0.00429574		-1.05107
PTGER2	1.05009	0.0190833		-1.05009
NCR3LG1	1.04955	0.0195203		-1.04955
CTD-2026D20.2	1.04939	0.00429026		-1.04939
CTD-2528L19.6	1.04931	0.00666831		-1.04931
AF129075.5	1.04926	0.0429712		-1.04926
COA6	1.0488	0.00806173		-1.0488
POLR2K	1.04683	0.0010189		-1.04683
MIR497HG	1.04659	0.0314284		-1.04659
ERVMER34-1	1.04601	0.022818		-1.04601
SYPL1	1.04534	0.00682869		-1.04534
MT-TH	1.04523	0.0157818		-1.04523
RP11-5L12.1	1.0447	0.0482673		-1.0447
CTD-2192J16.15	1.04376	0.0207358		-1.04376
HCG23	1.04208	0.0437178		-1.04208
MIR1207	1.04041	0.0139315		-1.04041
RPL34P18	1.03854	0.00330505		-1.03854
KTN1-AS1	1.03826	0.00232489		-1.03826
AC005154.8	1.03465	0.0315693		-1.03465
AC096772.6	1.03421	0.0289675		-1.03421
RFTN2	1.03342	0.00411464		-1.03342
FMOD	1.03334	0.00931923		-1.03334
RP5-967N21.7	1.03333	0.0425932		-1.03333
KLF15	1.03073	0.0425579		-1.03073
NDUFAF4	1.03002	0.00920538		-1.03002
LAPTM4A	1.03001	0.000834345		-1.03001
MORN4	1.02985	0.0237365		-1.02985
TMEM106B	1.02924	0.000357221		-1.02924
RPS2P46	1.02824	0.00908561		-1.02824
HSDL2	1.02724	0.0022269		-1.02724
RP1-151F17.2	1.02632	0.0296507		-1.02632
RPL14P1	1.0259	0.00940927		-1.0259
SPATA12	1.02484	0.0468889		-1.02484
RP1-128O3.6	1.02199	0.0492082		-1.02199
MANSC1	1.02158	0.0118539		-1.02158
RPL5	1.02064	9.97779e-05		-1.02064
RP11-124N14.3	1.02059	0.0294883		-1.02059
RP11-613F22.6	1.02032	0.0436816		-1.02032
CITF22-92A6.1	1.01861	0.0354099		-1.01861
RNU6-431P	1.01748	0.034099		-1.01748
ARL10	1.01723	0.00760198		-1.01723
BAG2	1.01698	0.00289853		-1.01698
TPT1	1.01444	0.000362426		-1.01444
IER3IP1	1.01414	0.00183454		-1.01414
CTA-293F17.1	1.01408	0.0388576		-1.01408
RP1-278E11.3	1.01391	0.0278807		-1.01391
RPL9P8	1.01357	0.016637		-1.01357
ZNF704	1.01334	0.0443629		-1.01334
RPL4P4	1.01281	0.00264308		-1.01281
RP11-197P3.5	1.0123	0.0287264		-1.0123
RAB40A	1.01225	0.0143929		-1.01225
RPS17	1.01184	0.00568737		-1.01184
RBMS3	1.01174	0.0156104		-1.01174
CTD-2555K7.2	1.0106	0.0203808		-1.0106
LIX1L	1.01047	0.00263803		-1.01047
C6orf120	1.00911	0.000307819		-1.00911
MANEA	1.00868	0.00336131		-1.00868
RP11-156E6.1	1.00752	0.00934183		-1.00752
ESD	1.0066	0.000629588		-1.0066
AC010329.1	1.00607	0.0124622		-1.00607
CHST3	1.00572	0.029648		-1.00572
ZNF275	1.00458	0.00299417		-1.00458
NKAPP1	1.00356	0.00327749		-1.00356
DKFZP667F0711	1.00343	0.00893764		-1.00343
RGS5	1.00301	0.0190137		-1.00301
IFITM2	1.00289	0.015079		-1.00289
RP11-274J7.2	1.00259	0.0460317		-1.00259
CTC-365E16.1	1.00179	0.0133402		-1.00179
FAM8A1	1.00085	0.00210808		-1.00085
TCIRG1	-1.00273	0.00287287		1.00273
PDE4B	-1.00297	0.00915705		1.00297
ST8SIA1	-1.00385	0.000504411		1.00385
LAMB4	-1.00543	0.0272424		1.00543
FAM73B	-1.00573	0.0264015		1.00573
CTSK	-1.00723	0.0179481		1.00723
PARP1P1	-1.00902	0.0219518		1.00902
PTPN7	-1.00994	0.0356674		1.00994
IDUA	-1.01117	0.0117617		1.01117
IL22RA1	-1.01561	0.0281543		1.01561
NAP1L4P1	-1.01615	0.00389983		1.01615
AL031005.1	-1.01659	0.0276565		1.01659
SH2B2	-1.01678	0.0306275		1.01678
OSCAR	-1.01734	0.000457012		1.01734
NBEAL2	-1.01763	0.000937548		1.01763
TNFRSF4	-1.01843	0.0254106		1.01843
KIF18B	-1.02127	0.00878631		1.02127
TELO2	-1.02183	0.00234051		1.02183
DOCK8	-1.02219	0.0132135		1.02219
RTEL1-TNFRSF6B	-1.02284	0.00122037		1.02284
ROR2	-1.02369	0.031581		1.02369
AC018766.5	-1.02369	0.0068994		1.02369
RP13-996F3.3	-1.02545	0.04796		1.02545
EPPK1	-1.02625	0.00387075		1.02625
CTD-3232M19.2	-1.02649	0.0124228		1.02649
FANCA	-1.02712	0.00715093		1.02712
RNU6-1329P	-1.02819	0.0357972		1.02819
ST18	-1.02877	0.0441576		1.02877
SNORA55	-1.03007	0.0315179		1.03007
LINC00968	-1.0312	0.0405243		1.0312
PARVG	-1.03211	0.0030219		1.03211
TRPV6	-1.03304	0.031359		1.03304
CDK5R1	-1.03389	0.00822061		1.03389
PIDD	-1.03456	0.000332615		1.03456
SH3TC1	-1.0363	0.000772522		1.0363
SLC16A3	-1.03833	0.018018		1.03833
LILRB1	-1.04234	0.000795716		1.04234
CCDC141	-1.04243	0.0430813		1.04243
DPEP2	-1.04334	0.0229192		1.04334
ADAMTS2	-1.0437	0.00789678		1.0437
HIP1R	-1.04433	0.00297183		1.04433
MORN3	-1.04445	0.0108553		1.04445
RP11-432J24.2	-1.04506	0.0170949		1.04506
CMAHP	-1.04601	0.00711706		1.04601
MST1	-1.04897	0.0031856		1.04897
SARDH	-1.05068	0.0152157		1.05068
KCP	-1.05083	0.0450611		1.05083
NCKAP1L	-1.05107	0.00789338		1.05107
CLEC12A	-1.05125	0.0335326		1.05125
CCDC102B	-1.0525	0.00242326		1.0525
EME2	-1.0528	4.96e-06		1.0528
DAB1	-1.05339	0.0460474		1.05339
TONSL	-1.05425	0.00258097		1.05425
ZFHX4	-1.05699	0.03902		1.05699
KLHL17	-1.05783	0.0243012		1.05783
IL16	-1.0593	0.00307456		1.0593
TMEM2	-1.06203	0.0158235		1.06203
RP11-76E16.2	-1.0623	0.0341791		1.0623
MYO1F	-1.06531	0.0014192		1.06531
RN7SL732P	-1.06649	0.0111012		1.06649
PARP10	-1.06754	0.0187757		1.06754
OLFML2B	-1.06781	0.0313251		1.06781
APOL1	-1.06804	0.0177789		1.06804
RP11-32D17.4	-1.06851	0.0370287		1.06851
TRAF2	-1.06979	0.00648453		1.06979
RHPN1	-1.06996	0.00236663		1.06996
AMZ1	-1.07324	0.0255353		1.07324
NR1I2	-1.07347	0.0391877		1.07347
PKMP5	-1.07475	0.000956993		1.07475
CORO1A	-1.07485	0.0393648		1.07485
ITGA10	-1.07549	0.0005297		1.07549
NDOR1	-1.07609	0.0242395		1.07609
TMEM150B	-1.07663	0.00949906		1.07663
ADAMTS13	-1.07923	0.00288864		1.07923
TYMP	-1.07938	0.0323361		1.07938
COL8A2	-1.0797	0.0211901		1.0797
AZI1	-1.08018	0.00225604		1.08018
DBH-AS1	-1.08101	0.0283233		1.08101
PLA2G4C	-1.08225	0.000242444		1.08225
COL9A2	-1.08327	0.0152668		1.08327
RP11-667M19.9	-1.08333	0.0380782		1.08333
CASP1P2	-1.08345	0.0362883		1.08345
RCAN1	-1.08659	0.008032		1.08659
LRRC45	-1.0902	0.000959756		1.0902
ARHGAP15	-1.09144	0.0121563		1.09144
RN7SL47P	-1.09292	0.00621834		1.09292
EFCAB4A	-1.09296	0.0356055		1.09296
RN7SL664P	-1.09324	0.0369784		1.09324
RP11-263C24.1	-1.09358	0.0087465		1.09358
KRT8P48	-1.09424	0.0465771		1.09424
ANPEP	-1.09761	0.00565856		1.09761
PGAM1P7	-1.0979	0.0202011		1.0979
RP5-1086K13.1	-1.09791	0.0107541		1.09791
KLHL6	-1.09957	0.0262975		1.09957
RP3-370M22.8	-1.10044	0.0123446		1.10044
ZCCHC3	-1.10063	0.0336314		1.10063
TUBB3	-1.10103	0.0141941		1.10103
MEGF6	-1.10189	0.0160791		1.10189
UBE2HP1	-1.10451	0.0418839		1.10451
NFAM1	-1.10544	0.0155619		1.10544
RNU6-34P	-1.10701	0.00591477		1.10701
SYTL1	-1.108	0.00508864		1.108
RP11-57A19.2	-1.10887	0.0184534		1.10887
PKP3	-1.11087	0.0241604		1.11087
TAGAP	-1.11285	0.0160393		1.11285
PTPRCAP	-1.11471	0.042523		1.11471
AC144521.1	-1.11684	0.0329566		1.11684
CD1D	-1.1182	0.00549148		1.1182
HSPA7	-1.1188	0.00583038		1.1188
SETSIP	-1.11919	0.0129828		1.11919
RN7SL206P	-1.1193	0.0110928		1.1193
APOBR	-1.11983	0.0111066		1.11983
ADAMTS12	-1.12133	0.00706474		1.12133
SNORD124	-1.1216	0.0251792		1.1216
COL3A1	-1.12167	0.0143014		1.12167
ADAM8	-1.12218	0.0160151		1.12218
ASIC1	-1.12761	0.0376045		1.12761
NCAM2	-1.13045	0.046605		1.13045
RIPK3	-1.1355	0.0256051		1.1355
IRF8	-1.13588	0.0130593		1.13588
AC012066.1	-1.13648	0.0225233		1.13648
CYTH4	-1.13694	0.00519623		1.13694
ALS2CL	-1.13761	0.0131657		1.13761
ASMTL-AS1	-1.13884	0.0140497		1.13884
CACNA1F	-1.13944	0.0379262		1.13944
C9orf139	-1.14018	0.0170856		1.14018
AC004447.2	-1.14097	0.043017		1.14097
RNU2-14P	-1.14155	0.00385937		1.14155
ANO9	-1.14277	0.00233078		1.14277
COL5A1	-1.14353	0.0132065		1.14353
RP11-112H10.6	-1.14438	0.029229		1.14438
SASH3	-1.14507	0.0163813		1.14507
ITGBL1	-1.14558	0.04709		1.14558
ODF3B	-1.14752	0.0128734		1.14752
CSF2RA	-1.14835	0.00488386		1.14835
IKBKE	-1.14946	0.00210207		1.14946
AC012314.8	-1.15035	0.0119008		1.15035
RP11-512M8.3	-1.15155	0.00589415		1.15155
SPTBN5	-1.15174	0.000146082		1.15174
RNU1-83P	-1.15391	0.00471858		1.15391
RNU2-29P	-1.15411	0.00382489		1.15411
RN7SL454P	-1.15422	0.0101185		1.15422
KCTD9P2	-1.15504	0.00480606		1.15504
FMNL1	-1.15567	0.00157161		1.15567
SNX22	-1.15888	0.029409		1.15888
SLCO5A1	-1.1591	0.00280887		1.1591
RN7SL721P	-1.1596	0.0168526		1.1596
ALOX5	-1.16081	0.00130308		1.16081
PIK3R6	-1.16096	0.000769415		1.16096
CTB-35F21.1	-1.16119	0.0166038		1.16119
HMGB1P19	-1.16265	0.022782		1.16265
STAT4	-1.16281	0.022764		1.16281
AC090673.1	-1.16311	0.0460357		1.16311
LIMD2	-1.16453	0.00800262		1.16453
UBE2QL1	-1.16611	0.0400305		1.16611
OLR1	-1.16861	0.0337034		1.16861
SLA2	-1.17148	0.0123335		1.17148
NLRC5	-1.17176	0.00419635		1.17176
ADAM12	-1.17406	0.0128406		1.17406
RNU2-20P	-1.17526	0.00685471		1.17526
MFAP5	-1.17714	0.0457611		1.17714
SIDT1	-1.1811	0.0026864		1.1811
AMPH	-1.18314	0.0417508		1.18314
ICOSLG	-1.18406	0.00332787		1.18406
VAV1	-1.18777	0.00518788		1.18777
POU2F2	-1.18922	0.00431522		1.18922
EPS8L1	-1.19114	0.0204769		1.19114
EPS8L2	-1.19294	0.0171082		1.19294
IL4R	-1.19404	0.00401798		1.19404
IL4I1	-1.1941	0.0380959		1.1941
DOK3	-1.19502	0.00174489		1.19502
AC009961.5	-1.19817	0.0412958		1.19817
CEACAM21	-1.2025	0.00983257		1.2025
SH2D3C	-1.20543	0.0211511		1.20543
SNORD3B-1	-1.20779	0.0484934		1.20779
PLEKHG7	-1.20804	0.0369621		1.20804
TRAF3IP3	-1.20952	0.0201182		1.20952
RP11-396B14.2	-1.21126	0.0235228		1.21126
AC020571.3	-1.2124	0.0287689		1.2124
RPL32P1	-1.21273	0.0258985		1.21273
DNM1	-1.21366	0.00568317		1.21366
NTM	-1.21874	0.0316618		1.21874
ERP29P1	-1.21891	0.00152111		1.21891
CCDC64	-1.22009	4.46316e-05		1.22009
MYO1G	-1.22044	0.0168721		1.22044
PIEZO1	-1.22399	0.0110223		1.22399
ITGAX	-1.22412	0.00154482		1.22412
C5AR2	-1.22753	0.00325431		1.22753
DTHD1	-1.22781	0.014035		1.22781
COL5A2	-1.22848	0.00874445		1.22848
EVPL	-1.22875	3.52152e-05		1.22875
RN7SL546P	-1.2305	0.0272141		1.2305
RUNX3	-1.23362	0.0310525		1.23362
PTK2B	-1.23634	0.000222075		1.23634
RP3-510D11.1	-1.23839	0.00473772		1.23839
FBLN2	-1.24274	0.0419553		1.24274
ABCB4	-1.24397	0.000246247		1.24397
U3	-1.24432	0.0374826		1.24432
TMC6	-1.24643	0.000924955		1.24643
EFCAB5	-1.24674	0.0222339		1.24674
P2RX5-TAX1BP3	-1.24948	0.0119486		1.24948
BHLHE22	-1.25361	0.00724036		1.25361
TRAJ12	-1.25816	0.0167805		1.25816
PRF1	-1.25938	0.0152811		1.25938
AC017035.2	-1.26015	0.000623902		1.26015
AC007278.3	-1.26243	0.0224887		1.26243
ATP2A3	-1.26335	0.0492764		1.26335
GALNT5	-1.26414	0.00539751		1.26414
KIF21B	-1.26754	0.000653199		1.26754
MMP9	-1.26756	0.0379965		1.26756
DENND1C	-1.2714	0.00203802		1.2714
AC018766.4	-1.27273	0.000335456		1.27273
RP11-750H9.5	-1.27324	0.00114449		1.27324
AC012368.1	-1.27618	0.0125394		1.27618
GNLY	-1.27687	0.030512		1.27687
RP11-936I5.1	-1.27873	0.0289268		1.27873
RNU1-16P	-1.27975	0.0442854		1.27975
KIAA1045	-1.28025	0.00747209		1.28025
TRPM2	-1.28034	0.000189511		1.28034
C1orf127	-1.28078	0.0479739		1.28078
WDFY4	-1.28382	0.00175389		1.28382
EOMES	-1.28641	0.0414975		1.28641
HLA-F	-1.28684	0.0038797		1.28684
KRT18P15	-1.28712	0.00449248		1.28712
AC144449.1	-1.28826	0.00976974		1.28826
GRAP2	-1.28845	0.0209646		1.28845
PLCB2	-1.28886	0.00281935		1.28886
DOCK2	-1.28979	0.00119952		1.28979
PLEKHN1	-1.28981	0.0111199		1.28981
FAM129C	-1.29021	0.0441302		1.29021
MOXD1	-1.29087	0.0304144		1.29087
HNRNPA1P24	-1.29193	0.0193309		1.29193
APOBEC3H	-1.29465	0.0267258		1.29465
IRF5	-1.29566	0.000990334		1.29566
C14orf182	-1.30649	0.000657315		1.30649
RNU2-36P	-1.30706	0.0417628		1.30706
MAP4K1	-1.30858	0.00244498		1.30858
F5	-1.30981	0.0429731		1.30981
RP5-854E16.2	-1.31118	0.0160285		1.31118
DERL3	-1.31419	0.0223002		1.31419
HES4	-1.32026	0.0491596		1.32026
RTEL1P1	-1.32614	2.20552e-05		1.32614
C15orf27	-1.32959	0.0167783		1.32959
MFI2	-1.33108	0.0143593		1.33108
ANK1	-1.33139	0.0405227		1.33139
DUSP27	-1.33222	0.0071997		1.33222
TTN	-1.33331	0.0095087		1.33331
NTRK1	-1.33423	0.0188588		1.33423
GIPR	-1.33643	0.0192068		1.33643
HK3	-1.33715	0.0113593		1.33715
ADTRP	-1.33752	0.00482183		1.33752
HLA-DQB2	-1.33758	0.0167223		1.33758
ADPGK-AS1	-1.3453	0.00260524		1.3453
SCML4	-1.34546	0.0275934		1.34546
SP140	-1.35063	0.0189644		1.35063
LTF	-1.35296	0.0412269		1.35296
P2RY8	-1.35392	0.0161957		1.35392
RNU1-20P	-1.3577	0.037148		1.3577
PTGIR	-1.36182	0.0358764		1.36182
HDGFL1	-1.36679	0.034021		1.36679
HMHA1	-1.36831	0.00141981		1.36831
EMR4P	-1.3697	0.013416		1.3697
SPHK1	-1.37013	0.0310623		1.37013
PSTPIP1	-1.37292	0.00303531		1.37292
CD300LF	-1.37737	0.00741587		1.37737
MIR663B	-1.37853	0.0134482		1.37853
KIAA1644	-1.37889	0.0354946		1.37889
SMCO2	-1.38167	0.00794912		1.38167
HSPA8P4	-1.38286	0.00740032		1.38286
CCDC78	-1.38317	0.0186108		1.38317
CHRNA1	-1.38806	0.0156139		1.38806
RP11-214O1.3	-1.38816	0.021385		1.38816
NLRP12	-1.38846	0.0104651		1.38846
RP5-1028K7.2	-1.38976	0.0169095		1.38976
INHBA	-1.39147	0.0435185		1.39147
RNU1-1	-1.4002	0.0261872		1.4002
LINC00635	-1.40234	0.0380062		1.40234
CARD9	-1.40312	0.00675472		1.40312
CD37	-1.40348	0.00588667		1.40348
NKG7	-1.40571	0.0435943		1.40571
LANCL3	-1.40862	0.0239436		1.40862
FAP	-1.40944	0.0379783		1.40944
PRSS36	-1.41667	0.00351152		1.41667
RPGRIP1	-1.41843	0.00398602		1.41843
NLRC3	-1.41979	0.0036		1.41979
ABCA7	-1.4205	0.00606717		1.4205
LINC00922	-1.42063	0.0268227		1.42063
COL5A3	-1.42082	0.00120986		1.42082
RP11-330M2.4	-1.42227	0.0100149		1.42227
CD27	-1.42432	0.0495546		1.42432
PITX2	-1.4274	0.0386998		1.4274
CD36	-1.42926	0.00763969		1.42926
CTD-2020K17.1	-1.43489	0.000249204		1.43489
GPR68	-1.43679	0.00967649		1.43679
ANP32C	-1.44341	0.00622703		1.44341
IFI30	-1.44678	0.00250127		1.44678
UAP1L1	-1.45396	0.00670204		1.45396
LINC00996	-1.45397	0.0148872		1.45397
ITGAL	-1.4544	0.0233273		1.4544
GPR132	-1.45451	0.00104544		1.45451
TNN	-1.45571	0.0187999		1.45571
SEMA3D	-1.45726	0.0365368		1.45726
GPR114	-1.4574	0.0161455		1.4574
C1orf61	-1.45781	0.00968515		1.45781
SLC22A14	-1.46146	0.011824		1.46146
ITGB2-AS1	-1.46802	0.0195166		1.46802
SDS	-1.4692	0.00338539		1.4692
AC109826.1	-1.47111	0.0170417		1.47111
PARP15	-1.47541	0.00767081		1.47541
PLAU	-1.47547	0.00397243		1.47547
RHOH	-1.47677	0.0156834		1.47677
CD6	-1.48111	0.0037273		1.48111
CALN1	-1.487	0.0483133		1.487
MIR142	-1.48985	0.0140129		1.48985
RP11-326G21.1	-1.49193	1.38e-06		1.49193
KIAA1549L	-1.4926	0.0304182		1.4926
RP11-58E21.3	-1.49472	0.0157614		1.49472
AGAP2	-1.49641	0.0021889		1.49641
FAM204BP	-1.4971	8.17699e-05		1.4971
TRPC3	-1.49732	0.00319521		1.49732
PDCD1	-1.49851	0.0391816		1.49851
LY9	-1.50118	0.0137378		1.50118
DCLK3	-1.50124	0.0105969		1.50124
KRT86	-1.50423	0.00491442		1.50423
HMGB2P1	-1.50428	0.00377412		1.50428
RP11-473M20.9	-1.51372	0.0049201		1.51372
P2RX5	-1.52721	0.00918609		1.52721
LINC01057	-1.52989	0.000983171		1.52989
KCNJ15	-1.5304	0.0236059		1.5304
CD247	-1.53175	0.0193301		1.53175
ANP32BP1	-1.53486	0.0479327		1.53486
PRKCB	-1.5355	0.00693264		1.5355
U1	-1.53936	0.0102423		1.53936
RP11-163G10.2	-1.54368	0.0441807		1.54368
MATK	-1.544	0.0013346		1.544
AC008155.1	-1.54963	0.000103428		1.54963
FASLG	-1.55329	0.00901607		1.55329
TMC8	-1.55483	0.00137331		1.55483
CD300C	-1.55492	0.0462686		1.55492
DMBT1	-1.55555	0.0276254		1.55555
TAF7L	-1.55923	0.00243685		1.55923
LINC01060	-1.56474	0.00521925		1.56474
AP000695.6	-1.56838	0.00894838		1.56838
DUOX2	-1.56897	0.00139084		1.56897
RN7SL823P	-1.57035	0.044195		1.57035
RP11-613M10.9	-1.57036	0.0463689		1.57036
ST13P12	-1.57379	0.0145974		1.57379
RP11-29H23.5	-1.57501	0.000486973		1.57501
TRAJ20	-1.57574	0.0213563		1.57574
RP11-23P13.6	-1.57921	0.00866218		1.57921
RNA5SP518	-1.58511	0.016351		1.58511
PAPPA	-1.5874	0.0389616		1.5874
TCHH	-1.59088	0.00423408		1.59088
RP11-166B2.7	-1.6026	0.00549868		1.6026
RP11-39K24.7	-1.60409	0.00114334		1.60409
RNVU1-7	-1.621	0.0234736		1.621
MAMDC4	-1.6261	0.00100712		1.6261
FENDRR	-1.62972	0.00112641		1.62972
RP11-703I16.3	-1.63314	0.0117287		1.63314
SNORD125	-1.63619	0.00280092		1.63619
CD300LB	-1.63835	0.0350533		1.63835
RNU1-52P	-1.64991	0.0234828		1.64991
TMSB4Y	-1.65046	0.00189357		1.65046
VAT1L	-1.65863	0.00663107		1.65863
RP11-254B13.3	-1.66744	0.0428247		1.66744
CCDC108	-1.67694	0.0328694		1.67694
RNVU1-18	-1.67747	0.00956563		1.67747
DUSP2	-1.67787	0.00101092		1.67787
ZBP1	-1.67791	0.0212691		1.67791
SVEP1	-1.68103	0.00613218		1.68103
LINC00514	-1.68629	0.0412078		1.68629
RP13-200J3.2	-1.68697	0.0374959		1.68697
RP11-78H18.2	-1.68856	0.0409732		1.68856
TLL1	-1.69573	0.013498		1.69573
C5orf46	-1.69968	0.0457113		1.69968
AC026904.1	-1.701	0.00177529		1.701
CLEC12B	-1.70885	0.0340852		1.70885
RASAL3	-1.71039	0.00248804		1.71039
RP11-6N17.2	-1.71231	0.0414246		1.71231
BLK	-1.71438	0.0315278		1.71438
NECAB2	-1.71452	0.0341806		1.71452
RP11-399D6.2	-1.71609	0.0486897		1.71609
RP11-377D9.3	-1.71889	0.00352983		1.71889
SETP17	-1.721	0.00143431		1.721
MEOX2	-1.72182	0.0152615		1.72182
ZAP70	-1.7237	0.011672		1.7237
TG	-1.72411	3.36252e-05		1.72411
NUP210L	-1.7244	0.00287318		1.7244
ARRDC5	-1.7298	0.000789073		1.7298
ARHGAP9	-1.73023	0.00149699		1.73023
AIM2	-1.73292	0.00478783		1.73292
BTNL8	-1.73305	0.0295286		1.73305
SHOX2	-1.73491	0.00253918		1.73491
RGS11	-1.73833	0.0103929		1.73833
RP3-395M20.8	-1.7389	0.0134774		1.7389
RNU1-3	-1.7389	0.026488		1.7389
SETP4	-1.74395	0.0037589		1.74395
IL21R	-1.74949	0.00796393		1.74949
MMP11	-1.759	0.021042		1.759
GOLGA8K	-1.76244	0.0493021		1.76244
AC145110.1	-1.76856	0.041098		1.76856
FAIM3	-1.7707	0.00280864		1.7707
TNR	-1.77961	0.0169785		1.77961
RP5-884G6.2	-1.793	0.0241171		1.793
MROH3P	-1.79528	0.0360044		1.79528
TRGC1	-1.79563	0.0295303		1.79563
PODNL1	-1.79654	0.00026368		1.79654
SIGLEC6	-1.80258	0.0194062		1.80258
CARD11	-1.81547	0.000313334		1.81547
TDO2	-1.81704	0.00503667		1.81704
MYT1	-1.81847	0.0198193		1.81847
PIEZO2	-1.81927	0.00033589		1.81927
RNF175	-1.83453	0.0453646		1.83453
RFX8	-1.83829	0.00959004		1.83829
RP11-429J17.8	-1.84732	0.0354307		1.84732
DCC	-1.85011	0.00549604		1.85011
RNU4-25P	-1.85232	0.00164599		1.85232
GPD1	-1.85852	0.00391681		1.85852
TTBK1	-1.8622	0.00544815		1.8622
RNU1-14P	-1.86322	0.0278526		1.86322
DNAH8	-1.86434	0.0100797		1.86434
CTD-2528L19.3	-1.87849	0.0414507		1.87849
ZBTB20-AS1	-1.8786	0.040219		1.8786
COL19A1	-1.88292	0.0155947		1.88292
SLC19A3	-1.88503	0.000957276		1.88503
ADAMTS14	-1.88957	0.000491137		1.88957
GAPDHP47	-1.90034	0.0318436		1.90034
RP11-353N4.5	-1.90444	0.0237809		1.90444
LPPR4	-1.90853	0.00367974		1.90853
ACAP1	-1.91087	0.00522802		1.91087
RP11-960L18.1	-1.91244	0.0426434		1.91244
RN7SL413P	-1.91577	0.00318496		1.91577
LTA	-1.91711	0.0415543		1.91711
SCN4A	-1.91867	0.0438417		1.91867
EGFEM1P	-1.92249	0.0239383		1.92249
UBE2CP2	-1.92464	0.0380179		1.92464
FFAR4	-1.9281	0.0112656		1.9281
PRPH	-1.93601	0.0281015		1.93601
EYS	-1.9368	0.00596285		1.9368
RP11-34E5.4	-1.95229	0.0287887		1.95229
CTC-523E23.5	-1.95244	0.0424459		1.95244
ENPP7	-1.95537	0.0442893		1.95537
ASGR2	-1.96729	0.0268267		1.96729
RNU1-130P	-1.96757	0.0308016		1.96757
LIPE	-1.97089	0.000246733		1.97089
RLTPR	-1.97459	0.00494891		1.97459
SIGLEC8	-1.97932	0.0119094		1.97932
DMP1	-1.9915	0.0453652		1.9915
MIR200B	-2.00031	0.0216947		2.00031
AANAT	-2.00089	0.0237546		2.00089
ZNF831	-2.00095	0.00151803		2.00095
RP11-536O18.2	-2.01084	0.029047		2.01084
RP11-434C1.3	-2.01221	0.0227382		2.01221
RN7SL217P	-2.02853	0.0361984		2.02853
SETP22	-2.03229	0.000524091		2.03229
CTC-378H22.2	-2.03479	0.0329147		2.03479
ELFN2	-2.03916	0.00377097		2.03916
NTNG2	-2.04186	0.00160645		2.04186
RGS16	-2.04625	0.0028835		2.04625
RP11-488L4.1	-2.04758	0.044914		2.04758
NYAP2	-2.04939	0.0426114		2.04939
GSG1L	-2.0661	0.0332211		2.0661
TREML2	-2.0681	0.000116795		2.0681
SEZ6L	-2.06899	0.0361997		2.06899
NETO1	-2.08412	0.00437952		2.08412
KIF26B	-2.09606	0.000795561		2.09606
C12orf42	-2.10737	0.0170695		2.10737
FNDC7	-2.11563	0.030339		2.11563
MUC3A	-2.11793	0.0022409		2.11793
TENM3	-2.1187	0.00444481		2.1187
FAM57B	-2.13582	0.0297035		2.13582
RP11-7F17.5	-2.14192	0.031272		2.14192
ASTL	-2.14254	0.0440715		2.14254
IL19	-2.1443	0.0222767		2.1443
RN7SL236P	-2.14595	0.000898445		2.14595
CSMD2	-2.152	0.00581772		2.152
RP11-84A19.2	-2.15275	0.0401443		2.15275
RP11-71G7.1	-2.16346	0.0422366		2.16346
RP11-342M1.6	-2.17284	0.0316359		2.17284
SLC24A2	-2.18325	0.00188312		2.18325
ZNF652P1	-2.1863	0.0412627		2.1863
KIF4CP	-2.19059	0.038938		2.19059
AC027601.1	-2.19993	0.0243163		2.19993
VWC2L	-2.20209	0.0461525		2.20209
RNU1-2	-2.20462	0.0315686		2.20462
RGSL1	-2.20993	0.0494898		2.20993
ABCA12	-2.23653	0.0414801		2.23653
PRDM7	-2.24024	0.0378799		2.24024
TNFRSF13B	-2.25183	0.00245658		2.25183
DCST1	-2.2604	0.0359844		2.2604
GREM1	-2.26303	0.0301373		2.26303
RNU6-492P	-2.26485	0.0350228		2.26485
FCRL3	-2.27221	0.00457736		2.27221
LINC01096	-2.28812	0.0295865		2.28812
RNU1-28P	-2.29266	0.0134846		2.29266
RNU6ATAC40P	-2.29961	0.0442121		2.29961
AC099326.1	-2.30874	0.0481745		2.30874
SETP7	-2.3137	0.00922849		2.3137
AC009518.4	-2.3267	0.0274128		2.3267
OGFOD1P1	-2.3327	0.0369035		2.3327
LMOD3	-2.33505	0.0175882		2.33505
LRRC15	-2.33654	0.00408803		2.33654
SEZ6	-2.34064	0.0495303		2.34064
SETP2	-2.34396	0.00260727		2.34396
RNA5SP447	-2.35242	0.0422541		2.35242
CTRC	-2.35312	0.0126143		2.35312
KCNA1	-2.35665	0.0120899		2.35665
ALPK2	-2.35671	0.00153888		2.35671
AC023590.1	-2.35696	0.00482871		2.35696
AC010149.4	-2.35869	0.0296165		2.35869
RNU1-63P	-2.36844	0.0347516		2.36844
AL590489.1	-2.36899	0.0293935		2.36899
COL6A6	-2.38111	0.00519192		2.38111
SV2B	-2.38384	0.000531252		2.38384
SPTA1	-2.38496	0.0272261		2.38496
SETP8	-2.38507	0.000369257		2.38507
RP11-95M15.2	-2.39012	0.0218162		2.39012
RP5-1112F19.2	-2.39153	0.0036837		2.39153
RNY4P16	-2.41879	0.0325486		2.41879
SNX18P7	-2.42236	0.0414428		2.42236
TRAV4	-2.42238	0.0492093		2.42238
RP11-58A17.2	-2.42294	0.0269701		2.42294
COL11A1	-2.42542	0.00202264		2.42542
HMGB3P20	-2.42728	0.0361785		2.42728
OR2L13	-2.44096	0.0476227		2.44096
RP11-351J23.2	-2.44353	0.044099		2.44353
CRLF2	-2.44544	0.0402158		2.44544
ADAMTS20	-2.45035	0.0112613		2.45035
DPP10-AS1	-2.45725	0.0340837		2.45725
RP11-726G23.7	-2.45811	0.00397937		2.45811
NRG3	-2.46556	0.0458079		2.46556
GABRR1	-2.46831	0.0208286		2.46831
XIRP1	-2.46831	0.024748		2.46831
KNOP1P5	-2.47102	0.0402871		2.47102
ALOX15	-2.47149	0.0427761		2.47149
POSTN	-2.47196	0.00508995		2.47196
MIR1343	-2.47657	0.0348537		2.47657
RP11-165P7.1	-2.48598	0.0475704		2.48598
TPO	-2.50126	0.0160572		2.50126
ASMT	-2.50406	0.0487487		2.50406
RN7SL817P	-2.50914	0.023575		2.50914
RP11-383C5.3	-2.51503	0.0119298		2.51503
PROSP	-2.52028	0.0316136		2.52028
RP11-190P13.1	-2.53807	0.0411572		2.53807
RP11-166O4.1	-2.54157	0.0131569		2.54157
CEP164P1	-2.54258	0.0291974		2.54258
RN7SL574P	-2.54397	0.029486		2.54397
NIP7P2	-2.54423	0.0412485		2.54423
RP11-151E14.1	-2.55384	0.0389838		2.55384
RP11-280O1.2	-2.55642	0.0257687		2.55642
TATDN2P2	-2.55793	0.0143868		2.55793
TRAV25	-2.55926	0.0397814		2.55926
TAT	-2.57492	0.0420978		2.57492
PNMA5	-2.57498	0.0342807		2.57498
RP11-326C3.2	-2.57544	0.00799753		2.57544
RP11-489E7.1	-2.57625	0.0424503		2.57625
AC019185.4	-2.57772	0.0328142		2.57772
RP11-807H22.7	-2.58266	0.0453875		2.58266
CYP4F2	-2.58496	0.0352855		2.58496
OPN4	-2.58825	0.0456223		2.58825
AC012507.3	-2.58941	0.0351985		2.58941
MS4A1	-2.59257	0.012074		2.59257
SPATA31C1	-2.59723	0.0358301		2.59723
RN7SL211P	-2.60154	0.0408288		2.60154
KB-1410C5.3	-2.60245	0.044501		2.60245
RP11-809M12.1	-2.61165	0.0112857		2.61165
KRT18P41	-2.62611	0.017619		2.62611
RP11-467L20.10	-2.63835	0.0405198		2.63835
RP11-394I13.1	-2.6499	0.032317		2.6499
MYH16	-2.65816	0.0113223		2.65816
MLK7-AS1	-2.67095	0.0282167		2.67095
HOXB13	-2.67935	0.000632683		2.67935
RN7SKP11	-2.68271	0.0285077		2.68271
C5orf64	-2.68837	0.0425925		2.68837
RP11-705O24.1	-2.69978	0.0415054		2.69978
RP11-510I5.4	-2.70227	0.0276644		2.70227
RP11-305P14.1	-2.70828	0.0430852		2.70828
AC104135.3	-2.71437	0.0297462		2.71437
PRR9	-2.72261	0.0295556		2.72261
RP4-800J21.3	-2.72544	0.0185857		2.72544
FABP4	-2.73308	0.00990512		2.73308
CADM2-AS1	-2.73404	0.0483729		2.73404
AQP4-AS1	-2.74186	0.0166723		2.74186
AC073071.1	-2.74403	0.0485195		2.74403
TCN1	-2.75182	0.0303656		2.75182
TBC1D27	-2.75264	0.0462035		2.75264
RP11-164H13.1	-2.75338	0.0447666		2.75338
PAX5	-2.7539	0.0159877		2.7539
RBFOX3	-2.75581	0.0269061		2.75581
TMEM72	-2.75582	0.0426306		2.75582
RN7SL842P	-2.76061	0.0215431		2.76061
DNM1P34	-2.76382	0.0485389		2.76382
CYP3A4	-2.76479	0.0360883		2.76479
AC090286.4	-2.76912	0.0265048		2.76912
RP11-556E13.1	-2.77705	0.0105407		2.77705
RP11-171A24.2	-2.77756	0.0268987		2.77756
AL109615.1	-2.78917	0.0358987		2.78917
SLC14A2	-2.79163	0.0164398		2.79163
XXYLT1-AS2	-2.79226	0.0227593		2.79226
FAM186A	-2.79738	0.0244268		2.79738
ANP32BP3	-2.79745	0.0156913		2.79745
SLC5A10	-2.7997	0.0435215		2.7997
AC007682.1	-2.80956	0.0302775		2.80956
HABP2	-2.81476	0.0273547		2.81476
ANKRD30A	-2.81816	0.0272575		2.81816
CNR2	-2.81953	0.0127971		2.81953
DSCAM-AS1	-2.82704	0.0422467		2.82704
KCNH5	-2.84096	0.0410423		2.84096
RP11-71G12.1	-2.84463	0.0435196		2.84463
RP11-292D4.3	-2.84513	0.0485215		2.84513
SRRM4	-2.84605	0.00852236		2.84605
TRGV5	-2.84635	0.0484668		2.84635
RP11-335E14.1	-2.85006	0.0309919		2.85006
AC091969.1	-2.85628	0.00828		2.85628
CCDC42	-2.85704	0.031679		2.85704
ALAS2	-2.85724	0.00867735		2.85724
RP11-168K9.2	-2.86162	0.0487987		2.86162
RIOK3P1	-2.86529	0.0356298		2.86529
RP11-533E19.5	-2.86543	0.0147219		2.86543
MLANA	-2.86917	0.0466708		2.86917
LINC00309	-2.89416	0.0492296		2.89416
RP11-386G11.3	-2.89454	0.0338074		2.89454
PADI4	-2.92292	0.00936804		2.92292
RN7SL460P	-2.92524	0.0358346		2.92524
AC005009.1	-2.93297	0.0298176		2.93297
CACNG1	-2.93691	0.022599		2.93691
CLEC2A	-2.93873	0.0410152		2.93873
RP11-428C19.5	-2.93969	0.0408933		2.93969
AC112715.2	-2.9426	0.0415824		2.9426
ADAM29	-2.95113	0.0221823		2.95113
ACTN4P2	-2.95231	0.0415849		2.95231
ANKRD30BL	-2.95365	0.00255369		2.95365
AL591516.4	-2.95477	0.0427191		2.95477
RP11-432M8.16	-2.96046	0.0338876		2.96046
RP11-119D18.1	-2.96438	0.043405		2.96438
CTD-2540B15.6	-2.97046	0.0488194		2.97046
RP11-184D12.1	-2.99015	0.0433948		2.99015
RP11-308N19.4	-2.99212	0.0187049		2.99212
RP11-895K13.2	-3.01366	0.0300459		3.01366
AC005007.3	-3.01504	0.0320902		3.01504
CTB-31O20.9	-3.01607	0.039856		3.01607
[truncated: 643 more rows]

## Sheet: 工作表2
Table S4. The up and down-regulated DEGs of GSE133296 datasets.|logFC|＞1,P.Value＜0.05.
GENE	logFC	P.Value
MUC17	7.63727	0.000185332
ADIPOQ	6.33156	9.58277e-05
RP11-1109M24.11	6.20251	0.000253325
C6orf222	6.15226	0.000983581
DSCR4-IT1	5.94899	2.48778e-05
LRTM2	5.80482	0.00631276
AP000619.5	5.72173	0.00128676
CTD-2329C7.2	5.63363	0.000211308
RP11-566K19.9	5.57567	0.00151404
DUX4L16	5.55765	0.000816969
RP11-465O11.2	5.54371	0.000568015
AIRE	5.53057	7.23e-06
NPVF	5.49183	0.0120613
GNAT3	5.45542	0.00999369
MOXD2P	5.43066	0.0146754
IDI2	5.42242	0.00126344
RP11-24M17.5	5.41086	0.013564
AL163952.1	5.36283	3.9049e-05
RP11-552E4.3	5.32512	4.46e-06
RP11-2N5.2	5.30306	3.06789e-05
PGA3	5.30239	0.0189808
TRIML2	5.30174	2.96969e-05
ENPP7P10	5.26959	0.00605006
PSG1	5.24459	0.0185714
RP11-98C1.1	5.20547	0.0120286
CTC-340I23.2	5.20262	8.80988e-05
C3P1	5.19007	0.0141109
RP11-347P5.1	5.17004	0.00344512
CHIA	5.16289	0.00890374
SPANXN5	5.15662	0.0177057
CTD-2028E8.1	5.15331	0.0163662
FAM205B	5.15117	0.000338719
GOLGA6L2	5.14916	0.00314742
KIF2B	5.1481	0.00899341
LINC01142	5.14484	0.000236847
C8orf74	5.14405	0.0245793
SULT1C3	5.13839	0.0171401
AC005235.1	5.13323	1.7317e-05
GABRA6	5.10071	0.0101763
IGLC5	5.09255	0.00803845
RP11-483E23.2	5.08011	0.00236258
RP11-198M11.2	5.07944	0.0177964
RP3-416J7.4	5.07461	0.0230585
NPAP1P4	5.05685	0.0166805
KRT74	5.05535	0.0105763
RP11-387D10.3	5.05421	0.00230521
CACNA1C-AS4	5.05281	0.0153736
PABPC1P13	5.01822	0.000200385
AC012075.1	5.016	9.60606e-05
C8B	5.01585	0.0200154
RP11-572C15.5	4.98825	0.00455906
RP11-214L19.1	4.97328	0.0369505
RP11-174G17.2	4.97281	0.0201682
CTB-31N19.2	4.96927	0.0120198
PIWIL3	4.96568	0.00972748
C18orf63	4.94106	0.00634587
PRDM14	4.94096	0.0151204
ZIM3	4.93998	0.0149354
ISL1	4.93926	0.000149089
RP11-231E4.2	4.89163	0.0206781
RP11-67K19.3	4.89038	0.0127184
HCCAT5	4.87502	0.00982526
FAM90A12P	4.8748	0.0286404
CTA-929C8.6	4.86569	0.00117483
GP2	4.85646	0.00371609
RP11-134D3.1	4.84277	0.0126104
RP11-62I21.1	4.83624	0.0049823
GPR158-AS1	4.83531	0.00983252
RP11-90P5.2	4.83267	8.42e-06
RP11-127O4.3	4.82926	0.00929868
C2orf78	4.8171	0.00154951
RNF113B	4.81415	0.0276544
RP11-1079K10.5	4.813	0.0126961
RP11-132N15.2	4.80123	0.0204345
PADI6	4.79157	0.0204749
SAMD7	4.78519	0.0246397
CABP5	4.78171	0.0109022
OPRM1	4.77542	0.00288966
DRD3	4.77338	0.00201504
RP11-56L13.1	4.76416	0.0410593
RP4-734C18.1	4.76064	0.0122179
TRBJ2-3	4.7501	6.8e-07
LINC00710	4.74812	0.0311507
RP5-843L14.1	4.70704	0.0123719
RP11-626I20.3	4.68697	0.0476494
METTL15P3	4.67141	0.0199101
RP3-448I9.2	4.66489	0.0198799
AC104024.2	4.65909	0.0223316
RP11-659P15.2	4.65654	0.0441639
CEACAM8	4.65297	0.0145571
RP5-1068H6.1	4.65183	0.0451333
LHX8	4.64957	0.0129747
KB-173C10.1	4.64768	0.00174844
SLC6A5	4.647	0.0297387
UGT3A1	4.64333	0.0067818
RP11-553E24.2	4.63945	0.0245137
LINC00489	4.63922	0.0153743
RP11-28G8.1	4.63749	0.00219994
C16orf97	4.62532	0.0278059
RP5-1166F10.1	4.61556	0.02054
PRAMENP	4.61351	0.00750462
RP11-157D23.1	4.60651	0.00338445
CER1	4.59668	0.00198132
CYP11B1	4.59477	0.00940626
CHIAP2	4.5934	0.0117335
LINC00955	4.59059	0.031416
AC004448.5	4.58788	0.0299595
RP11-572H4.1	4.58211	0.0301957
CTD-2313J23.1	4.58094	0.035716
RP11-163O19.3	4.57794	0.0487555
TBX5	4.57024	0.0131879
RP4-761J14.8	4.56221	0.0227545
RP1-29C18.10	4.55426	0.00504554
CLEC17A	4.55425	0.000765008
GJD2	4.54505	0.00389009
PDILT	4.53304	0.00254566
AC009960.7	4.53074	0.0048673
DCD	4.51358	0.0112655
RP11-972P1.8	4.5111	0.0387395
OR4M1	4.49163	0.0435366
RP5-919F19.5	4.49163	0.0435366
RP11-264C15.2	4.4899	0.0373074
C11orf89	4.48928	0.0438655
RP11-61O1.1	4.48246	0.049787
IMPG1	4.47276	0.0442693
RP5-951N9.1	4.4669	0.0408242
CTD-2281E23.1	4.45336	0.0263521
RP11-730A19.7	4.44532	0.0150071
RP11-204P2.3	4.44492	0.0242648
DDX11L8	4.43805	0.00571225
CD1B	4.43764	0.000709119
MIR548I2	4.43447	0.0390112
RP11-95M15.1	4.43092	0.0305001
RP11-282I1.2	4.42961	0.00332115
CTD-2534I21.9	4.42524	0.022437
CTD-2314G24.2	4.4216	5.4598e-05
RP11-515O17.3	4.40544	0.0210177
AC018470.4	4.40519	0.0231694
C5orf38	4.40423	0.0387431
AC018638.1	4.40292	0.0292128
FCAMR	4.40276	0.00284253
UMOD	4.37974	0.0110022
KIAA1024L	4.37584	0.00242745
AC010729.1	4.36944	0.0248886
RP11-104D21.1	4.36909	0.0442424
CTD-2014N11.2	4.36615	0.0206237
SUN5	4.36605	0.0335355
XXbac-BPG254F23.7	4.35413	0.0418671
SSTR5-AS1	4.35257	0.012886
RP11-14K3.1	4.34332	0.0202352
MIR3167	4.34194	0.043596
RP11-17E2.2	4.33934	0.0382998
TMPRSS12	4.33748	0.00430546
GABRG2	4.33519	0.00895659
FAM217A	4.33493	0.0200522
RNU7-22P	4.33444	0.00338122
KB-1410C5.2	4.33085	0.0130036
DIO2-AS1	4.33062	0.0172054
GYPA	4.33035	0.0418791
OR10A7	4.32847	0.00981886
RP11-62G11.2	4.32047	0.0474358
RP4-781K5.7	4.31859	0.0121542
NAP1L4P2	4.31665	0.0258876
AC104131.1	4.29891	0.0045746
NKX2-1	4.29603	0.0161336
C9orf62	4.28258	0.0419485
RP11-1085N6.3	4.28258	0.0419485
AC005262.3	4.28169	0.00824217
KLK2	4.27637	0.0205669
RP11-37O16.6	4.27576	0.0281349
RP11-278H7.1	4.27038	0.0365823
KCNMB3P1	4.2631	4.5513e-05
RP11-122A21.2	4.25414	0.0426791
RP11-549A6.1	4.25177	0.0235123
AC018892.3	4.24682	0.0453889
RP11-335K5.2	4.23945	0.0114854
RP11-118E18.2	4.23075	0.0114798
TRAV20	4.22902	0.00134483
LGALS16	4.22559	0.0414122
ACPT	4.21422	0.00891854
AC093110.3	4.21347	0.0338265
CTD-2015A6.2	4.20461	0.00849831
AP000472.3	4.20204	0.0182052
RP11-16L14.2	4.19745	0.0255461
C8A	4.1913	0.0431149
RP11-29P20.1	4.1912	0.0164109
RP11-749H20.1	4.18775	0.0251514
LA16c-361A3.3	4.1841	0.0185574
CEACAM7	4.18015	0.0484105
RP11-753A21.2	4.17546	0.0165688
RP11-208N14.4	4.17042	0.0484962
CALR3	4.17027	0.00674449
KRT24	4.16352	0.01357
FAM3D	4.16211	0.0382855
OR9G1	4.16098	0.0320656
AC005102.1	4.16052	0.0095817
TRBV10-1	4.15548	0.00848703
KIAA1239	4.14893	0.00632894
POM121L2	4.14884	0.0038392
CYP2C61P	4.14679	0.0429349
RP11-316M20.1	4.14566	0.0112969
RP6-99M1.1	4.1453	0.0401315
LINC00901	4.14089	0.0479786
KRT76	4.13414	0.0431734
AC106876.2	4.13194	0.0175086
RP11-86H7.6	4.12672	0.0333754
SIRPD	4.12529	0.00734221
RP11-354E11.2	4.12427	0.00852039
SERPINA9	4.12084	0.0231507
RP11-726G23.12	4.12004	0.0369315
TNR-IT1	4.11612	0.000230269
SPANXN3	4.10692	0.00490944
GUCY2GP	4.10504	0.0458726
KRT73	4.10388	0.0319716
RP11-353M9.1	4.10151	0.00977259
RP11-304L19.4	4.09854	0.0394822
NUTM1	4.09822	0.0211489
HNRNPDLP2	4.09542	0.0109013
OR2A2	4.07136	0.0145482
LGALS14	4.06637	0.0126162
RP11-632K5.3	4.06422	0.0229588
LUZP4P1	4.06348	0.0491493
RP1-37N7.1	4.06313	0.0023443
AC091493.1	4.05636	0.00532768
AE000660.4	4.05453	0.0178409
RP11-567L7.6	4.05278	0.046505
RP4-591B8.3	4.04441	0.0178876
RP11-169L17.3	4.04248	0.0410696
CTC-444N24.13	4.03958	0.0446679
RP11-102N11.1	4.03743	0.0468972
SPATA31A6	4.03518	0.0324887
RP13-991F5.2	4.03463	0.000766541
RP11-88I21.1	4.03382	0.0428726
CTC-430J12.2	4.02765	0.0282069
IGLV5-37	4.02685	0.0283229
CLYBL-AS2	4.02665	0.0495201
AC091814.3	4.02336	0.00786549
AJ003147.9	4.01716	0.0231721
KNG1	4.0149	0.0237617
LA16c-366D3.1	4.01167	0.026761
GABRB1	4.00843	0.0153528
MIR1324	4.0037	0.0263561
RP13-401N8.3	4.00307	0.0404985
CTB-27N1.1	4.00144	0.0109006
KRT37	3.99919	0.00795781
CTD-2541J13.2	3.99653	0.028069
RP5-845O24.3	3.99432	0.0488398
RP11-69C17.3	3.9933	0.0482805
RP11-619A14.3	3.99291	0.03873
RP11-669M2.1	3.99199	0.0276524
ACTG1P2	3.99163	0.0455608
PRSS55	3.9914	0.0130225
GGNBP1	3.98653	0.035186
RP11-31I22.4	3.98454	0.0183046
RP11-521D12.2	3.98454	0.0213065
RP11-440G9.1	3.98294	0.0313249
GPR79	3.97897	0.0485995
DDX11L9	3.96585	0.0406731
RP11-84A1.3	3.95922	0.0470417
RN7SL420P	3.95897	0.0115339
RP11-893F2.6	3.95768	0.016566
RP11-575B7.3	3.94945	0.00193058
RP1-212P9.2	3.94444	0.00552589
RP5-1092A11.5	3.94392	0.00514616
C9orf135-AS1	3.94307	0.0457472
HTR5BP	3.9366	0.0148813
AC092364.4	3.93209	0.0420571
TUSC5	3.92833	0.0248264
RP11-195F19.5	3.92742	0.0268098
RP11-1094M14.8	3.91811	0.045381
CTD-2089N3.1	3.91633	0.00231127
CTA-125H2.2	3.91609	0.0465093
RP11-680F20.5	3.91545	0.00546392
SPATA8-AS1	3.91445	0.0196439
ACMSD	3.9144	0.0129954
RP11-255M2.2	3.91367	0.00507456
TMEM247	3.91132	0.0438268
RP11-470L19.2	3.90942	0.041365
RP11-545A16.1	3.90697	0.0267708
TMEM207	3.90451	0.0375821
PPY	3.90322	0.0425663
DRGX	3.90142	0.0483331
TRBV24-1	3.90117	0.00835738
SLC16A1P1	3.89987	0.0265107
CTB-178M22.1	3.89747	0.0454365
SNX18P2	3.89723	0.0398824
AC107399.2	3.89454	0.000716083
TRPC7	3.89417	0.0460503
LGALS9B	3.8937	0.0257943
RP11-222A5.1	3.89313	0.0126993
CTD-2547H18.1	3.89306	0.0387564
LINC00559	3.89205	0.0478936
OR2H1	3.89205	0.0478936
C8orf22	3.89065	0.0172045
RAD23BP2	3.88992	0.0398581
AC114752.3	3.88643	0.0446604
AL353662.1	3.88538	0.012639
RP11-343N15.1	3.8804	0.03888
FERD3L	3.87648	0.0269656
RP11-619L12.3	3.87297	0.0219397
MYH4	3.87289	0.0225373
CRYBA2	3.87244	0.0226934
RP11-54O7.18	3.87169	0.00645716
CYP2C9	3.86681	0.00892696
RP11-432N13.3	3.86577	0.0211839
PRKRIRP9	3.86164	0.0226835
OR14J1	3.85911	0.0208274
AC092664.1	3.85681	0.0341322
RP11-221J22.2	3.85608	0.0169124
RP11-58E21.1	3.85453	0.0173806
XXyac-YM21GA2.1	3.84814	0.0496132
SBF1P1	3.84554	0.0161589
RP4-715N11.2	3.84498	0.0367375
RPTN	3.84438	0.0400037
AC006548.19	3.84223	0.0460445
TARS2P1	3.84223	0.0460445
RP11-114H23.2	3.84084	0.0224718
RPS24P18	3.8397	0.00892723
TRIM51FP	3.83289	0.0146949
DSG4	3.82815	0.00379397
RP11-63N3.1	3.82523	0.0484658
PKLR	3.82498	0.0167389
GNRHR2P1	3.82135	0.0420906
TGM4	3.81434	0.0212932
RP11-29B9.2	3.80771	0.0397451
LINC01007	3.80771	0.0397451
RP1-90J4.1	3.80558	0.0197338
TRAV6	3.80036	0.00775768
RN7SL163P	3.79578	0.0204496
CTD-2643K12.3	3.79561	0.00781066
RP11-531H8.2	3.79505	0.0398417
KRT43P	3.78585	0.039427
RP11-1069G10.2	3.78474	0.00938022
RP11-101O21.1	3.78339	0.0242335
REG3A	3.78318	0.0434095
RP3-366N23.4	3.78306	0.0431232
CTC-360P9.5	3.77787	0.0171938
RP11-278H7.4	3.77642	0.0194707
EXOC7P1	3.7752	0.00866202
RP11-295G24.4	3.77257	0.0206659
AL928768.3	3.76134	0.00620155
KRT72	3.76035	0.0356507
PRAP1	3.7501	0.0154745
KRT77	3.74999	0.0254911
RP11-282O18.7	3.74906	0.0400979
ZFAT-AS1	3.74875	0.00464676
AC009236.2	3.74643	0.0212346
RDH8	3.74572	0.00863352
OVAAL	3.74497	0.045045
MTND5P29	3.74007	0.0425845
RP11-331G2.6	3.73945	0.0258165
TBCAP2	3.73416	0.0466784
LINC00945	3.72994	0.0426943
C12orf40	3.72892	0.00616958
GPR26	3.72578	0.0238038
RP11-78H24.1	3.72449	0.0254392
AC017084.1	3.72326	0.0171644
RP5-857K21.2	3.72009	0.0386466
PRB4	3.71856	0.0114794
OR2F1	3.71854	0.0422847
RP11-571E6.4	3.7184	0.0425587
STATH	3.71262	0.0497791
CTC-360G5.6	3.71226	0.0117326
HTR3C	3.71168	0.0491044
RP11-468N14.09	3.71168	0.0491044
AC092661.1	3.70865	0.0220584
AC018799.1	3.70017	0.0421691
RP11-566K19.5	3.69997	0.0121865
RP11-443B9.1	3.69347	0.0476964
LINC00434	3.69207	0.0337486
KRT2	3.69028	0.0106
AC011755.1	3.68893	0.0385178
CTD-2195M15.1	3.68893	0.0385178
HMGN2P26	3.68819	0.0395754
DUX4L9	3.68801	0.00874249
MTND2P31	3.686	0.038159
DMRT2	3.68266	0.00451749
RP11-110L15.2	3.67695	0.0111921
POTEA	3.67678	0.0418667
HMGN2P34	3.66633	0.0123627
CCR12P	3.66579	0.0191701
SPIC	3.66199	0.0191575
RP11-56P9.8	3.65769	0.0416172
ELOVL2-AS1	3.65709	0.0155982
RP3-429O6.1	3.65527	0.0191474
RP4-710M16.2	3.65254	0.022404
TRPC5	3.65141	0.0118237
RP5-1107A17.2	3.65002	0.00886905
RP11-457I16.2	3.64961	0.0340096
RP11-548K12.5	3.6444	0.0294069
RP11-153K16.2	3.64355	0.0199849
RP13-379L11.2	3.64306	0.0384652
AC092850.1	3.64064	0.0196098
C7orf34	3.63993	0.0246002
AE000662.92	3.63594	0.0394329
CTD-2515H24.4	3.6326	0.0431989
CTC-782O7.1	3.63208	0.0449703
PAH	3.63175	0.00729825
RLBP1	3.62775	0.0475634
ARHGEF19-AS1	3.62446	0.0404717
RP11-197N18.7	3.6237	0.037222
HAR1B	3.62366	0.048332
KIR3DL1	3.62232	0.0203933
RP11-39H3.1	3.62139	0.0231755
RP5-1061H20.3	3.6209	0.0104722
RP11-152P17.1	3.619	0.00937923
RP11-20G6.2	3.61855	0.0483417
RP13-77O11.11	3.61674	0.0488279
RP11-467I20.5	3.61074	0.0427267
MAGEB3	3.60857	0.0458226
RP11-27G13.4	3.60857	0.0458226
RP11-297L17.2	3.60618	0.0377724
RP11-283C24.1	3.60281	0.00519876
NDUFS5P5	3.60088	0.0105944
RPL39P26	3.59808	0.0475244
RP11-18H21.2	3.59412	0.0276443
NEUROD4	3.59153	0.0441113
PRDM12	3.59144	0.0379735
RP11-511B23.4	3.59144	0.0379735
OR10Q1	3.59015	0.018577
RPL7L1P10	3.59015	0.018577
LINC00705	3.58968	0.038
RP11-964E11.2	3.5884	0.00966726
HMGN2P11	3.57787	0.0185674
RP11-158C21.3	3.57787	0.0185674
AL136115.1	3.57178	0.0447561
AC003958.2	3.57143	0.0367816
LINC00971	3.57064	0.0467127
NUS1P4	3.56904	0.0271011
PRKACG	3.56836	0.0128235
CTC-510F12.6	3.56775	0.0223805
OR52R1	3.5635	0.0391627
AC017048.1	3.56257	0.0491632
RP11-166A12.1	3.5553	0.0219766
CSF2	3.55452	0.0371132
GS1-279B7.1	3.55173	0.0488057
RP11-402L5.1	3.54722	0.0438704
RP11-536K7.5	3.54544	0.0183964
RP11-398G24.2	3.54412	0.0281518
TRAV1-1	3.52713	0.0161703
TRGV6	3.52648	0.0411856
RP11-846C15.2	3.5239	0.0204158
KIAA0125P2	3.52319	0.0380341
TRDJ1	3.52319	0.0380341
RP11-486A14.1	3.52257	0.0422883
RP11-473M14.3	3.52133	0.0393906
TBR1	3.51969	0.0246035
ISL2	3.51574	0.0192302
RP11-454P21.1	3.51545	0.0105906
OSBPL9P5	3.50866	0.0160927
RP11-346D6.4	3.5063	0.0197829
ATP4B	3.5026	0.0178522
RP11-485G7.6	3.5026	0.0272269
SFRP2	3.49894	0.00470425
AC010524.4	3.49682	0.0428442
GYG1P2	3.49179	0.020933
TRAJ53	3.49163	0.0381975
TREML5P	3.48636	0.0406196
HTR5A	3.48563	0.047346
SLC8A3	3.4856	0.00477779
TRAJ4	3.48139	0.0242546
RP11-496H15.2	3.47983	0.039117
RP11-554A11.5	3.47897	0.0381253
AC124944.3	3.4709	0.0263415
AC079776.3	3.46966	0.0382015
RP1-273G13.3	3.46759	0.0433293
KB-1930G5.4	3.46653	0.0379495
RP11-509E10.1	3.46504	0.0332769
RP11-809N15.3	3.45855	0.0336575
LHX3	3.45254	0.039284
AC007389.1	3.45063	0.0228774
VPS25P1	3.45006	0.00648158
RP11-486B10.3	3.44617	0.0388145
RN7SL549P	3.44379	0.00760066
RP11-171N4.1	3.44345	0.02278
BARX1	3.44201	0.0251446
MICC	3.4419	0.0402853
TFAP2D	3.44178	0.0499016
ANKRD33B-AS1	3.44072	0.0416871
RP11-132M7.3	3.43835	0.0229287
SPATA3	3.43719	0.0263156
KRBOX1-AS1	3.43615	0.0481048
RP11-56B16.5	3.43605	0.0280342
RP5-1085F17.4	3.436	0.0419514
CTA-313A17.2	3.42872	0.0109465
RP11-441A11.1	3.42632	0.00676017
CTD-2544L4.1	3.42377	0.0192557
RP11-609N14.1	3.42286	0.0483311
RP11-757G1.5	3.41855	0.0382866
RP11-491H9.3	3.41478	0.0416266
RP11-64C12.8	3.41478	0.0416266
IGHV3-35	3.41382	0.0440375
BRDT	3.4133	0.00627386
RP11-1023P17.2	3.4115	0.0186371
AGBL1	3.40839	0.0148753
AC022861.1	3.40741	0.019218
GRM5-AS1	3.40239	0.0423965
SLC34A1	3.39292	0.0275511
RP11-409K15.1	3.38961	0.0397553
RP11-67M9.1	3.38961	0.0397553
RP11-640N20.6	3.38746	0.0213828
KIAA0087	3.38512	0.0480467
ANKRD30BP1	3.38375	0.0254392
HCG22	3.37794	0.0296335
DNAJB7	3.37779	0.0381655
EPN2-AS1	3.37618	0.0355734
RP11-153K16.1	3.37532	0.0221915
SFTPA1	3.37407	0.0493975
AC097713.4	3.37269	0.00649056
RP11-482M8.3	3.37222	0.0382178
AQP8	3.36976	0.0384737
AC105443.2	3.36953	0.0472575
RP11-687D19.1	3.36817	0.0410336
IGHV3-33-2	3.36774	0.0493568
RP11-21C4.5	3.36688	0.0220997
TREML4	3.36504	0.0448907
MYT1L	3.36063	0.0300007
LA16c-312E8.2	3.35375	0.0184016
RP3-448I9.1	3.35359	0.0488339
RP11-63E9.1	3.35358	0.0476171
RP11-349P19.1	3.34966	0.019008
RP11-553L6.3	3.34294	0.0183512
AP000563.2	3.34259	0.0345032
RP11-63E5.1	3.34144	0.0408203
AC007099.1	3.34043	0.0361118
AC098817.5	3.3397	0.0358886
RP11-196O2.1	3.33933	0.0419556
RP11-747I9.1	3.32395	0.023761
MIR629	3.32335	0.0472201
ZAN	3.32025	0.0202574
OR11L1	3.31257	0.0406597
HMGB1P17	3.31187	0.000810249
RP11-298D21.1	3.31022	0.0238113
AC144835.1	3.30847	0.0377571
FAM170B-AS1	3.2991	0.0192869
RP11-129J12.1	3.29454	0.0129606
VAV3-AS1	3.29415	0.0335101
RP13-379O24.3	3.29309	0.0493527
RP11-440I14.3	3.29306	0.0450286
KRT18P40	3.29188	0.0431753
GSG1	3.29145	0.043787
XXbac-BPG299F13.14	3.28921	0.0442545
IGLL5	3.28917	0.031859
LA16c-380A1.1	3.28806	0.0312066
RP11-168L7.1	3.28654	0.0395646
RP5-1070A16.1	3.28568	0.042551
RN7SL53P	3.28457	0.0404203
VTI1BP3	3.28441	0.0189857
GZMAP1	3.28425	0.0331219
SPRR4	3.28364	0.0301677
RNU6-1271P	3.28294	0.0449611
RP5-894D12.3	3.28085	0.0226053
RNU6-382P	3.27846	0.0395583
HSPD1P8	3.27397	0.0324262
RP11-567N4.2	3.26755	0.0411933
SERPINB11	3.26416	0.041491
AC093690.1	3.26259	0.0316515
RP11-341A22.2	3.2608	0.0435244
RP13-614K11.1	3.25985	0.0257715
NECAP1P1	3.25453	0.0441911
GAGE2C	3.25177	0.0349892
RP11-26L20.3	3.25177	0.0349892
RP1-71H24.1	3.24864	0.045926
LINC00391	3.24545	0.0182139
PGC	3.24446	0.0197151
RP11-458K10.2	3.2434	0.0371526
CTD-3193O13.13	3.23321	0.016475
EPX	3.23144	0.0441277
RP11-550H2.2	3.22862	0.0424364
GRXCR2	3.22763	0.0179282
SLC7A14	3.22212	0.021664
FAM9A	3.22147	0.00904856
SLC46A2	3.21553	0.0116667
MCHR2	3.21386	0.0439749
RP11-314C9.2	3.20545	0.0364301
OR7E158P	3.19995	0.0317635
RP11-451F20.1	3.19855	0.0199356
GUCY2F	3.19721	0.0085872
RP11-275I4.2	3.19167	0.0251974
RP11-1028N23.3	3.18868	0.0326859
HMGB1P25	3.1873	0.00964408
CUBNP2	3.18708	0.0179528
FCER2	3.18399	0.0223135
RP11-70F11.11	3.1788	0.0428373
PLG	3.17592	0.0326401
C12orf77	3.17559	0.0413722
C14orf166B	3.16563	0.0410326
RP11-420K8.1	3.16483	0.00977492
RP11-697H9.2	3.1609	0.0495412
ZNF90P2	3.15892	0.0374263
AHCYP3	3.15846	0.0321652
RPL3L	3.15364	0.0167204
UNC5D	3.15268	0.0478144
CCER1	3.14294	0.00881974
CTD-2043I16.1	3.13339	0.042648
FCRL4	3.12662	0.0162816
AC135048.1	3.1255	0.0264304
BCRP6	3.12326	0.0424697
IGHV3-37	3.12326	0.0424697
CTD-2583P5.3	3.1202	0.0464483
AC012506.4	3.11885	0.0212161
ASIC5	3.11817	0.0417823
GOLGA8DP	3.11817	0.0417823
GTF2IP2	3.11817	0.0417823
RP1-37J18.2	3.11817	0.0417823
RP4-591L5.1	3.11405	0.0499182
IGKV2D-14	3.11168	0.0348565
RP1-127L4.7	3.10985	0.0395461
NEFHP1	3.10981	0.0171141
MIR4684	3.09959	0.0490544
OR2A25	3.09805	0.0418791
BIN2P1	3.0925	0.047864
CTD-2333K2.1	3.09191	0.0466576
RP11-51F16.9	3.08859	0.0344777
AC005281.2	3.08441	0.0355116
MS4A5	3.08441	0.0355116
RP4-620F22.3	3.07846	0.044029
RP11-324L3.1	3.07704	0.0334933
RERG-AS1	3.07316	0.0352988
CTD-2017C7.1	3.07155	0.0197947
DCUN1D2-AS	3.07034	0.0350675
AP000146.2	3.06618	0.0340415
Z82214.2	3.06303	0.0350404
IRX6	3.06274	0.00679199
OR2W2P	3.05136	0.0239489
RP1-170O19.14	3.05006	0.0348686
RP11-973N13.4	3.04978	0.0329495
GS1-519E5.1	3.04592	0.00351246
RP11-164C12.2	3.04544	0.0387244
TFAP2B	3.0427	0.0486612
SMIM11P1	3.04172	0.0154915
RP11-561B11.3	3.04172	0.0317865
SLC1A6	3.04043	0.0105679
WDR87	3.03854	0.0114683
RP11-280K24.4	3.03679	0.0272658
SLC25A3P2	3.03498	0.0133611
RP11-61E11.1	3.03388	0.0175708
RP5-921G16.1	3.03034	0.0483632
KLB	3.02991	0.00728598
RP11-794C22.2	3.02286	0.0381011
RP11-565A3.2	3.02251	0.0490574
IL5	3.02009	0.0400027
CTD-2561B21.4	3.01864	0.0169475
CTB-31O20.9	3.01607	0.039856
AC005007.3	3.01504	0.0320902
RP11-895K13.2	3.01366	0.0300459
RP11-308N19.4	2.99212	0.0187049
RP11-184D12.1	2.99015	0.0433948
CTD-2540B15.6	2.97046	0.0488194
RP11-119D18.1	2.96438	0.043405
RP11-432M8.16	2.96046	0.0338876
AL591516.4	2.95477	0.0427191
ANKRD30BL	2.95365	0.00255369
ACTN4P2	2.95231	0.0415849
ADAM29	2.95113	0.0221823
AC112715.2	2.9426	0.0415824
RP11-428C19.5	2.93969	0.0408933
CLEC2A	2.93873	0.0410152
CACNG1	2.93691	0.022599
AC005009.1	2.93297	0.0298176
RN7SL460P	2.92524	0.0358346
PADI4	2.92292	0.00936804
RP11-386G11.3	2.89454	0.0338074
LINC00309	2.89416	0.0492296
MLANA	2.86917	0.0466708
RP11-533E19.5	2.86543	0.0147219
RIOK3P1	2.86529	0.0356298
RP11-168K9.2	2.86162	0.0487987
ALAS2	2.85724	0.00867735
CCDC42	2.85704	0.031679
AC091969.1	2.85628	0.00828
RP11-335E14.1	2.85006	0.0309919
TRGV5	2.84635	0.0484668
SRRM4	2.84605	0.00852236
RP11-292D4.3	2.84513	0.0485215
RP11-71G12.1	2.84463	0.0435196
KCNH5	2.84096	0.0410423
DSCAM-AS1	2.82704	0.0422467
CNR2	2.81953	0.0127971
ANKRD30A	2.81816	0.0272575
HABP2	2.81476	0.0273547
AC007682.1	2.80956	0.0302775
SLC5A10	2.7997	0.0435215
ANP32BP3	2.79745	0.0156913
FAM186A	2.79738	0.0244268
XXYLT1-AS2	2.79226	0.0227593
SLC14A2	2.79163	0.0164398
AL109615.1	2.78917	0.0358987
RP11-171A24.2	2.77756	0.0268987
RP11-556E13.1	2.77705	0.0105407
AC090286.4	2.76912	0.0265048
CYP3A4	2.76479	0.0360883
DNM1P34	2.76382	0.0485389
RN7SL842P	2.76061	0.0215431
TMEM72	2.75582	0.0426306
RBFOX3	2.75581	0.0269061
PAX5	2.7539	0.0159877
RP11-164H13.1	2.75338	0.0447666
TBC1D27	2.75264	0.0462035
TCN1	2.75182	0.0303656
AC073071.1	2.74403	0.0485195
AQP4-AS1	2.74186	0.0166723
CADM2-AS1	2.73404	0.0483729
FABP4	2.73308	0.00990512
RP4-800J21.3	2.72544	0.0185857
PRR9	2.72261	0.0295556
AC104135.3	2.71437	0.0297462
RP11-305P14.1	2.70828	0.0430852
RP11-510I5.4	2.70227	0.0276644
RP11-705O24.1	2.69978	0.0415054
C5orf64	2.68837	0.0425925
RN7SKP11	2.68271	0.0285077
HOXB13	2.67935	0.000632683
MLK7-AS1	2.67095	0.0282167
MYH16	2.65816	0.0113223
RP11-394I13.1	2.6499	0.032317
RP11-467L20.10	2.63835	0.0405198
KRT18P41	2.62611	0.017619
RP11-809M12.1	2.61165	0.0112857
KB-1410C5.3	2.60245	0.044501
RN7SL211P	2.60154	0.0408288
SPATA31C1	2.59723	0.0358301
MS4A1	2.59257	0.012074
AC012507.3	2.58941	0.0351985
OPN4	2.58825	0.0456223
CYP4F2	2.58496	0.0352855
RP11-807H22.7	2.58266	0.0453875
AC019185.4	2.57772	0.0328142
RP11-489E7.1	2.57625	0.0424503
RP11-326C3.2	2.57544	0.00799753
PNMA5	2.57498	0.0342807
TAT	2.57492	0.0420978
TRAV25	2.55926	0.0397814
TATDN2P2	2.55793	0.0143868
RP11-280O1.2	2.55642	0.0257687
RP11-151E14.1	2.55384	0.0389838
NIP7P2	2.54423	0.0412485
RN7SL574P	2.54397	0.029486
CEP164P1	2.54258	0.0291974
RP11-166O4.1	2.54157	0.0131569
RP11-190P13.1	2.53807	0.0411572
PROSP	2.52028	0.0316136
RP11-383C5.3	2.51503	0.0119298
RN7SL817P	2.50914	0.023575
ASMT	2.50406	0.0487487
TPO	2.50126	0.0160572
RP11-165P7.1	2.48598	0.0475704
MIR1343	2.47657	0.0348537
POSTN	2.47196	0.00508995
ALOX15	2.47149	0.0427761
KNOP1P5	2.47102	0.0402871
XIRP1	2.46831	0.024748
GABRR1	2.46831	0.0208286
NRG3	2.46556	0.0458079
RP11-726G23.7	2.45811	0.00397937
DPP10-AS1	2.45725	0.0340837
ADAMTS20	2.45035	0.0112613
CRLF2	2.44544	0.0402158
RP11-351J23.2	2.44353	0.044099
OR2L13	2.44096	0.0476227
HMGB3P20	2.42728	0.0361785
COL11A1	2.42542	0.00202264
RP11-58A17.2	2.42294	0.0269701
TRAV4	2.42238	0.0492093
SNX18P7	2.42236	0.0414428
RNY4P16	2.41879	0.0325486
RP5-1112F19.2	2.39153	0.0036837
RP11-95M15.2	2.39012	0.0218162
SETP8	2.38507	0.000369257
SPTA1	2.38496	0.0272261
SV2B	2.38384	0.000531252
COL6A6	2.38111	0.00519192
AL590489.1	2.36899	0.0293935
RNU1-63P	2.36844	0.0347516
AC010149.4	2.35869	0.0296165
AC023590.1	2.35696	0.00482871
ALPK2	2.35671	0.00153888
KCNA1	2.35665	0.0120899
CTRC	2.35312	0.0126143
RNA5SP447	2.35242	0.0422541
SETP2	2.34396	0.00260727
SEZ6	2.34064	0.0495303
LRRC15	2.33654	0.00408803
LMOD3	2.33505	0.0175882
OGFOD1P1	2.3327	0.0369035
AC009518.4	2.3267	0.0274128
SETP7	2.3137	0.00922849
AC099326.1	2.30874	0.0481745
RNU6ATAC40P	2.29961	0.0442121
RNU1-28P	2.29266	0.0134846
LINC01096	2.28812	0.0295865
FCRL3	2.27221	0.00457736
RNU6-492P	2.26485	0.0350228
GREM1	2.26303	0.0301373
DCST1	2.2604	0.0359844
TNFRSF13B	2.25183	0.00245658
PRDM7	2.24024	0.0378799
ABCA12	2.23653	0.0414801
RGSL1	2.20993	0.0494898
RNU1-2	2.20462	0.0315686
VWC2L	2.20209	0.0461525
AC027601.1	2.19993	0.0243163
KIF4CP	2.19059	0.038938
ZNF652P1	2.1863	0.0412627
SLC24A2	2.18325	0.00188312
RP11-342M1.6	2.17284	0.0316359
RP11-71G7.1	2.16346	0.0422366
RP11-84A19.2	2.15275	0.0401443
CSMD2	2.152	0.00581772
RN7SL236P	2.14595	0.000898445
IL19	2.1443	0.0222767
ASTL	2.14254	0.0440715
RP11-7F17.5	2.14192	0.031272
FAM57B	2.13582	0.0297035
TENM3	2.1187	0.00444481
MUC3A	2.11793	0.0022409
FNDC7	2.11563	0.030339
C12orf42	2.10737	0.0170695
KIF26B	2.09606	0.000795561
NETO1	2.08412	0.00437952
SEZ6L	2.06899	0.0361997
TREML2	2.0681	0.000116795
GSG1L	2.0661	0.0332211
NYAP2	2.04939	0.0426114
RP11-488L4.1	2.04758	0.044914
RGS16	2.04625	0.0028835
NTNG2	2.04186	0.00160645
ELFN2	2.03916	0.00377097
CTC-378H22.2	2.03479	0.0329147
SETP22	2.03229	0.000524091
RN7SL217P	2.02853	0.0361984
RP11-434C1.3	2.01221	0.0227382
RP11-536O18.2	2.01084	0.029047
ZNF831	2.00095	0.00151803
AANAT	2.00089	0.0237546
MIR200B	2.00031	0.0216947
DMP1	1.9915	0.0453652
SIGLEC8	1.97932	0.0119094
RLTPR	1.97459	0.00494891
LIPE	1.97089	0.000246733
RNU1-130P	1.96757	0.0308016
ASGR2	1.96729	0.0268267
ENPP7	1.95537	0.0442893
CTC-523E23.5	1.95244	0.0424459
RP11-34E5.4	1.95229	0.0287887
EYS	1.9368	0.00596285
PRPH	1.93601	0.0281015
FFAR4	1.9281	0.0112656
UBE2CP2	1.92464	0.0380179
EGFEM1P	1.92249	0.0239383
SCN4A	1.91867	0.0438417
LTA	1.91711	0.0415543
RN7SL413P	1.91577	0.00318496
RP11-960L18.1	1.91244	0.0426434
ACAP1	1.91087	0.00522802
LPPR4	1.90853	0.00367974
RP11-353N4.5	1.90444	0.0237809
GAPDHP47	1.90034	0.0318436
ADAMTS14	1.88957	0.000491137
SLC19A3	1.88503	0.000957276
COL19A1	1.88292	0.0155947
ZBTB20-AS1	1.8786	0.040219
CTD-2528L19.3	1.87849	0.0414507
DNAH8	1.86434	0.0100797
RNU1-14P	1.86322	0.0278526
TTBK1	1.8622	0.00544815
GPD1	1.85852	0.00391681
RNU4-25P	1.85232	0.00164599
DCC	1.85011	0.00549604
RP11-429J17.8	1.84732	0.0354307
RFX8	1.83829	0.00959004
RNF175	1.83453	0.0453646
PIEZO2	1.81927	0.00033589
MYT1	1.81847	0.0198193
TDO2	1.81704	0.00503667
CARD11	1.81547	0.000313334
SIGLEC6	1.80258	0.0194062
PODNL1	1.79654	0.00026368
TRGC1	1.79563	0.0295303
MROH3P	1.79528	0.0360044
RP5-884G6.2	1.793	0.0241171
TNR	1.77961	0.0169785
FAIM3	1.7707	0.00280864
AC145110.1	1.76856	0.041098
GOLGA8K	1.76244	0.0493021
MMP11	1.759	0.021042
IL21R	1.74949	0.00796393
SETP4	1.74395	0.0037589
RNU1-3	1.7389	0.026488
RP3-395M20.8	1.7389	0.0134774
RGS11	1.73833	0.0103929
SHOX2	1.73491	0.00253918
BTNL8	1.73305	0.0295286
AIM2	1.73292	0.00478783
ARHGAP9	1.73023	0.00149699
ARRDC5	1.7298	0.000789073
NUP210L	1.7244	0.00287318
TG	1.72411	3.36252e-05
ZAP70	1.7237	0.011672
MEOX2	1.72182	0.0152615
SETP17	1.721	0.00143431
RP11-377D9.3	1.71889	0.00352983
RP11-399D6.2	1.71609	0.0486897
NECAB2	1.71452	0.0341806
BLK	1.71438	0.0315278
RP11-6N17.2	1.71231	0.0414246
RASAL3	1.71039	0.00248804
CLEC12B	1.70885	0.0340852
AC026904.1	1.701	0.00177529
C5orf46	1.69968	0.0457113
TLL1	1.69573	0.013498
RP11-78H18.2	1.68856	0.0409732
RP13-200J3.2	1.68697	0.0374959
LINC00514	1.68629	0.0412078
SVEP1	1.68103	0.00613218
ZBP1	1.67791	0.0212691
DUSP2	1.67787	0.00101092
RNVU1-18	1.67747	0.00956563
CCDC108	1.67694	0.0328694
RP11-254B13.3	1.66744	0.0428247
VAT1L	1.65863	0.00663107
TMSB4Y	1.65046	0.00189357
RNU1-52P	1.64991	0.0234828
CD300LB	1.63835	0.0350533
SNORD125	1.63619	0.00280092
RP11-703I16.3	1.63314	0.0117287
FENDRR	1.62972	0.00112641
MAMDC4	1.6261	0.00100712
RNVU1-7	1.621	0.0234736
RP11-39K24.7	1.60409	0.00114334
RP11-166B2.7	1.6026	0.00549868
TCHH	1.59088	0.00423408
PAPPA	1.5874	0.0389616
RNA5SP518	1.58511	0.016351
RP11-23P13.6	1.57921	0.00866218
TRAJ20	1.57574	0.0213563
RP11-29H23.5	1.57501	0.000486973
ST13P12	1.57379	0.0145974
RP11-613M10.9	1.57036	0.0463689
RN7SL823P	1.57035	0.044195
DUOX2	1.56897	0.00139084
AP000695.6	1.56838	0.00894838
LINC01060	1.56474	0.00521925
TAF7L	1.55923	0.00243685
DMBT1	1.55555	0.0276254
CD300C	1.55492	0.0462686
TMC8	1.55483	0.00137331
FASLG	1.55329	0.00901607
AC008155.1	1.54963	0.000103428
MATK	1.544	0.0013346
RP11-163G10.2	1.54368	0.0441807
U1	1.53936	0.0102423
PRKCB	1.5355	0.00693264
ANP32BP1	1.53486	0.0479327
CD247	1.53175	0.0193301
KCNJ15	1.5304	0.0236059
LINC01057	1.52989	0.000983171
P2RX5	1.52721	0.00918609
RP11-473M20.9	1.51372	0.0049201
HMGB2P1	1.50428	0.00377412
KRT86	1.50423	0.00491442
DCLK3	1.50124	0.0105969
LY9	1.50118	0.0137378
PDCD1	1.49851	0.0391816
TRPC3	1.49732	0.00319521
FAM204BP	1.4971	8.17699e-05
AGAP2	1.49641	0.0021889
RP11-58E21.3	1.49472	0.0157614
KIAA1549L	1.4926	0.0304182
RP11-326G21.1	1.49193	1.38e-06
MIR142	1.48985	0.0140129
CALN1	1.487	0.0483133
CD6	1.48111	0.0037273
RHOH	1.47677	0.0156834
PLAU	1.47547	0.00397243
PARP15	1.47541	0.00767081
AC109826.1	1.47111	0.0170417
SDS	1.4692	0.00338539
ITGB2-AS1	1.46802	0.0195166
SLC22A14	1.46146	0.011824
C1orf61	1.45781	0.00968515
GPR114	1.4574	0.0161455
SEMA3D	1.45726	0.0365368
TNN	1.45571	0.0187999
GPR132	1.45451	0.00104544
ITGAL	1.4544	0.0233273
LINC00996	1.45397	0.0148872
UAP1L1	1.45396	0.00670204
IFI30	1.44678	0.00250127
ANP32C	1.44341	0.00622703
GPR68	1.43679	0.00967649
CTD-2020K17.1	1.43489	0.000249204
CD36	1.42926	0.00763969
PITX2	1.4274	0.0386998
CD27	1.42432	0.0495546
RP11-330M2.4	1.42227	0.0100149
COL5A3	1.42082	0.00120986
LINC00922	1.42063	0.0268227
ABCA7	1.4205	0.00606717
NLRC3	1.41979	0.0036
RPGRIP1	1.41843	0.00398602
PRSS36	1.41667	0.00351152
FAP	1.40944	0.0379783
LANCL3	1.40862	0.0239436
NKG7	1.40571	0.0435943
CD37	1.40348	0.00588667
CARD9	1.40312	0.00675472
LINC00635	1.40234	0.0380062
RNU1-1	1.4002	0.0261872
INHBA	1.39147	0.0435185
RP5-1028K7.2	1.38976	0.0169095
NLRP12	1.38846	0.0104651
RP11-214O1.3	1.38816	0.021385
CHRNA1	1.38806	0.0156139
CCDC78	1.38317	0.0186108
HSPA8P4	1.38286	0.00740032
SMCO2	1.38167	0.00794912
KIAA1644	1.37889	0.0354946
MIR663B	1.37853	0.0134482
CD300LF	1.37737	0.00741587
PSTPIP1	1.37292	0.00303531
SPHK1	1.37013	0.0310623
EMR4P	1.3697	0.013416
HMHA1	1.36831	0.00141981
HDGFL1	1.36679	0.034021
PTGIR	1.36182	0.0358764
RNU1-20P	1.3577	0.037148
P2RY8	1.35392	0.0161957
LTF	1.35296	0.0412269
SP140	1.35063	0.0189644
SCML4	1.34546	0.0275934
ADPGK-AS1	1.3453	0.00260524
HLA-DQB2	1.33758	0.0167223
ADTRP	1.33752	0.00482183
HK3	1.33715	0.0113593
GIPR	1.33643	0.0192068
NTRK1	1.33423	0.0188588
TTN	1.33331	0.0095087
DUSP27	1.33222	0.0071997
ANK1	1.33139	0.0405227
MFI2	1.33108	0.0143593
C15orf27	1.32959	0.0167783
RTEL1P1	1.32614	2.20552e-05
HES4	1.32026	0.0491596
DERL3	1.31419	0.0223002
RP5-854E16.2	1.31118	0.0160285
F5	1.30981	0.0429731
MAP4K1	1.30858	0.00244498
RNU2-36P	1.30706	0.0417628
C14orf182	1.30649	0.000657315
IRF5	1.29566	0.000990334
APOBEC3H	1.29465	0.0267258
HNRNPA1P24	1.29193	0.0193309
MOXD1	1.29087	0.0304144
FAM129C	1.29021	0.0441302
PLEKHN1	1.28981	0.0111199
DOCK2	1.28979	0.00119952
PLCB2	1.28886	0.00281935
GRAP2	1.28845	0.0209646
AC144449.1	1.28826	0.00976974
KRT18P15	1.28712	0.00449248
HLA-F	1.28684	0.0038797
EOMES	1.28641	0.0414975
WDFY4	1.28382	0.00175389
C1orf127	1.28078	0.0479739
TRPM2	1.28034	0.000189511
KIAA1045	1.28025	0.00747209
RNU1-16P	1.27975	0.0442854
RP11-936I5.1	1.27873	0.0289268
GNLY	1.27687	0.030512
AC012368.1	1.27618	0.0125394
RP11-750H9.5	1.27324	0.00114449
AC018766.4	1.27273	0.000335456
DENND1C	1.2714	0.00203802
MMP9	1.26756	0.0379965
KIF21B	1.26754	0.000653199
GALNT5	1.26414	0.00539751
ATP2A3	1.26335	0.0492764
AC007278.3	1.26243	0.0224887
AC017035.2	1.26015	0.000623902
PRF1	1.25938	0.0152811
TRAJ12	1.25816	0.0167805
BHLHE22	1.25361	0.00724036
P2RX5-TAX1BP3	1.24948	0.0119486
EFCAB5	1.24674	0.0222339
TMC6	1.24643	0.000924955
U3	1.24432	0.0374826
ABCB4	1.24397	0.000246247
FBLN2	1.24274	0.0419553
RP3-510D11.1	1.23839	0.00473772
PTK2B	1.23634	0.000222075
RUNX3	1.23362	0.0310525
RN7SL546P	1.2305	0.0272141
EVPL	1.22875	3.52152e-05
COL5A2	1.22848	0.00874445
DTHD1	1.22781	0.014035
C5AR2	1.22753	0.00325431
ITGAX	1.22412	0.00154482
PIEZO1	1.22399	0.0110223
MYO1G	1.22044	0.0168721
CCDC64	1.22009	4.46316e-05
ERP29P1	1.21891	0.00152111
NTM	1.21874	0.0316618
DNM1	1.21366	0.00568317
RPL32P1	1.21273	0.0258985
AC020571.3	1.2124	0.0287689
RP11-396B14.2	1.21126	0.0235228
TRAF3IP3	1.20952	0.0201182
PLEKHG7	1.20804	0.0369621
SNORD3B-1	1.20779	0.0484934
SH2D3C	1.20543	0.0211511
CEACAM21	1.2025	0.00983257
AC009961.5	1.19817	0.0412958
DOK3	1.19502	0.00174489
IL4I1	1.1941	0.0380959
IL4R	1.19404	0.00401798
EPS8L2	1.19294	0.0171082
EPS8L1	1.19114	0.0204769
POU2F2	1.18922	0.00431522
VAV1	1.18777	0.00518788
ICOSLG	1.18406	0.00332787
AMPH	1.18314	0.0417508
SIDT1	1.1811	0.0026864
MFAP5	1.17714	0.0457611
RNU2-20P	1.17526	0.00685471
ADAM12	1.17406	0.0128406
NLRC5	1.17176	0.00419635
SLA2	1.17148	0.0123335
OLR1	1.16861	0.0337034
UBE2QL1	1.16611	0.0400305
LIMD2	1.16453	0.00800262
AC090673.1	1.16311	0.0460357
STAT4	1.16281	0.022764
HMGB1P19	1.16265	0.022782
CTB-35F21.1	1.16119	0.0166038
PIK3R6	1.16096	0.000769415
ALOX5	1.16081	0.00130308
RN7SL721P	1.1596	0.0168526
SLCO5A1	1.1591	0.00280887
SNX22	1.15888	0.029409
FMNL1	1.15567	0.00157161
KCTD9P2	1.15504	0.00480606
RN7SL454P	1.15422	0.0101185
RNU2-29P	1.15411	0.00382489
RNU1-83P	1.15391	0.00471858
SPTBN5	1.15174	0.000146082
RP11-512M8.3	1.15155	0.00589415
AC012314.8	1.15035	0.0119008
IKBKE	1.14946	0.00210207
CSF2RA	1.14835	0.00488386
ODF3B	1.14752	0.0128734
ITGBL1	1.14558	0.04709
SASH3	1.14507	0.0163813
RP11-112H10.6	1.14438	0.029229
COL5A1	1.14353	0.0132065
ANO9	1.14277	0.00233078
RNU2-14P	1.14155	0.00385937
AC004447.2	1.14097	0.043017
C9orf139	1.14018	0.0170856
CACNA1F	1.13944	0.0379262
ASMTL-AS1	1.13884	0.0140497
ALS2CL	1.13761	0.0131657
CYTH4	1.13694	0.00519623
AC012066.1	1.13648	0.0225233
IRF8	1.13588	0.0130593
RIPK3	1.1355	0.0256051
NCAM2	1.13045	0.046605
ASIC1	1.12761	0.0376045
ADAM8	1.12218	0.0160151
COL3A1	1.12167	0.0143014
SNORD124	1.1216	0.0251792
ADAMTS12	1.12133	0.00706474
APOBR	1.11983	0.0111066
RN7SL206P	1.1193	0.0110928
SETSIP	1.11919	0.0129828
HSPA7	1.1188	0.00583038
CD1D	1.1182	0.00549148
AC144521.1	1.11684	0.0329566
PTPRCAP	1.11471	0.042523
TAGAP	1.11285	0.0160393
PKP3	1.11087	0.0241604
RP11-57A19.2	1.10887	0.0184534
SYTL1	1.108	0.00508864
RNU6-34P	1.10701	0.00591477
NFAM1	1.10544	0.0155619
UBE2HP1	1.10451	0.0418839
MEGF6	1.10189	0.0160791
TUBB3	1.10103	0.0141941
ZCCHC3	1.10063	0.0336314
RP3-370M22.8	1.10044	0.0123446
KLHL6	1.09957	0.0262975
RP5-1086K13.1	1.09791	0.0107541
PGAM1P7	1.0979	0.0202011
ANPEP	1.09761	0.00565856
KRT8P48	1.09424	0.0465771
RP11-263C24.1	1.09358	0.0087465
RN7SL664P	1.09324	0.0369784
EFCAB4A	1.09296	0.0356055
RN7SL47P	1.09292	0.00621834
ARHGAP15	1.09144	0.0121563
LRRC45	1.0902	0.000959756
RCAN1	1.08659	0.008032
CASP1P2	1.08345	0.0362883
RP11-667M19.9	1.08333	0.0380782
COL9A2	1.08327	0.0152668
PLA2G4C	1.08225	0.000242444
DBH-AS1	1.08101	0.0283233
AZI1	1.08018	0.00225604
COL8A2	1.0797	0.0211901
TYMP	1.07938	0.0323361
ADAMTS13	1.07923	0.00288864
TMEM150B	1.07663	0.00949906
NDOR1	1.07609	0.0242395
ITGA10	1.07549	0.0005297
CORO1A	1.07485	0.0393648
PKMP5	1.07475	0.000956993
NR1I2	1.07347	0.0391877
AMZ1	1.07324	0.0255353
RHPN1	1.06996	0.00236663
TRAF2	1.06979	0.00648453
RP11-32D17.4	1.06851	0.0370287
APOL1	1.06804	0.0177789
OLFML2B	1.06781	0.0313251
PARP10	1.06754	0.0187757
RN7SL732P	1.06649	0.0111012
MYO1F	1.06531	0.0014192
RP11-76E16.2	1.0623	0.0341791
TMEM2	1.06203	0.0158235
IL16	1.0593	0.00307456
KLHL17	1.05783	0.0243012
ZFHX4	1.05699	0.03902
TONSL	1.05425	0.00258097
DAB1	1.05339	0.0460474
EME2	1.0528	4.96e-06
CCDC102B	1.0525	0.00242326
CLEC12A	1.05125	0.0335326
NCKAP1L	1.05107	0.00789338
KCP	1.05083	0.0450611
SARDH	1.05068	0.0152157
MST1	1.04897	0.0031856
CMAHP	1.04601	0.00711706
RP11-432J24.2	1.04506	0.0170949
MORN3	1.04445	0.0108553
HIP1R	1.04433	0.00297183
ADAMTS2	1.0437	0.00789678
DPEP2	1.04334	0.0229192
CCDC141	1.04243	0.0430813
LILRB1	1.04234	0.000795716
SLC16A3	1.03833	0.018018
SH3TC1	1.0363	0.000772522
PIDD	1.03456	0.000332615
CDK5R1	1.03389	0.00822061
TRPV6	1.03304	0.031359
PARVG	1.03211	0.0030219
LINC00968	1.0312	0.0405243
SNORA55	1.03007	0.0315179
ST18	1.02877	0.0441576
RNU6-1329P	1.02819	0.0357972
FANCA	1.02712	0.00715093
CTD-3232M19.2	1.02649	0.0124228
EPPK1	1.02625	0.00387075
RP13-996F3.3	1.02545	0.04796
AC018766.5	1.02369	0.0068994
ROR2	1.02369	0.031581
RTEL1-TNFRSF6B	1.02284	0.00122037
DOCK8	1.02219	0.0132135
TELO2	1.02183	0.00234051
KIF18B	1.02127	0.00878631
TNFRSF4	1.01843	0.0254106
NBEAL2	1.01763	0.000937548
OSCAR	1.01734	0.000457012
SH2B2	1.01678	0.0306275
AL031005.1	1.01659	0.0276565
NAP1L4P1	1.01615	0.00389983
IL22RA1	1.01561	0.0281543
IDUA	1.01117	0.0117617
PTPN7	1.00994	0.0356674
PARP1P1	1.00902	0.0219518
CTSK	1.00723	0.0179481
FAM73B	1.00573	0.0264015
LAMB4	1.00543	0.0272424
ST8SIA1	1.00385	0.000504411
PDE4B	1.00297	0.00915705
TCIRG1	1.00273	0.00287287
FAM8A1	-1.00085	0.00210808
CTC-365E16.1	-1.00179	0.0133402
RP11-274J7.2	-1.00259	0.0460317
IFITM2	-1.00289	0.015079
RGS5	-1.00301	0.0190137
DKFZP667F0711	-1.00343	0.00893764
NKAPP1	-1.00356	0.00327749
ZNF275	-1.00458	0.00299417
CHST3	-1.00572	0.029648
AC010329.1	-1.00607	0.0124622
ESD	-1.0066	0.000629588
RP11-156E6.1	-1.00752	0.00934183
MANEA	-1.00868	0.00336131
C6orf120	-1.00911	0.000307819
LIX1L	-1.01047	0.00263803
CTD-2555K7.2	-1.0106	0.0203808
RBMS3	-1.01174	0.0156104
RPS17	-1.01184	0.00568737
RAB40A	-1.01225	0.0143929
RP11-197P3.5	-1.0123	0.0287264
RPL4P4	-1.01281	0.00264308
ZNF704	-1.01334	0.0443629
RPL9P8	-1.01357	0.016637
RP1-278E11.3	-1.01391	0.0278807
CTA-293F17.1	-1.01408	0.0388576
IER3IP1	-1.01414	0.00183454
TPT1	-1.01444	0.000362426
BAG2	-1.01698	0.00289853
ARL10	-1.01723	0.00760198
RNU6-431P	-1.01748	0.034099
CITF22-92A6.1	-1.01861	0.0354099
RP11-613F22.6	-1.02032	0.0436816
RP11-124N14.3	-1.02059	0.0294883
RPL5	-1.02064	9.97779e-05
MANSC1	-1.02158	0.0118539
RP1-128O3.6	-1.02199	0.0492082
SPATA12	-1.02484	0.0468889
RPL14P1	-1.0259	0.00940927
RP1-151F17.2	-1.02632	0.0296507
HSDL2	-1.02724	0.0022269
RPS2P46	-1.02824	0.00908561
TMEM106B	-1.02924	0.000357221
MORN4	-1.02985	0.0237365
LAPTM4A	-1.03001	0.000834345
NDUFAF4	-1.03002	0.00920538
KLF15	-1.03073	0.0425579
RP5-967N21.7	-1.03333	0.0425932
FMOD	-1.03334	0.00931923
RFTN2	-1.03342	0.00411464
AC096772.6	-1.03421	0.0289675
AC005154.8	-1.03465	0.0315693
KTN1-AS1	-1.03826	0.00232489
RPL34P18	-1.03854	0.00330505
MIR1207	-1.04041	0.0139315
HCG23	-1.04208	0.0437178
CTD-2192J16.15	-1.04376	0.0207358
RP11-5L12.1	-1.0447	0.0482673
MT-TH	-1.04523	0.0157818
SYPL1	-1.04534	0.00682869
ERVMER34-1	-1.04601	0.022818
MIR497HG	-1.04659	0.0314284
POLR2K	-1.04683	0.0010189
COA6	-1.0488	0.00806173
AF129075.5	-1.04926	0.0429712
CTD-2528L19.6	-1.04931	0.00666831
CTD-2026D20.2	-1.04939	0.00429026
NCR3LG1	-1.04955	0.0195203
PTGER2	-1.05009	0.0190833
MMGT1	-1.05107	0.00429574
SEPP1	-1.05143	0.0344334
RP11-379F4.8	-1.05154	0.0251316
B3GNT1	-1.05323	0.0208236
RP11-95D17.1	-1.05427	0.0171571
RN7SKP78	-1.05459	0.000504356
CCR10	-1.05466	0.0231907
RP11-390E23.6	-1.05671	0.0185947
RP11-531F16.4	-1.05764	0.00860019
RPL5P18	-1.0577	0.0493542
RP11-162G10.5	-1.05787	0.0110593
RPL21P120	-1.05797	0.0449935
RP11-56M3.1	-1.0587	0.027814
RP11-519C12.1	-1.05979	0.022092
MRO	-1.05988	0.0383867
LINC00515	-1.06003	0.0464397
GDI2P2	-1.06017	0.0225302
NID1	-1.06074	0.0191255
RP11-304F15.3	-1.06123	0.00959148
HOPX	-1.06289	0.0286314
CAB39L	-1.06313	0.0113953
PPIAP11	-1.06535	0.0420514
TMED10P1	-1.06912	0.0328931
MYRIP	-1.06966	0.0399312
AC007386.3	-1.07124	0.0111765
RP11-539L10.3	-1.07266	0.0406287
RPL12P4	-1.07284	0.00173507
TVP23BP2	-1.07325	0.0432629
GPX3	-1.07374	0.0191556
FABP3	-1.07431	0.0458041
COMMD6	-1.07459	0.0039922
ANKRD29	-1.07557	0.029802
PCGF5	-1.07566	0.000658611
MIR553	-1.0783	0.0391853
RPL5P30	-1.07853	0.00801676
RNU6-123P	-1.07909	0.00848273
TRIM6	-1.07936	0.0421377
CDC42P6	-1.08294	0.0313727
C9orf147	-1.08328	0.0227931
MIR644A	-1.08362	0.029405
CPXM2	-1.08452	0.0419168
RPS3AP6	-1.08551	0.0025177
C11orf70	-1.08769	0.0109565
RPS15A	-1.08938	0.00102133
SCML2P2	-1.08972	0.0473539
GNA14	-1.08976	0.0270227
RPL36AP43	-1.09014	0.0260138
SFR1	-1.09025	0.0313041
USMG5	-1.09112	0.0141762
PRTFDC1	-1.09125	0.0196646
CTB-36H16.2	-1.0923	0.0190224
JAM3	-1.09379	0.011906
NR2F1-AS1	-1.09636	0.0193297
HOXD8	-1.09663	0.0468255
RP4-680D5.2	-1.09726	0.011917
RPS18P12	-1.0974	0.00373652
NUDT7	-1.09801	0.0171325
FAM210B	-1.09861	0.0136253
RNU6-107P	-1.09867	0.0400417
RP11-517H2.6	-1.09999	0.00935044
FHL1	-1.10042	0.0339203
VMA21	-1.10403	0.0069395
RP11-252K23.1	-1.10465	0.00421479
CCDC169	-1.10516	0.045927
RPS4X	-1.10571	0.000315423
GCSHP5	-1.10723	0.00369308
TAF9B	-1.1073	0.00256506
WFDC1	-1.10757	0.0420617
RPL10P3	-1.11066	0.0239689
RP11-39K24.4	-1.1109	0.046312
EID1	-1.11354	0.000215237
TM4SF18	-1.11487	0.0136822
RBP7	-1.11739	0.0468298
AC078899.3	-1.11886	0.0382121
CTD-2313J17.1	-1.11914	0.0266055
RNU6-593P	-1.12327	0.0249284
AC005789.11	-1.12328	0.00535452
RP11-250B2.6	-1.12398	0.0306204
MT-CYB	-1.12401	0.00659546
RNF180	-1.12426	0.0327945
RN7SL44P	-1.12581	0.0451695
AC074367.1	-1.12725	0.00368547
NACAP1	-1.12883	0.00787148
RPL5P34	-1.12949	0.000141377
HOXD9	-1.13021	0.0477692
RP11-181C21.4	-1.13157	0.00910768
ALDH6A1	-1.13221	0.0051519
RP11-197M22.2	-1.13245	0.000255255
RP11-83J16.1	-1.13419	0.0295929
TOPORS-AS1	-1.13434	0.044009
AC139452.2	-1.13543	0.000933938
HSPA8P3	-1.13613	0.0226969
AC105020.1	-1.13624	0.0449557
SLC16A9	-1.13783	0.0194805
RPL15P2	-1.13896	0.0375217
RP11-423O2.5	-1.13913	0.0476514
PTHLH	-1.14013	0.0481621
PELI2	-1.14025	0.0167871
RPL18AP3	-1.14117	0.0320707
RP11-887P2.6	-1.14126	0.0360613
ZDHHC2	-1.1416	0.0163898
RP11-147L13.8	-1.14332	0.00953193
MTCYBP3	-1.14356	0.0151522
SSPN	-1.14367	0.00533712
RPL5P24	-1.14557	0.0393739
RP11-5C23.2	-1.14583	0.0112598
RPL6P27	-1.14678	0.00205048
KL	-1.14719	0.0404916
RP11-597D13.9	-1.14747	0.0265887
MT-ND2	-1.14851	0.0077964
WASF3	-1.14863	0.0292516
RP11-484D2.4	-1.14957	0.0431042
ACSM3	-1.15063	0.0305076
RP11-77K12.3	-1.15097	0.0474946
CTD-2006H14.2	-1.15422	0.0356958
RP4-714D9.5	-1.15629	0.0184865
SLC27A6	-1.15641	0.0412784
RP11-760H22.2	-1.15752	0.0370782
RNU6-534P	-1.15841	0.0282215
PACRG	-1.15956	0.00225422
RP1-40E16.12	-1.16033	0.0200411
FAM175A	-1.16234	0.00351175
TRAM2-AS1	-1.16357	0.00156771
JAM2	-1.16407	0.0135497
FAM229B	-1.1667	0.00464197
SGCD	-1.16794	0.0373554
C10orf32	-1.16809	0.0403224
FAM66B	-1.16831	0.0249742
RP11-370I10.6	-1.1686	0.0082527
CTC-366B18.4	-1.16965	0.0148036
PYGO1	-1.17619	0.0427146
PEG10	-1.17632	0.0313383
MGP	-1.17738	0.0463069
SUGT1P3	-1.17893	0.00803661
YWHAZP3	-1.18023	0.0137132
RP11-24C3.2	-1.18066	0.00725423
RP11-820K3.2	-1.18126	0.0222896
SDC2	-1.18214	0.0158668
RP11-76N22.2	-1.18293	0.00501783
SEC61G	-1.18549	0.00303325
VTRNA2-1	-1.18603	0.0128069
LHFP	-1.18685	0.00943221
RPL36AP33	-1.18699	0.0303376
DKK3	-1.18742	0.0014177
LINC00312	-1.18768	0.013643
TCEAL1	-1.18815	0.00192784
RP11-727A23.11	-1.18932	0.029099
RP4-539M6.20	-1.19167	0.0135332
DNAJC12	-1.19235	0.0295319
RP11-388M20.1	-1.19543	0.0124261
RP11-48G14.1	-1.19641	0.0159366
H3F3AP4	-1.1972	0.0111963
AP001429.1	-1.2016	0.0024418
PTCH2	-1.20172	0.0251341
RP11-6N17.4	-1.20321	0.0128131
RPL39	-1.20351	0.0022909
RP1-145M24.1	-1.20388	0.0254374
BBS10	-1.20455	0.0046231
AC117395.1	-1.20543	0.029842
KB-1562D12.1	-1.20553	0.0364878
RP11-165H4.2	-1.20631	0.0281754
CYSTM1	-1.20676	0.000673107
RP4-614O4.12	-1.2091	0.0308062
RP11-686D22.4	-1.21047	0.020902
RNU6-828P	-1.21129	0.00671198
RP11-452K12.3	-1.21138	0.043492
CTD-2002H8.2	-1.2157	0.0200569
MLTK	-1.21582	0.00285455
RNU6-681P	-1.2163	0.0394299
CTH	-1.21861	0.00933481
BDNF	-1.21879	0.0285518
CTC-462L7.1	-1.21923	0.0145699
RP11-61L19.1	-1.21927	0.00295234
MIR143HG	-1.2193	0.0289225
RP3-510L9.1	-1.21987	0.016163
NAP1L4P3	-1.22042	0.0316621
AC132192.1	-1.22072	0.0108031
HIF1AP1	-1.22081	0.0108661
GNG12	-1.22161	0.00118535
AC012363.4	-1.22338	0.00652536
RFK	-1.22405	0.000916725
AL139099.1	-1.22453	0.0319499
RP13-487P22.1	-1.22474	0.00224948
RPL26P30	-1.22863	0.0416794
ZSWIM5	-1.23325	0.0415529
RN7SL788P	-1.23544	0.0214278
RPL5P12	-1.2365	0.0160738
RP11-383B4.4	-1.23859	0.00675617
CHMP1B2P	-1.23898	0.0228603
MTND4P14	-1.24121	0.0187188
F8A1	-1.24121	0.00766596
RP11-48G14.2	-1.24245	0.0352473
RP11-761N21.2	-1.24308	0.00690635
TGFBR3	-1.24447	0.0120955
COL14A1	-1.24474	0.0226904
RP6-201G10.2	-1.24589	0.0494862
RP11-16F15.1	-1.24747	0.0145086
NTRK2	-1.24765	0.0414798
ZNF33BP1	-1.25047	0.0335792
CAV1	-1.25096	0.0116413
RP11-196G11.4	-1.25115	0.0440561
THBS4	-1.25143	0.00332696
SYNGR1	-1.25437	0.0316161
HSPE1P26	-1.25438	0.0430341
RP11-632C17__A.1	-1.25458	0.0202227
RP11-290D2.3	-1.25595	0.00171302
MROH7	-1.25654	0.000721349
MT-ND3	-1.25925	0.0100364
RP11-498D10.6	-1.25965	0.00551196
CTB-131B5.2	-1.26067	0.00177156
RP11-523G9.3	-1.26129	0.0383492
KIAA1586	-1.26358	0.000119649
RNU6-786P	-1.26414	0.0230584
SYT15	-1.26421	0.00828417
ITM2B	-1.26606	0.00112132
MTATP6P1	-1.26613	0.00224736
HFM1	-1.26619	0.0153898
CTD-2286N8.2	-1.26682	0.048444
RP11-13N13.2	-1.26761	0.0449249
RP11-553L6.5	-1.27103	0.000104318
AGPAT9	-1.27185	0.0389887
RP11-305K5.1	-1.27291	0.0342618
RP11-774O3.3	-1.27373	0.00968007
ITGB3	-1.27555	0.0373701
RP5-1000K24.2	-1.27699	0.010543
EGFL8	-1.27723	0.000197077
SERHL2	-1.27764	0.0225892
CHST7	-1.27879	0.0361103
RP4-802A10.1	-1.27985	0.0152813
CTC-510F12.2	-1.2804	0.00352512
NLGN4X	-1.28216	0.0285687
AC007557.3	-1.28246	0.0393867
RP1-266L20.9	-1.2832	0.0265397
STARD13-IT1	-1.28395	0.0149804
RNU6-834P	-1.28471	0.0282729
AC098820.3	-1.28744	0.047296
AL353763.1	-1.28823	0.0186912
RN7SL16P	-1.28861	0.000906026
IL17D	-1.29044	0.00232293
RPS7P10	-1.29183	0.023482
CMYA5	-1.29199	0.0486946
TMEM47	-1.29223	0.00296971
RP11-384C4.3	-1.29233	0.000479374
RP11-351M8.1	-1.29473	0.0175989
RP11-466H18.1	-1.29697	0.00130149
CTD-2287O16.1	-1.29704	0.0133837
PPT2	-1.29886	0.00580308
NDUFAF4P1	-1.3	0.0312629
WDFY3-AS2	-1.30006	0.00184785
MBLAC2	-1.30042	0.00600056
RP11-160A9.3	-1.30049	0.0379772
RP11-715F3.2	-1.30208	0.000356721
RP11-312J18.5	-1.3031	0.00721953
Z98881.1	-1.30504	0.032084
UBQLN3	-1.30623	0.0152737
RP11-734J24.1	-1.3065	0.0293103
LDB3	-1.30667	0.0173309
ZCCHC18	-1.30726	0.0230418
RPL15P3	-1.30853	0.0469691
RP11-16B13.1	-1.31138	0.0144674
RNY3	-1.31236	0.000538726
RPS3AP47	-1.31371	0.042455
MIR1205	-1.31647	0.0499951
RP11-403E24.1	-1.31741	0.0134425
RNU6-1283P	-1.31833	0.00959204
RP11-6N17.6	-1.31976	0.0386027
CTD-3093M3.1	-1.31985	0.0220565
MT-ND4	-1.32698	0.00365856
RP11-428J1.5	-1.32709	0.0122399
APOD	-1.32981	0.0134692
CTC-428G20.3	-1.32992	0.0004061
CTD-2651B20.1	-1.3314	0.0103634
MT-CO3	-1.3318	0.000826146
AC131025.8	-1.33184	0.0261065
ABI3BP	-1.3324	0.0448983
RP5-1042I8.7	-1.33335	0.0247414
SMOC2	-1.33374	0.0106748
CHL1	-1.33399	0.0318632
RNU6-968P	-1.33897	0.0329024
MT-TR	-1.33977	0.0223859
INHA	-1.34001	0.0351594
AC019097.7	-1.34086	0.000251368
SNORD108	-1.34383	0.0420373
RCAN2	-1.34623	0.000213299
ALDH1A1	-1.34649	0.00933061
COX7C	-1.34685	0.000324822
CAV2	-1.35074	0.00712781
RP11-316E14.6	-1.35159	0.0126584
NPM1P14	-1.35282	0.030622
SNURF	-1.35467	0.0403696
UQCRBP1	-1.3547	0.0416283
TUBA8	-1.35568	0.00778504
RP11-226L15.5	-1.35586	0.0131894
PID1	-1.35605	0.0186842
AL592310.1	-1.35823	0.0144022
RP11-844P9.2	-1.35938	0.0473162
RP11-434P11.2	-1.36016	0.00578144
RNU6-249P	-1.36068	0.0363924
AC024257.1	-1.36171	0.00506684
RPL7AP30	-1.36177	0.00105861
RNY4P4	-1.36451	0.00434326
RP11-90L20.2	-1.36454	0.0249081
RP11-231L11.3	-1.36489	0.0031426
RP11-175B9.3	-1.36774	0.0129811
FHL2	-1.36881	0.00680191
RN7SKP151	-1.36908	0.0201346
PRKAR2B	-1.37031	0.0140593
RP11-285J16.1	-1.37065	0.016812
RNU6-1138P	-1.37253	0.00390135
DOC2A	-1.37416	0.0428277
BMX	-1.37624	0.0133542
AP001468.1	-1.37687	0.0132046
RP3-466I7.1	-1.37696	0.00788759
HCG11	-1.38006	0.00309982
RP11-96D1.9	-1.38034	0.012193
RAD21-AS1	-1.38348	0.03579
SERP2	-1.38463	0.00157535
RHEBP2	-1.38589	0.0148981
AC009093.1	-1.38617	0.0465679
RP11-218F10.3	-1.38674	0.00989956
RN7SL529P	-1.38701	0.0187624
ANK2	-1.38769	0.00403306
LAMA2	-1.3882	0.0106632
MICD	-1.38847	0.0436777
IGFBP5	-1.38904	0.00692013
SNRPEP4	-1.38972	0.0289035
RP11-160O5.1	-1.39151	0.0279987
TMED6	-1.393	0.021037
TMED7	-1.39368	0.000134978
RP5-991G20.2	-1.39414	0.0210685
CTB-92J24.2	-1.39626	0.0168927
RP11-68L18.1	-1.3982	0.0294884
ATP5J2-PTCD1	-1.40207	0.00728983
CTD-3193K9.3	-1.40224	0.0241589
RP11-541N10.3	-1.40359	0.00538232
CTD-2349P21.10	-1.40477	0.0463716
LYVE1	-1.40526	0.0130726
RP4-575N6.4	-1.40621	0.0385993
RP11-5C23.1	-1.40872	0.00813526
RP11-112J1.1	-1.40874	0.000585606
MEF2C-AS1	-1.40899	0.0156071
MIR145	-1.40973	0.0194964
RP11-950C14.7	-1.41091	0.0352624
MIR2909	-1.41153	0.0492938
RP11-477G18.2	-1.41303	0.0415788
RP11-888D10.4	-1.41715	0.0294791
FAM19A5	-1.41956	0.0136958
RP5-1136G13.2	-1.42219	0.00299639
RP1-7G5.5	-1.42503	0.0311984
RP11-806O11.1	-1.42616	0.0260699
RP11-283I3.6	-1.42677	0.000386429
GPRASP2	-1.42723	0.00329232
RP11-203F10.6	-1.42768	0.0468472
ST3GAL4	-1.4286	0.00317985
RP11-100N21.1	-1.42866	0.0290767
BHMT2	-1.42963	0.00209961
SNX29P2	-1.43009	0.00754381
RP11-39K24.14	-1.43045	0.0480366
TSPAN5	-1.43157	0.00240872
RP11-436H11.5	-1.43301	0.0174355
RP11-479O17.10	-1.43745	0.0189415
CTC-575D19.1	-1.44134	0.000764921
RP11-332P22.2	-1.44188	0.0399102
RP11-91J19.4	-1.44238	0.01041
CCL14	-1.44305	0.0319045
IMPG2	-1.44417	0.0107969
LINC01059	-1.44456	0.000546091
RP11-110H1.4	-1.44504	0.0239036
RP11-51L5.2	-1.44745	0.0492243
RPS4XP14	-1.44931	0.00965956
RPEL1	-1.44987	0.0427671
RPL36AP13	-1.45187	0.0192266
RNU7-57P	-1.4527	0.0272412
RP11-225B17.2	-1.45311	0.00876146
VN1R81P	-1.45381	0.00750457
RPL7AP11	-1.45389	0.0274813
RP11-666A8.7	-1.45396	0.0425105
FXYD6	-1.45544	0.00832733
IL33	-1.45769	0.01851
PKD1P1	-1.45839	0.00582008
RP1-283K11.2	-1.45967	0.0100948
MTND2P2	-1.46042	0.0470052
MIR3139	-1.4617	0.0421325
ANKRD26P4	-1.46253	0.0388908
SLC9B1	-1.46421	0.00782195
SAMD5	-1.47122	0.0496891
RP11-362K14.7	-1.47608	0.0268542
CCDC36	-1.4765	0.0344133
AP000473.8	-1.47891	0.0159118
MTND4P12	-1.4815	0.00434466
MT-ATP6	-1.48267	0.000546117
TIMP1	-1.48393	1.42063e-05
KB-1958F4.1	-1.48511	0.0193357
HOXC5	-1.48521	0.0454532
ELOVL4	-1.48571	0.023646
RP11-46H11.3	-1.48669	0.00664563
PROS1	-1.48696	0.00263492
AOX1	-1.48798	0.0189146
CALCRL	-1.4901	0.00143551
LAMP5	-1.4906	0.00382821
RP11-342K6.2	-1.4926	0.00602247
ALG3P1	-1.49288	0.0309895
RP11-549L6.2	-1.49323	0.0149436
SPARCL1	-1.49501	0.0010844
GNG11	-1.49537	0.013085
RP11-354E23.5	-1.49578	0.047909
F8	-1.49611	0.00124707
FKBP7	-1.49643	0.000194872
RN7SKP87	-1.49657	0.0458275
TRPC4	-1.50329	0.00360402
RP11-378J18.8	-1.50602	0.0115144
RPL7AP26	-1.50993	0.0377853
AC138655.1	-1.5117	0.0218661
RPL37P23	-1.51479	0.00522721
CSNK1A1P3	-1.51498	0.0129759
LGI4	-1.5156	0.00331128
RP11-151D14.1	-1.51626	0.0112522
RP11-20O24.4	-1.51672	0.00286648
AC018755.16	-1.51675	0.0348919
PABPC1P1	-1.51685	0.0386757
RNY4P3	-1.51724	0.0192793
RP11-295M18.2	-1.51905	0.0368399
C6orf52	-1.52042	0.0037714
VN1R82P	-1.52156	0.00079122
CLDN11	-1.52287	0.00520631
RP11-333E13.2	-1.52411	0.00961805
RUNDC3B	-1.52429	0.00492518
RP11-443F16.1	-1.52573	0.00710325
COX7A1	-1.52647	0.0139793
RP3-486I3.4	-1.52658	0.0122779
PRPH2	-1.52687	0.00721079
RN7SKP97	-1.52765	0.0439931
SNCG	-1.5278	0.0274745
RGS22	-1.53077	0.0276072
AC022431.1	-1.53103	0.000815867
ABCG2	-1.53128	0.000333659
MTND2P28	-1.53147	0.00396286
TMEM220	-1.53411	0.0029953
C10orf62	-1.53535	0.0481029
DUSP26	-1.53967	0.0156481
RP11-571M6.17	-1.54005	0.0271243
TSPAN6	-1.54068	3.36e-06
SLC16A14	-1.5418	0.000516207
MAMDC2	-1.54255	0.0192115
BMP6	-1.54293	0.0118118
FAM133A	-1.54593	0.0219029
PDGFRA	-1.54675	0.0141081
SYTL4	-1.54765	0.0115273
ZHX1-C8ORF76	-1.54887	0.0411757
RN7SL20P	-1.54947	0.0187737
RNU6-1327P	-1.54991	0.0131807
NRXN2	-1.55037	0.000431294
CTD-3035D6.1	-1.5512	0.00106181
USMG5P1	-1.55256	0.0423526
RP11-50B3.4	-1.5553	0.0254348
RP11-230C9.2	-1.55681	0.01053
CYP11A1	-1.55734	0.042402
MIR3188	-1.55763	0.0489623
RP11-1136G11.6	-1.55769	0.0370642
AC005534.6	-1.56016	0.0239928
RP4-717I23.2	-1.56022	0.00247322
RP11-49I11.1	-1.56383	0.043198
RP11-458D21.6	-1.56385	0.00979644
REEP6	-1.56635	0.0164422
RNU6-750P	-1.56802	0.0380818
RP11-11C20.3	-1.56849	0.0220884
ASXL3	-1.56939	0.0300566
CAMK2N1	-1.57213	0.00693068
AC139768.1	-1.57474	0.0324814
ABCA10	-1.5777	0.00957178
RP11-754B17.1	-1.57923	0.0498023
MYOZ2	-1.58692	0.0407948
SNRPGP10	-1.59007	0.0438583
RPL5P5	-1.59028	0.0401569
RP11-532F6.3	-1.59256	0.00888802
RNU6-444P	-1.59273	0.0421685
RP1-137D17.2	-1.59334	0.00582819
RP11-206L10.10	-1.59917	0.0424087
RP11-158M2.5	-1.59925	0.0452462
MIR4803	-1.5995	0.0427209
SDPR	-1.60208	0.00859669
RP5-857K21.7	-1.60515	0.0337213
CDO1	-1.60559	0.00621721
MIR4767	-1.6121	0.0188662
PRELP	-1.61382	0.00206286
RP11-769N19.2	-1.61447	0.00649731
RP11-498D10.3	-1.61455	0.0382087
EMILIN3	-1.61493	0.0125689
RP11-522L3.6	-1.61585	0.0385351
KLHL4	-1.61631	0.00941821
RPL23AP69	-1.62255	0.027896
RP11-235E17.3	-1.62302	0.0119746
RP11-712L6.5	-1.62327	0.0272734
HTR2B	-1.62368	0.00207773
TMEM150C	-1.62592	0.00148582
UBXN8	-1.62835	0.00515878
SYPL2	-1.62862	0.010605
AC009963.6	-1.63136	0.0480409
ALG9-IT1	-1.63138	0.0190507
RP1-40G4P.1	-1.63486	0.0330497
RNY4P7	-1.63904	0.00675067
RP11-16E18.1	-1.63947	0.0151619
ARHGAP6	-1.63981	0.00193646
OR7E47P	-1.64033	0.0147642
RNU6ATAC14P	-1.64061	0.0402969
AF129408.17	-1.64208	0.0268359
RP11-187O7.1	-1.64367	0.0297185
MIR103A2	-1.64398	0.0196009
MTND5P26	-1.64412	0.00403211
GOLGA8M	-1.64633	0.00612414
MPV17L	-1.64814	0.00067261
WNT2B	-1.64918	0.0251392
CTD-2105E13.13	-1.64958	0.0359523
RP11-91P24.5	-1.65215	0.00404154
GSTM3	-1.65345	0.00919777
CMBL	-1.65575	0.00191512
CTC-297N7.5	-1.66031	0.0366867
RP11-843P14.2	-1.66135	0.0312156
RP11-301G23.1	-1.66408	0.0195807
RPL39P3	-1.66448	0.00555725
RP11-206L10.8	-1.66733	0.00428228
RN7SL786P	-1.6681	0.0365602
U91328.22	-1.66929	0.0435247
CPED1	-1.66975	0.00259937
RNA5SP372	-1.67051	0.0419077
AC016700.5	-1.67124	0.0416916
MORF4L2-AS1	-1.67344	0.00421163
RP11-156N15.1	-1.67462	0.0294894
FGF2	-1.67603	0.00762864
RNU6-789P	-1.67873	0.0356411
CCDC3	-1.67882	0.000548725
RP1-128M12.3	-1.67903	0.0257881
RP11-90P5.5	-1.68001	0.0143039
OR52H1	-1.68043	0.000629796
PON3	-1.68144	0.0301866
CLEC3B	-1.68625	0.0418046
RP11-427M20.1	-1.68687	0.0414256
SLC7A2	-1.68711	0.0261574
RP11-720N19.2	-1.6893	0.0230487
TPT1P9	-1.68973	0.00108607
PCSK6	-1.69038	0.0107696
AC027307.3	-1.69228	0.0404758
RP11-231G3.1	-1.69266	0.000765527
NRG2	-1.69498	0.00885037
RP11-535K18.2	-1.6961	0.0474239
RNU6ATAC30P	-1.69905	0.0416594
AC007966.1	-1.69916	0.0360849
PLN	-1.69944	0.0200151
RNU6-703P	-1.70229	0.00662411
RNU6-360P	-1.7025	0.0193403
RP11-38P22.2	-1.70386	0.000503883
RAB9B	-1.70439	0.00734045
RNU7-124P	-1.7044	0.0104816
RP3-327A19.5	-1.70723	0.0338935
RP3-452M16.1	-1.70802	0.041214
RP11-554A11.6	-1.70827	0.0331862
NR2F2	-1.70897	0.00195666
CACNA1H	-1.7096	0.00419133
RP11-153M7.5	-1.70982	0.031399
RP11-209D14.4	-1.71129	0.000298035
FOXC2	-1.71338	0.000941305
MIR616	-1.71352	0.0303982
RP11-434B12.1	-1.71615	0.018802
AC023490.1	-1.71618	0.0387252
CD302	-1.72045	0.000113056
RP11-32P22.1	-1.72533	0.000864942
AL441988.1	-1.72682	3.78325e-05
RP11-190C22.1	-1.72759	0.038886
SCARA5	-1.72829	0.00845018
RP11-49I11.2	-1.72994	0.0016549
CTC-338M12.6	-1.732	0.0454906
ARHGAP31-AS1	-1.73275	0.0394149
RP11-569A11.1	-1.7332	0.0261164
RNY1	-1.73452	0.000560355
LRRC3B	-1.73794	0.0133585
RP5-855D21.2	-1.7388	0.0376933
MTND4P32	-1.74166	0.00156892
MIR4482-1	-1.74285	0.0326918
LINC00896	-1.7432	0.0376618
GPBAR1	-1.74376	0.012933
RP11-118K6.3	-1.74387	0.0428674
ADAM23	-1.74874	0.000552314
RP11-685B14.1	-1.74981	0.0464505
RP11-105N14.1	-1.7516	0.0191838
RNU6-925P	-1.75168	0.0100332
RNU6-603P	-1.75178	0.0074703
CTC-268N12.3	-1.75184	0.0273588
MAOB	-1.75637	0.00901481
RP11-2E17.2	-1.75803	0.0130847
LRRC2	-1.76405	0.0028414
TMEM246	-1.76412	0.0282266
AC079250.1	-1.76635	0.0315314
MIR4642	-1.76806	0.00864829
SERPINA3	-1.76914	0.0475627
VSTM4	-1.77043	0.0017923
ANGPTL1	-1.7758	0.0021836
RPL21P28	-1.77629	0.0220998
PROX1	-1.78048	0.00515866
RP11-613D13.4	-1.78059	0.0143966
AC007292.1	-1.78308	0.0130572
RP11-888D10.3	-1.7831	0.0213459
AL132709.8	-1.78421	0.0337157
RP11-134G8.7	-1.78608	0.0397768
RP5-916O11.2	-1.78807	0.0375431
RNY4	-1.78941	0.000566342
VN1R84P	-1.78988	0.047638
RP11-389G6.3	-1.79195	0.0154801
RPS20P35	-1.79352	0.0122105
RNU6-581P	-1.79483	0.0487057
RP11-141M1.3	-1.80184	0.000534074
OR7E100P	-1.80217	0.0440139
KANSL1-AS1	-1.80242	0.0262165
RP11-24B19.3	-1.80247	0.0212534
RTN3P1	-1.80485	0.0172513
RPS6KA6	-1.80606	0.0236415
RP11-514F3.5	-1.80641	0.028361
NCAM1	-1.80843	0.00721159
RP11-963H4.5	-1.80934	0.0425218
CTC-451P13.1	-1.80988	0.0365063
RPL34P6	-1.81003	0.0470803
MGARP	-1.81018	0.0166803
RN7SL23P	-1.81027	0.00025286
AC100830.4	-1.81114	0.0171299
NPB	-1.81298	0.0338646
RP5-850O15.4	-1.81349	0.0303894
AP000344.4	-1.81512	0.0213949
RNU11-6P	-1.81806	0.0385505
PCP4	-1.81858	0.0496725
RP11-395N3.1	-1.81863	0.023559
MTND1P23	-1.82172	0.0125892
SEPT7P8	-1.82434	0.0186543
CTD-2302E22.4	-1.82768	0.0416327
RNY3P1	-1.82868	0.00041756
MIR370	-1.83143	0.0366153
HOXC6	-1.83292	0.00944554
RP11-168F9.2	-1.83307	0.0367803
LRRC70	-1.83348	0.0356287
AC109333.10	-1.83571	0.0474182
MT-ATP8	-1.83661	3.67837e-05
TGFB2	-1.84133	0.00149194
TCF23	-1.84168	0.0115993
MCFD2P1	-1.84361	0.0453083
RNU4ATAC18P	-1.84737	0.0309922
RP11-532M24.1	-1.85229	0.0396654
LEPREL1	-1.8526	0.00194943
FNDC4	-1.8531	0.00867333
[truncated: 645 more rows]
