# Supplementary material for: Characterization of Candidate Factors Associated With the Metastasis and Progression of High Grade Serous Ovarian Cancer
Source: Research Square preprint supplement (doi:10.21203/rs.3.rs-497718/v1), 2021-05-11
Supplement: Supplementary file 2 [file bcb7d0cb17cad283d67b5d70.docx]

Additional Files

Supplementary Materials

Figure1：Standardization of gene expression. (a) The standardization of GSE30587 data, (b) the standardization of GSE137237 data, (c) the standardization of GSE98281 data and (d) the standardization of GSE133296 data. The pink bar represents the data before normalization, and the blue bar represents the normalized data.

Figure2: Representative immunohistochemistry images of hub genes in ovarian adenocarcinoma serous cancer and normal ovary tissues derived from the Human Protein Atlas (HPA) database and their relationships.

Figure3: The correlations of 6 hub genes and 7 subtypes of tumor microenvironmental cells from TIMER2.0.

Table S1. The up and down-regulated DEGs of GSE30587 datasets. |logFC|＞1, P.Value＜0.05.

Table S2. The up and down-regulated DEGs of GSE137237 datasets. |logFC|＞1, P.Value＜0.05.

Table S3. The up and down-regulated DEGs of GSE98281 datasets. |logFC|＞1,P.Value＜0.05.

Table S4. The up and down-regulated DEGs of GSE133296 datasets. |logFC|＞1,P.Value＜0.05.

Supplementary Table 5. GO and KEGG terms of candidate genes significantly upregulated in MT group
