# Supplementary material for: Characterization of Candidate Factors Associated With the Metastasis and Progression of High Grade Serous Ovarian Cancer
Source: Research Square preprint supplement (doi:10.21203/rs.3.rs-497718/v1), 2021-05-11
Supplement: Supplementary file 3 [file f50fee25a4e632b7b3eb7862.xlsx]

## Sheet: 工作表1
Supplementary Table 5. GO terms of candidate genes significantly upregulated in MT group
Term	Description	Gene Symbols
GO:0030178	negative regulation of Wnt signaling pathway	SFRP2,BARX1,ALPK2
GO:0045444	fat cell differentiation	FABP4,SFRP2,ADIPOQ,CNR2,GPR68
GO:0030198	extracellular matrix organization	FAP,SFRP2,COL5A3,ADIPOQ
GO:0032102	negative regulation of response to external stimulus	CNR2,FAP,ADIPOQ,GPR68
Supplementary Table 5. KEGG terms of candidate genes significantly upregulated in MT group
ID	Description	Gene Symbols
hsa03320	PPAR signaling pathway	FABP4,ADIPOQ
hsa00100	Steroid biosynthesis	FAP
hsa04975	Fat digestion and absorption	FAP
hsa04930	Type II diabetes mellitus	ADIPOQ
hsa04923	Regulation of lipolysis in adipocytes	FABP4
hsa00561	Glycerolipid metabolism	FAP
hsa04920	Adipocytokine signaling pathway	ADIPOQ
hsa04211	Longevity regulating pathway	ADIPOQ
hsa04974	Protein digestion and absorption	COL5A3
hsa04640	Hematopoietic cell lineage	CD37
hsa04972	Pancreatic secretion	FAP
hsa04152	AMPK signaling pathway	ADIPOQ
